# Supplementary material for: Structure–activity relationship for calanthoside, a potential hair-growth stimulant with an indole 2-S-,3-O-bis-glucoside structure. Part 1: role of two glucoside moieties in promoting HFDPC proliferation
Source: Royal Society of Chemistry journal article supplement (doi:10.1039/d6md00273k), 2026-05-15

# SUPPLEMENTARY INFORMATION

## Experimental Details and Characterization Data

### Structure–activity relationship for calanthoside, a potential hair-growth stimulant with an indole 2-*S*-,3-*O*-bis-glucoside structure. Part 1: Role of two glucoside moieties in promoting HFDPC proliferation

Riko Suzuki<sup>a</sup>, Katsuki Takashima<sup>b</sup>, Yoshiaki Manse<sup>c</sup>, Haruto Nishikawa<sup>b</sup>, Mina Ashidate<sup>b</sup>, Shinsuke Marumoto<sup>d</sup>, Fumihiko Ishikawa<sup>b</sup>, Toshio Morikawa\*<sup>c</sup>,  
Genzoh Tanabe\*<sup>a,b,c</sup>

<sup>a</sup>Graduate School of Pharmacy, <sup>b</sup>Faculty of Pharmacy, <sup>c</sup>Pharmaceutical Research and Technology Institute, <sup>d</sup>Joint Research Centre, Kindai University, 3-4-1 Kowakae, Higashi-osaka, Osaka 577-8502, Japan

### Table of Contents

<sup>1</sup>H- AND <sup>13</sup>C-NMR SPECTROSCOPIC DATA OF SYNTHETIC COMPOUNDS

S1–S37

<sup>1</sup>H-NMR (800 MHz, D<sub>2</sub>O) of 3-(β-D-Glucopyranosyloxy)-1*H*-indol-2-yl 1-thio-β-D-galactopyranoside (**8b**).

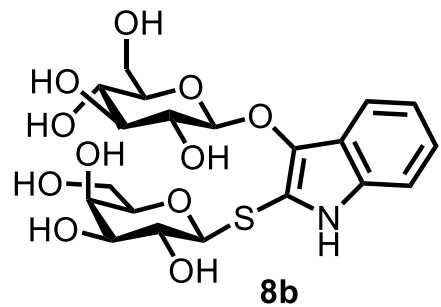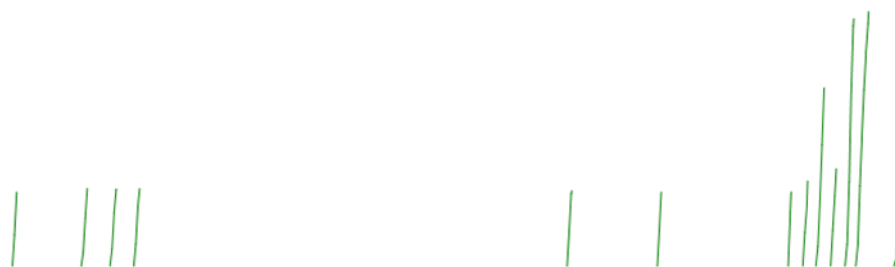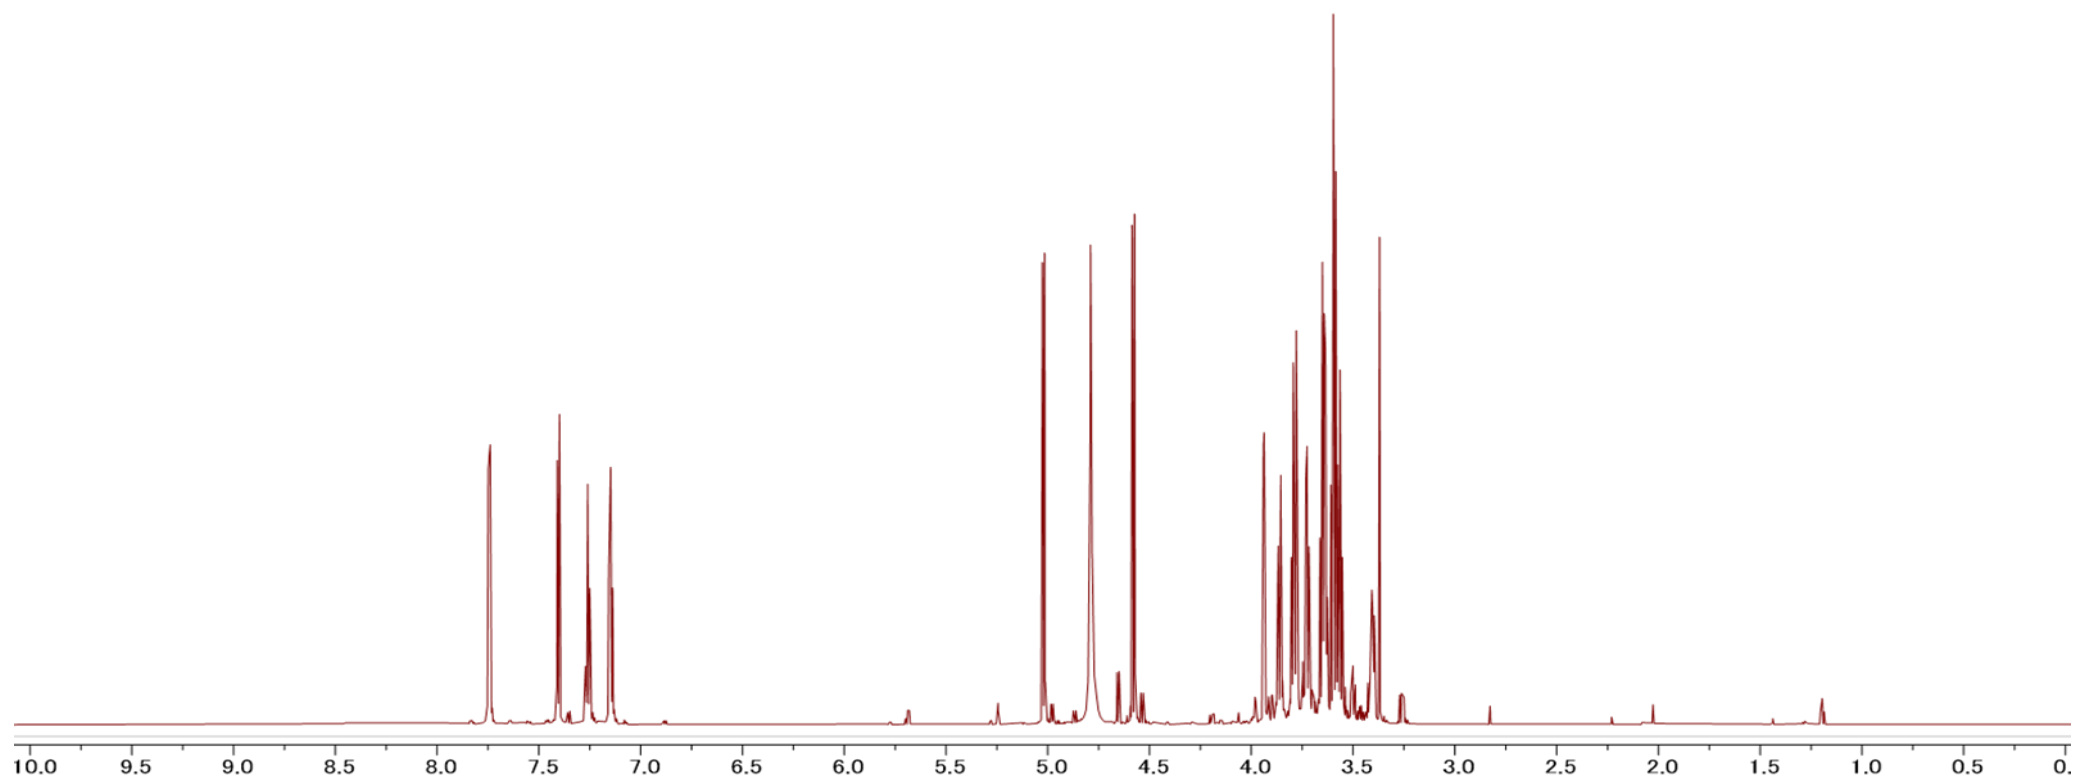

<sup>13</sup>C-NMR (200 MHz, D<sub>2</sub>O) of 3-(β-D-Glucopyranosyloxy)-1*H*-indol-2-yl 1-thio-β-D-galactopyranoside (8b).

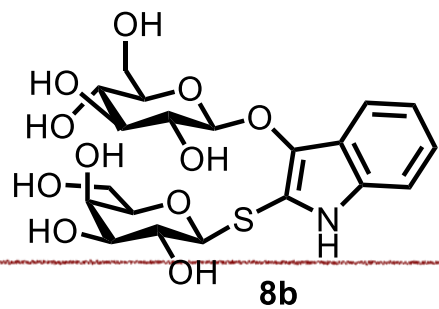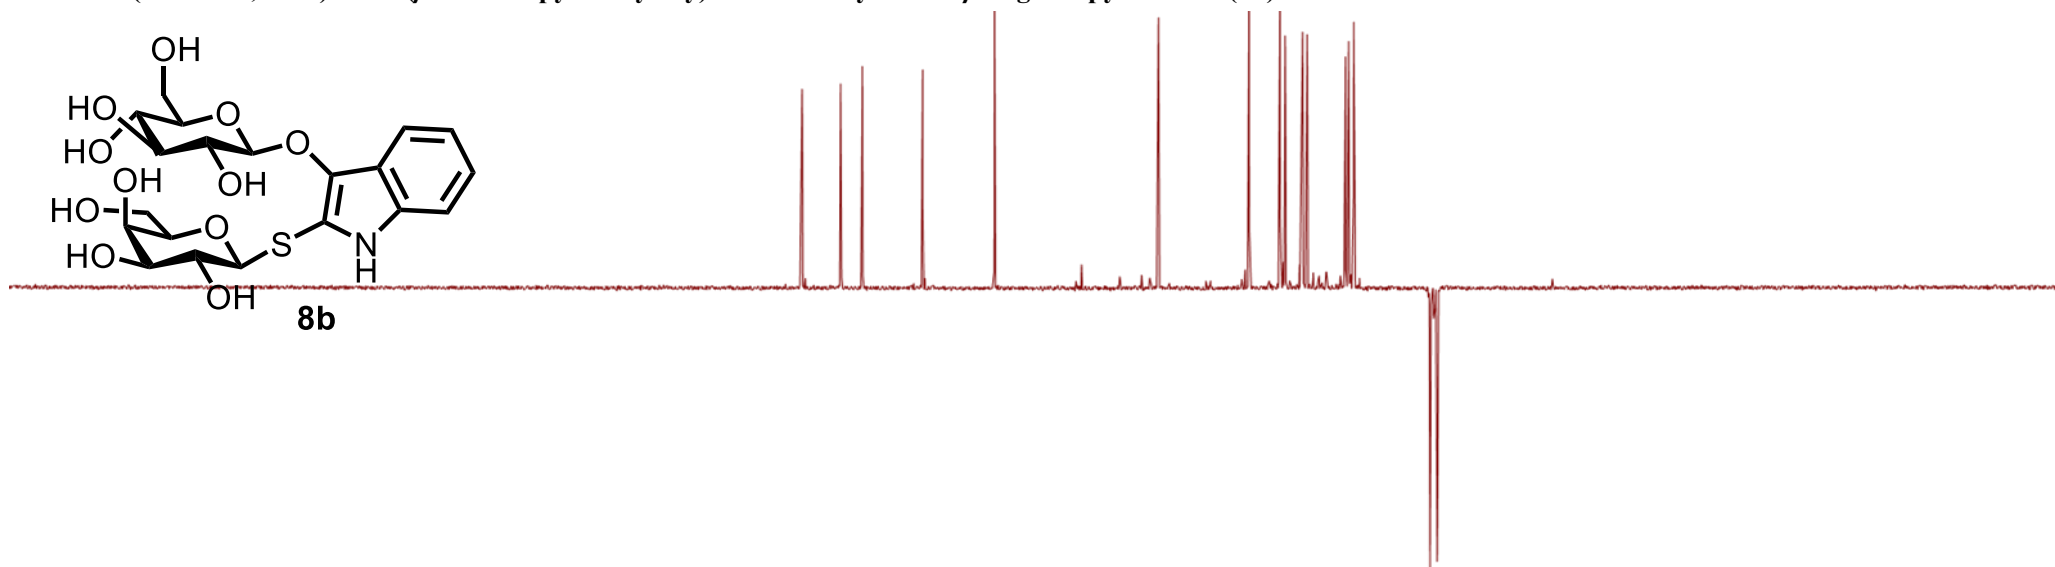

lbertone step6  
ngle pulse decoupled gated NOE

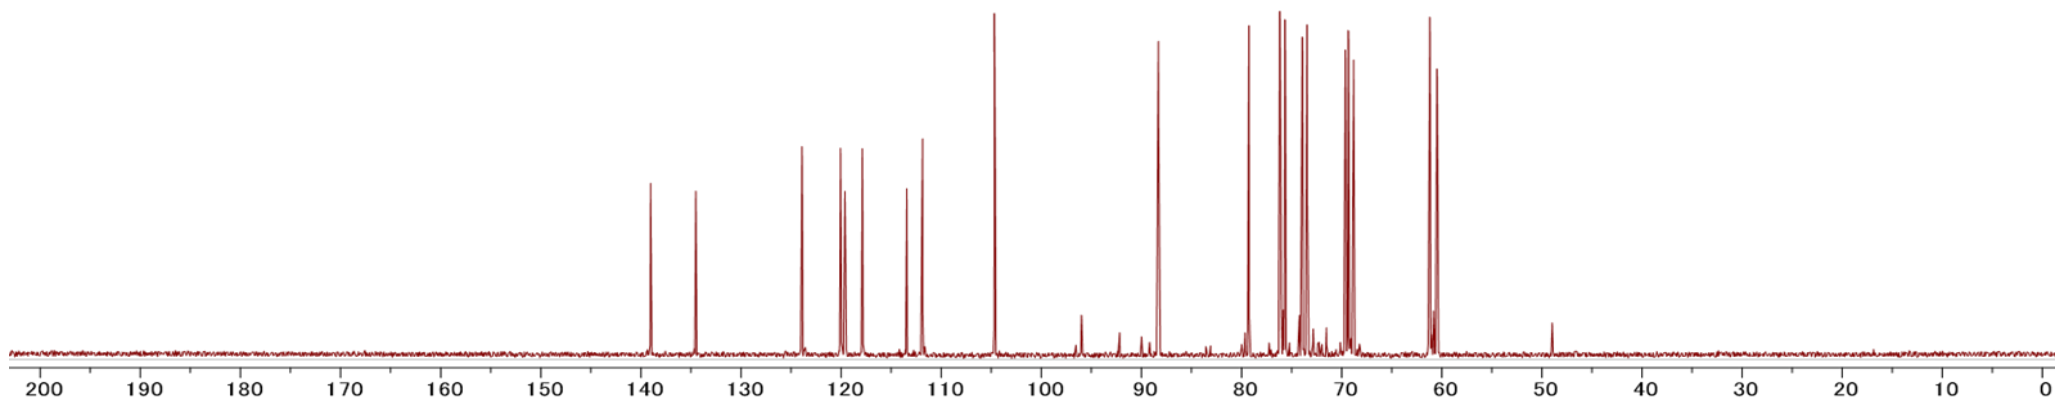

<sup>1</sup>H-NMR (800 MHz, D<sub>2</sub>O) of 3-(β-D-Glucopyranosyloxy) -1*H*-indol-2-yl 1-thio-β-D-mannopyranoside (8c).

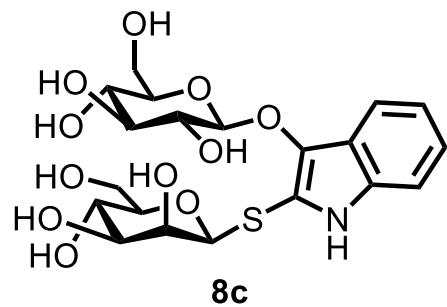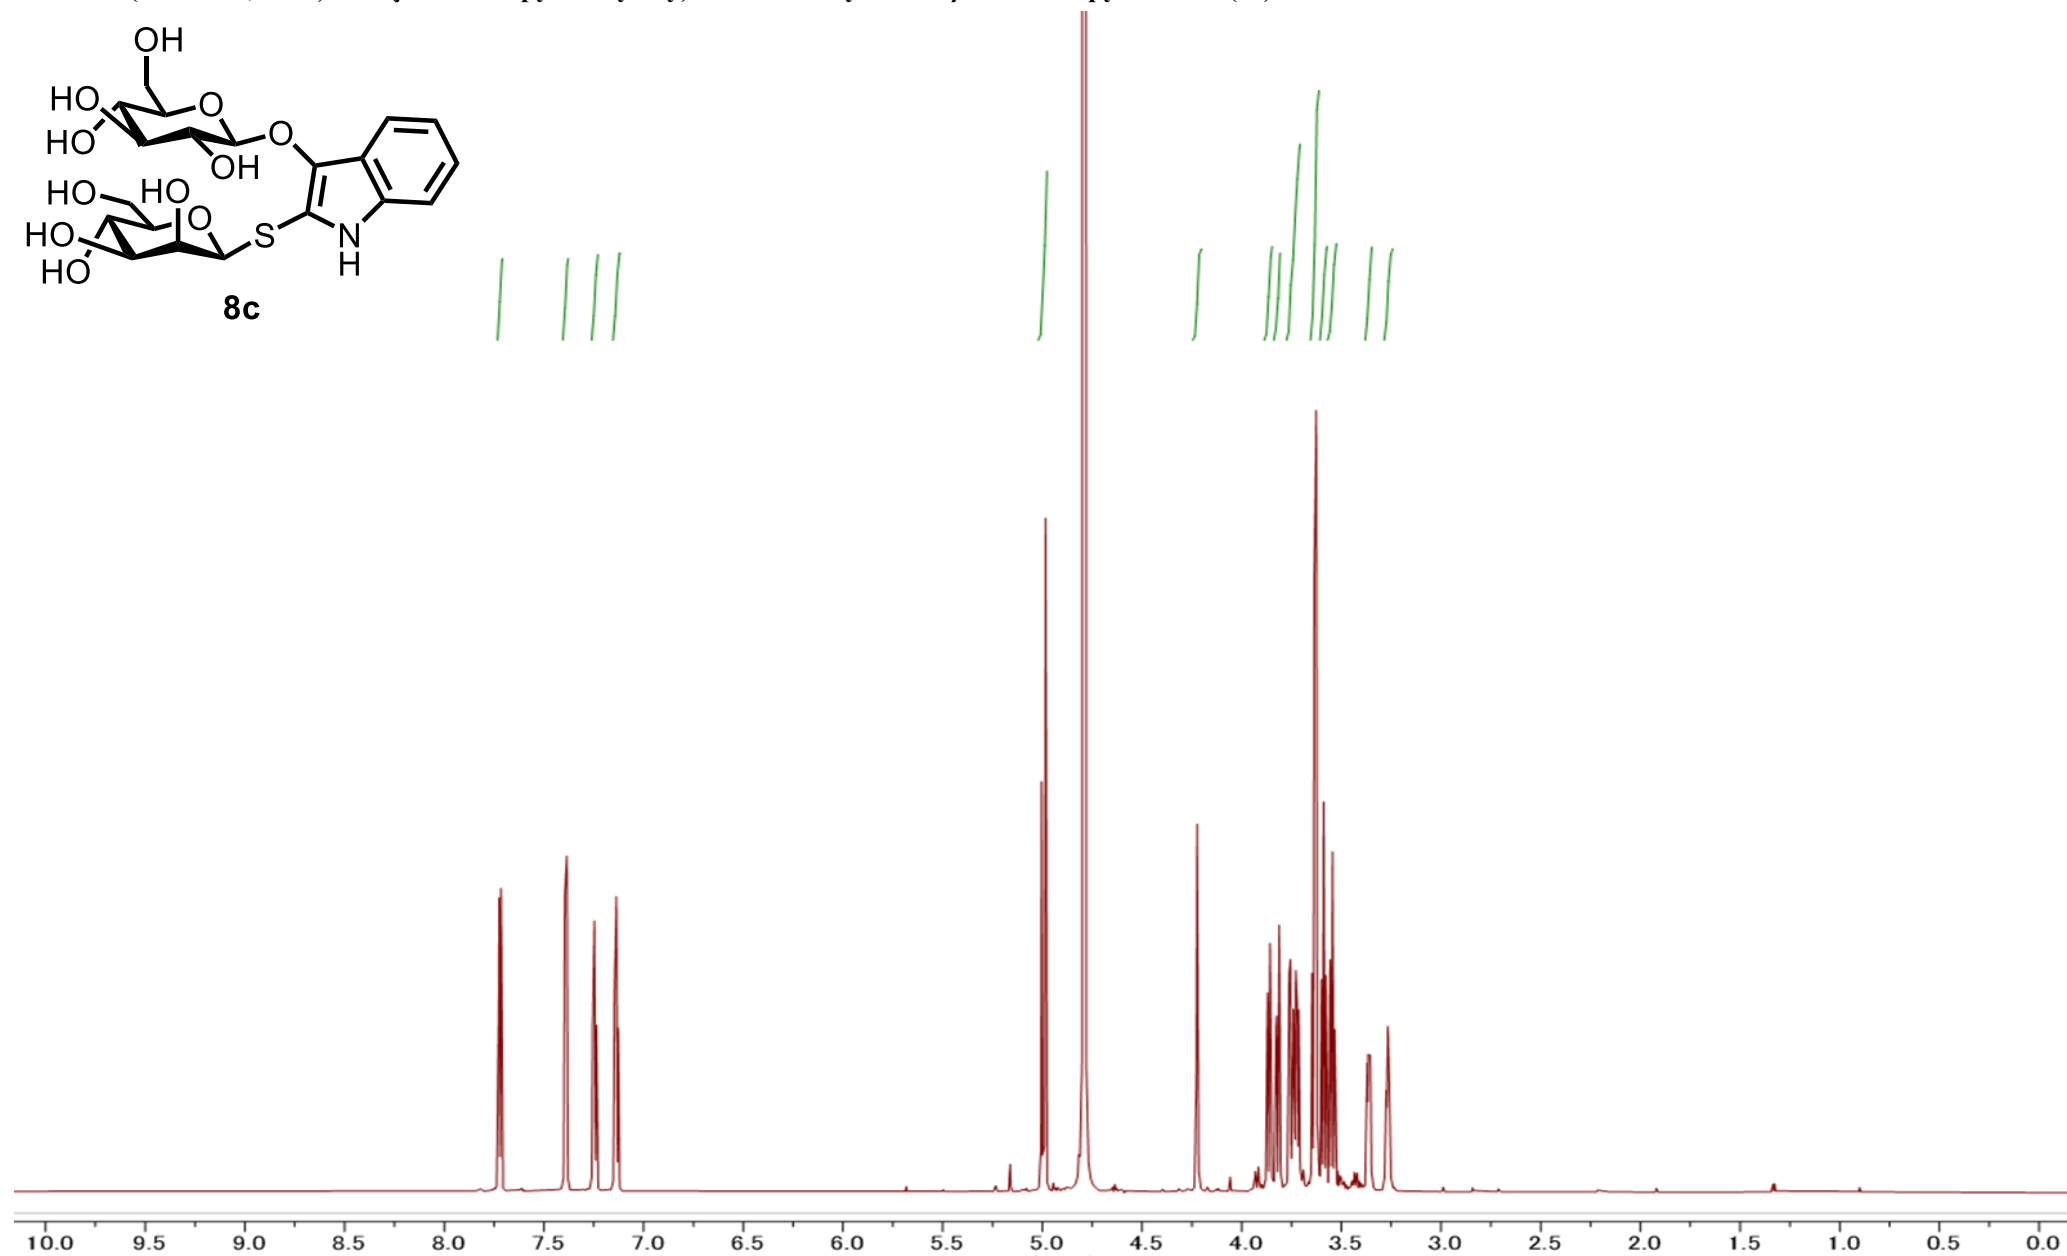

<sup>13</sup>C-NMR (200 MHz, D<sub>2</sub>O) of 3-(β-D-Glucopyranosyloxy) -1H-indol-2-yl 1-thio-β-D-mannopyranoside (8c).

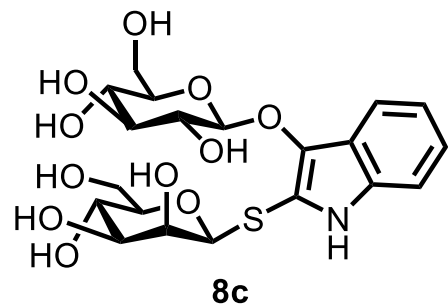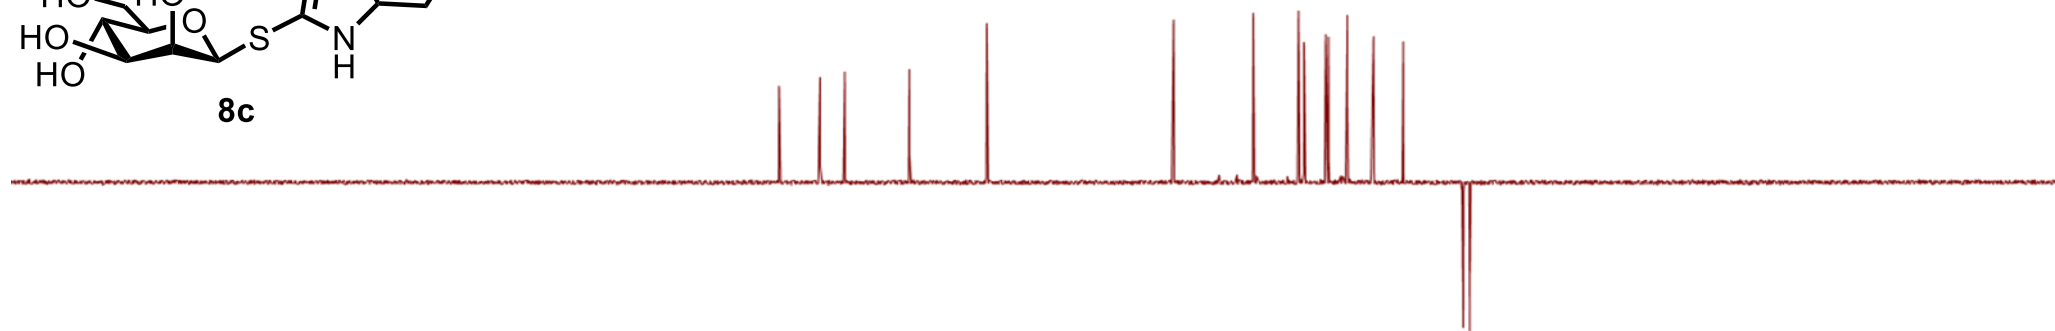

14-2025.41.fid

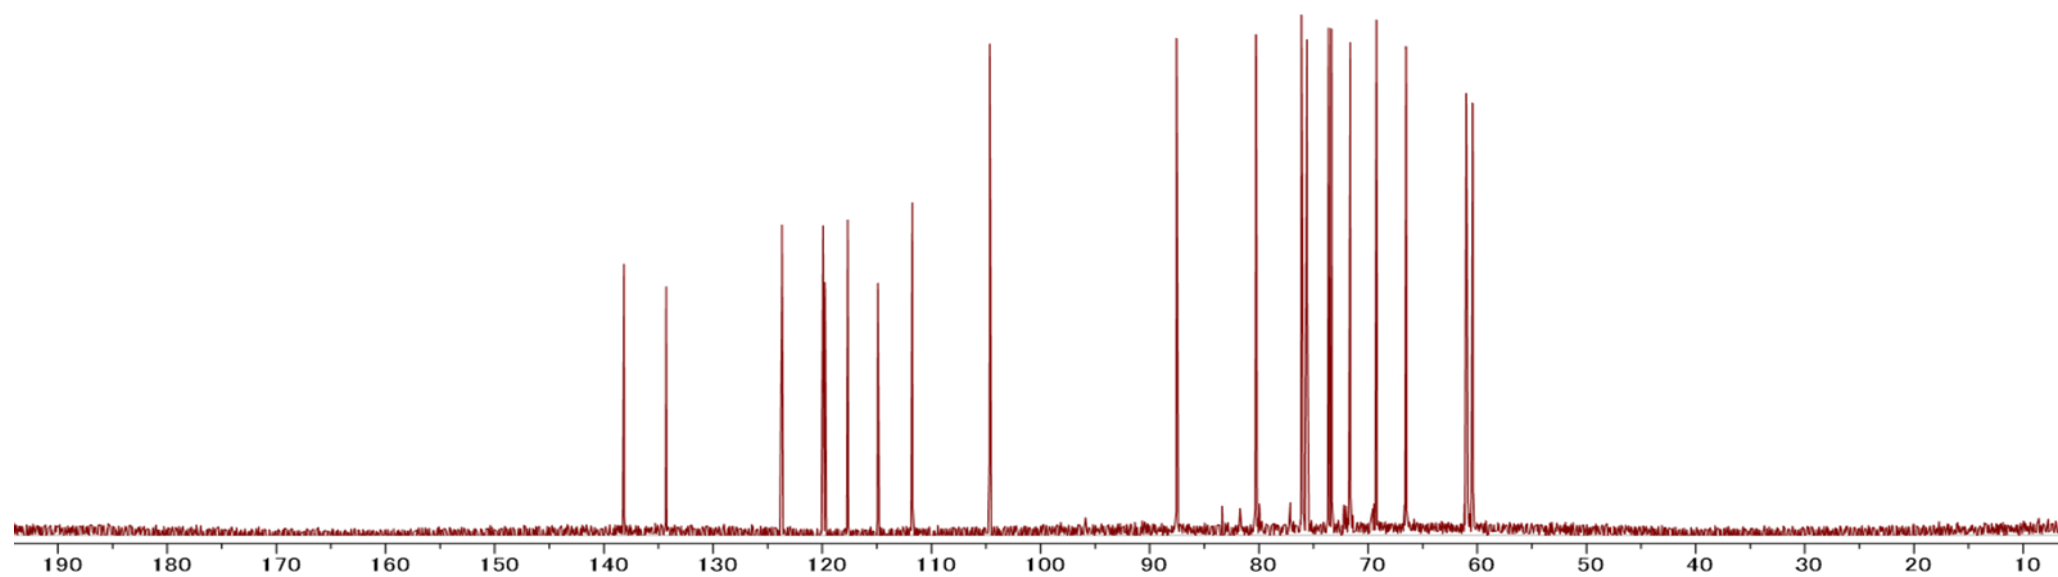

NOESY (800 MHz, D<sub>2</sub>O) of 3-( $\beta$ -D-Glucopyranosyloxy)-1*H*-indol-2-yl 1-thio- $\beta$ -D-mannopyranoside (8c).

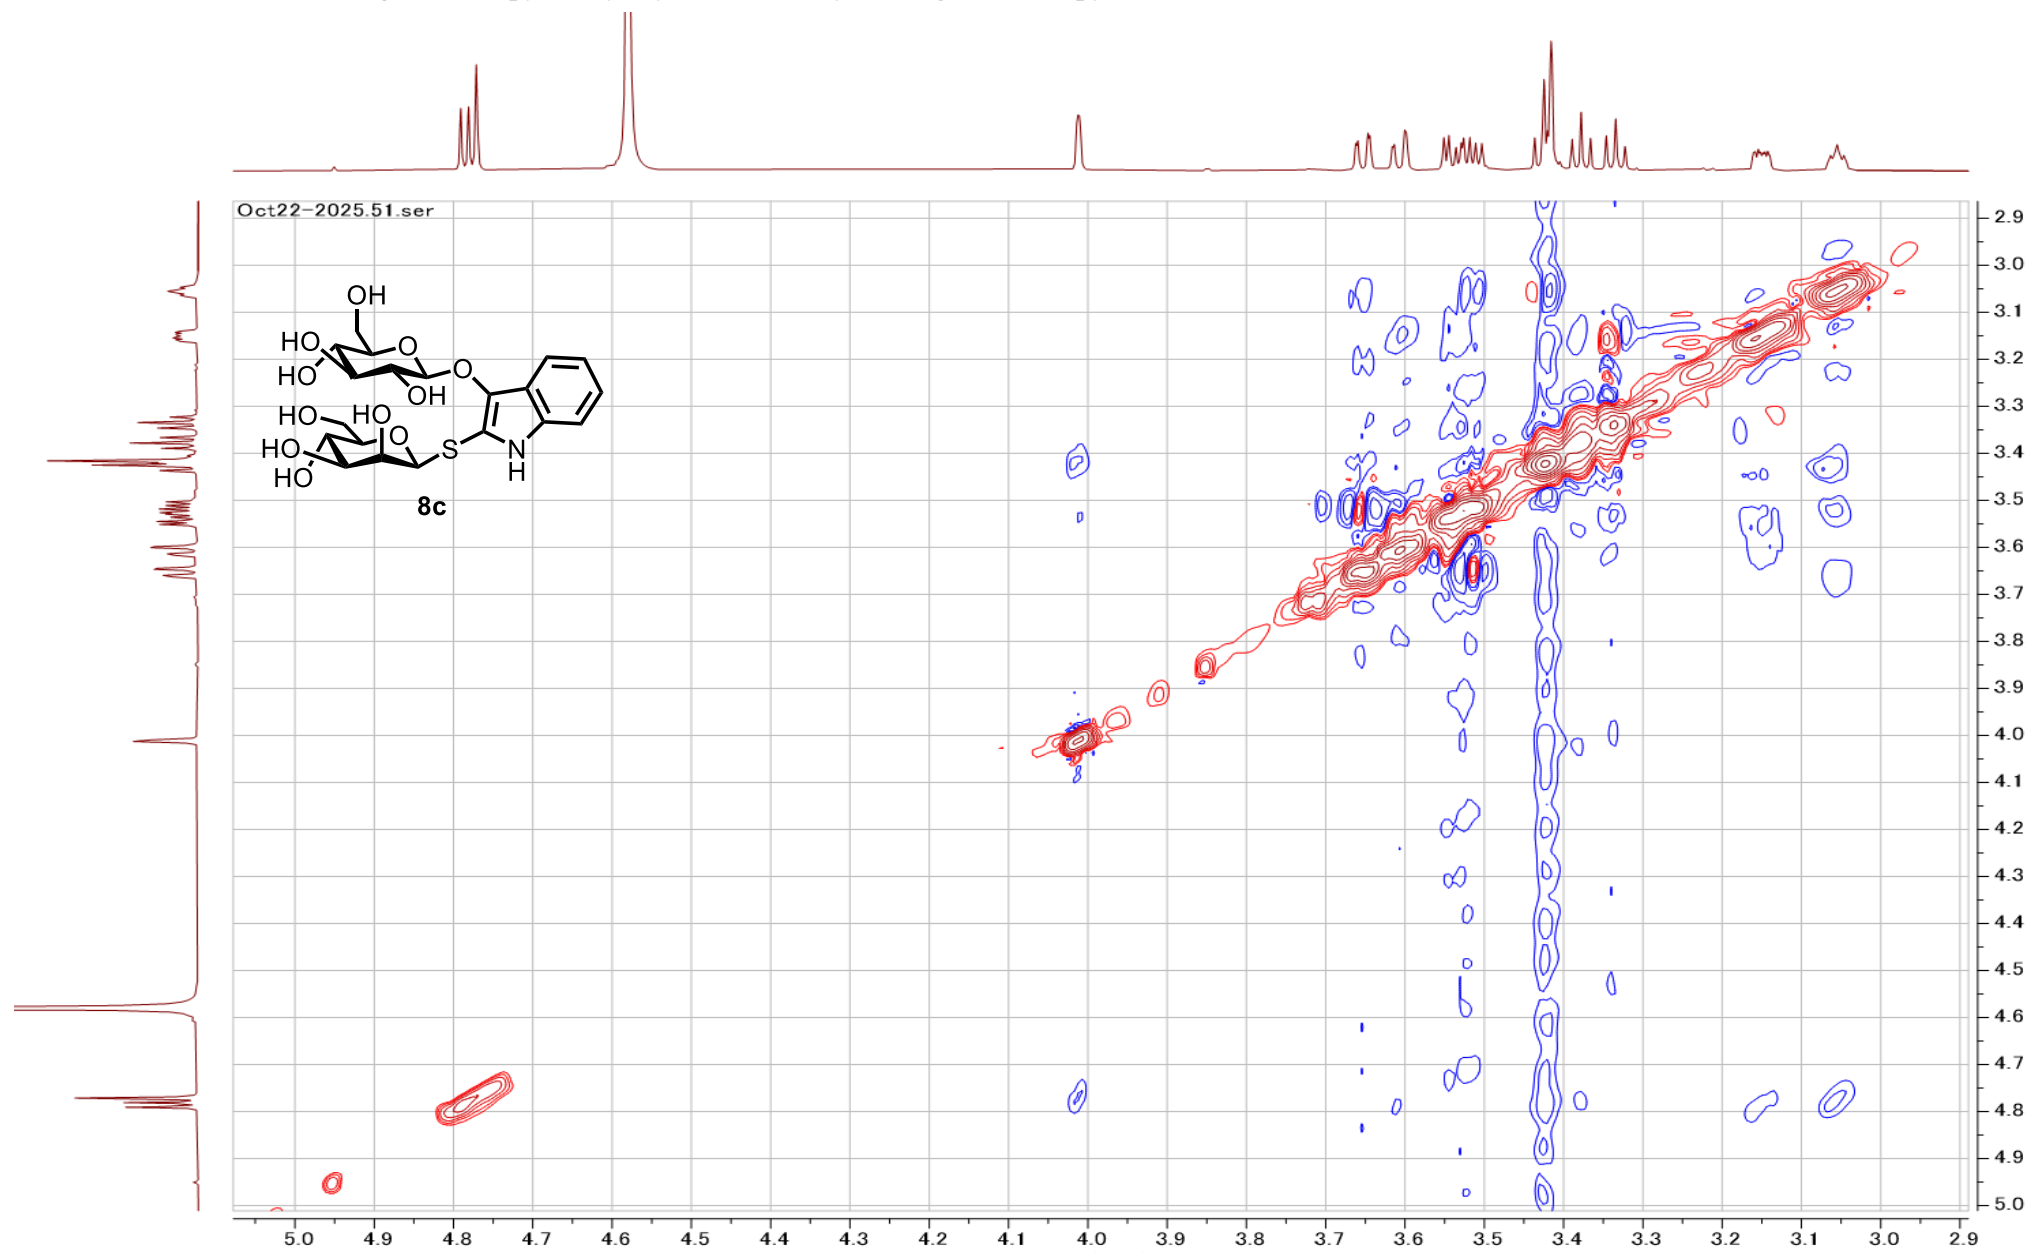

<sup>1</sup>H-NMR (800 MHz, D<sub>2</sub>O) of 3-(β-D-Glucopyranosyloxy)-1*H*-indol-2-yl 1-thio-β-D-xylopyranoside (8d).

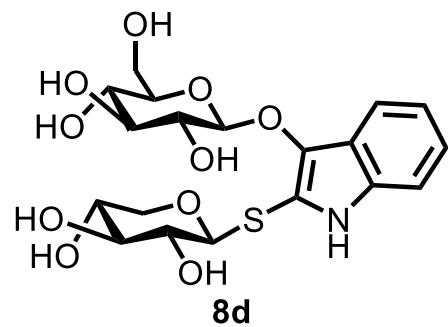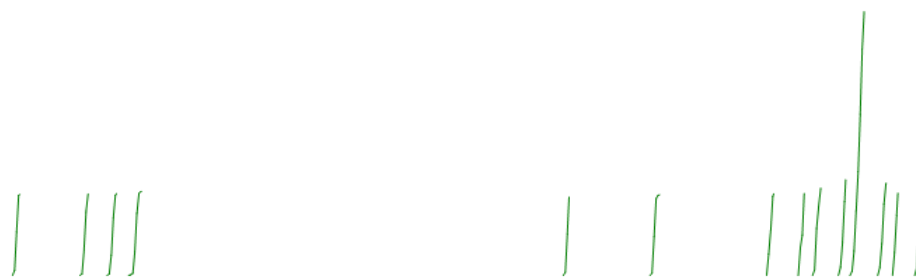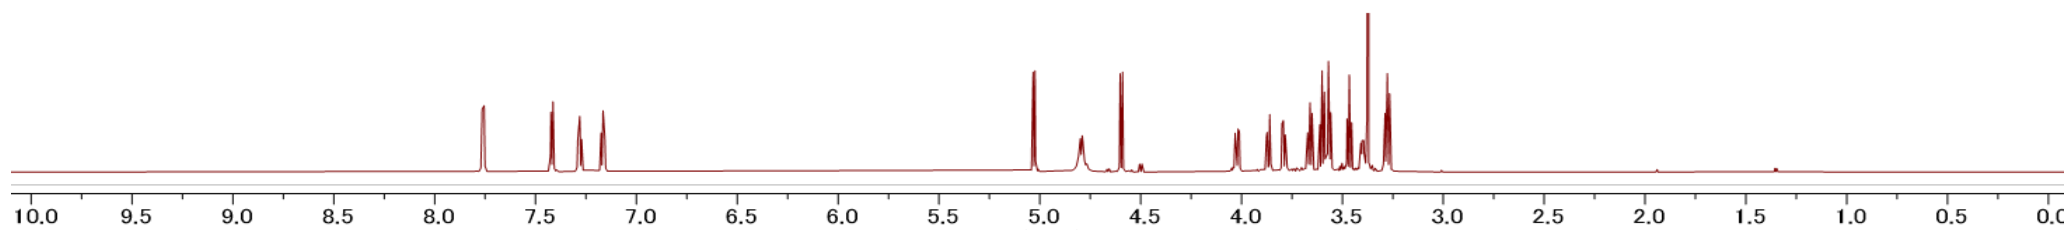

$^{13}\text{C}$ -NMR (200 MHz,  $\text{D}_2\text{O}$ ) of 3-( $\beta$ -D-Glucopyranosyloxy)-1*H*-indol-2-yl 1-thio- $\beta$ -D-xylopyranoside (**8d**).

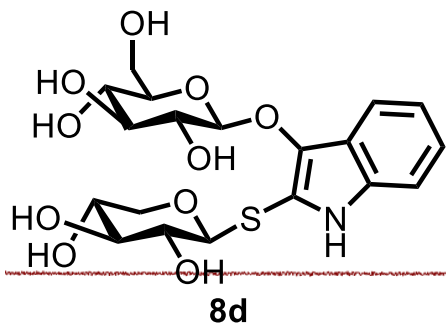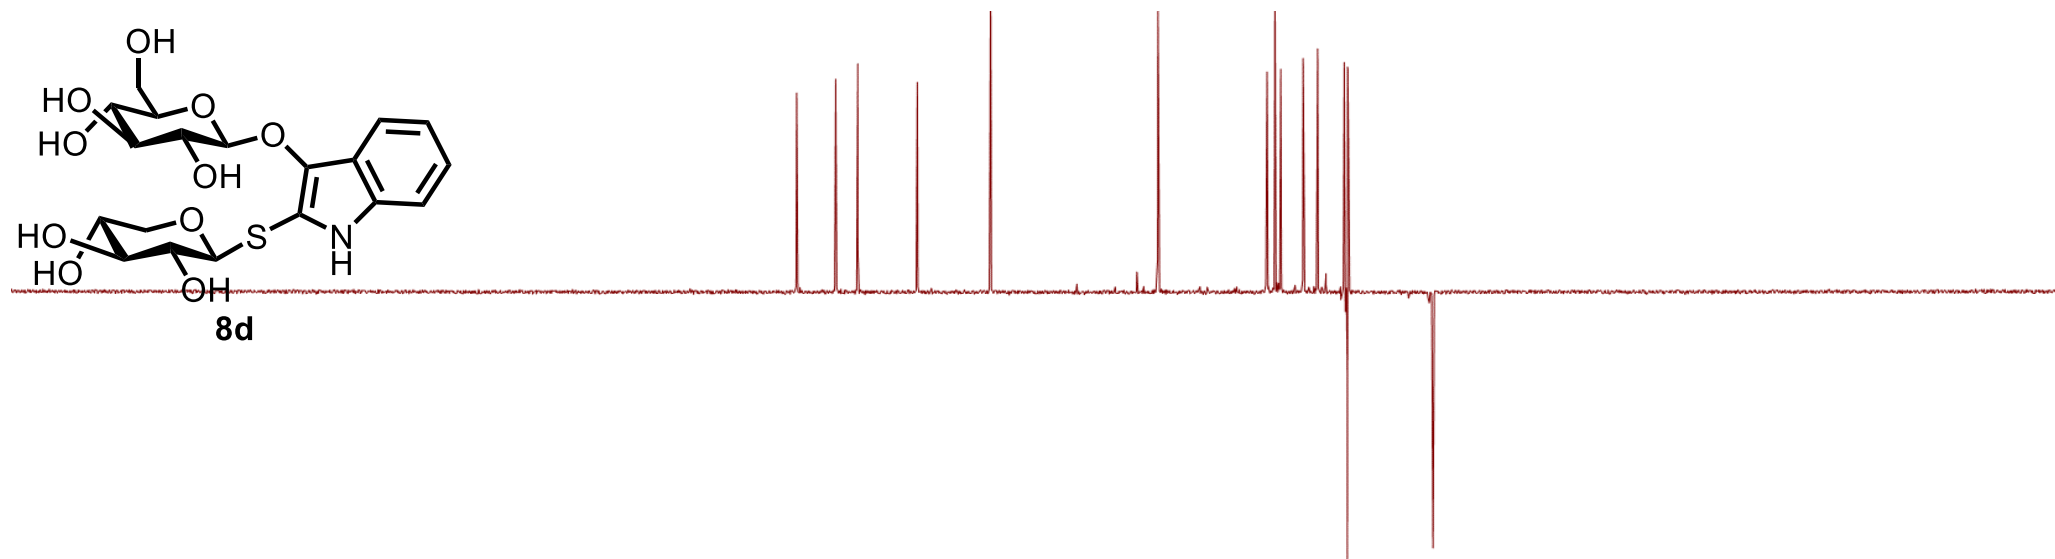

31uSXyl  
ngle pulse decoupled gated NOE

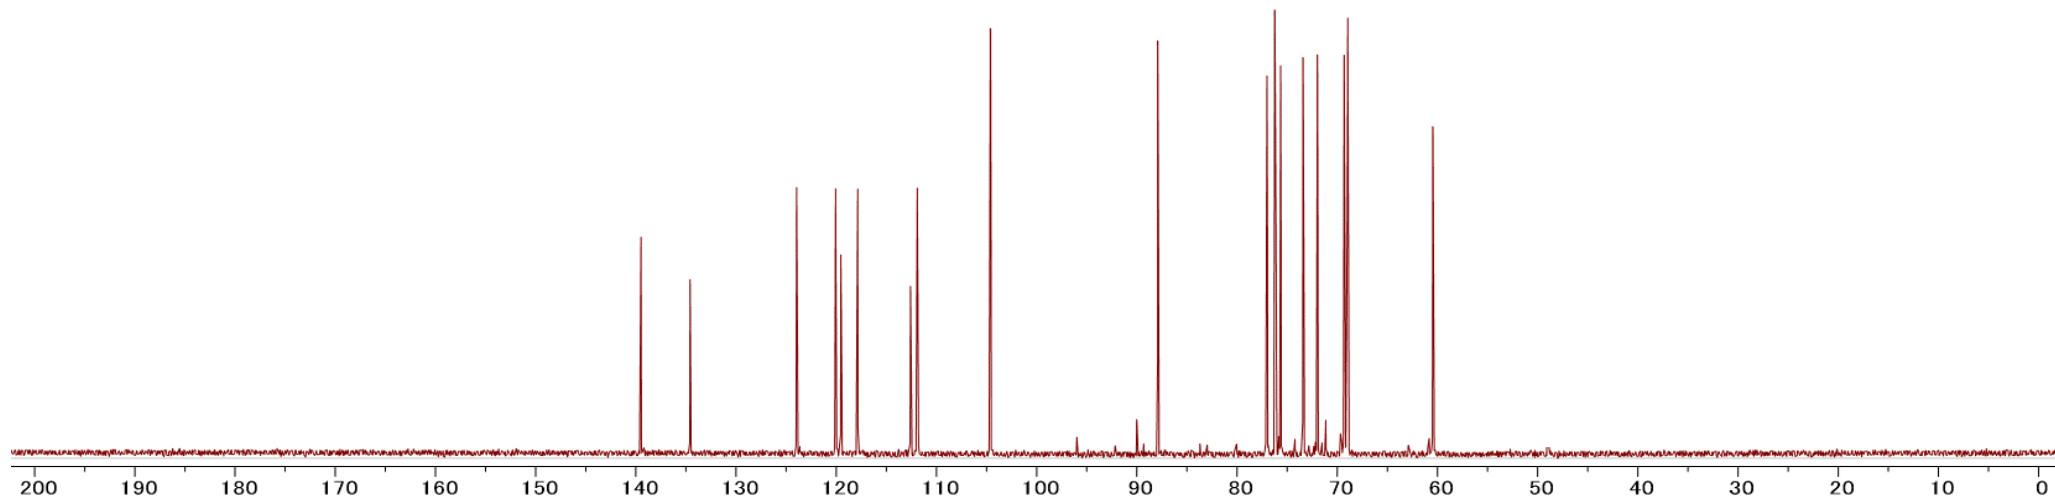

<sup>1</sup>H-NMR (800 MHz, D<sub>2</sub>O) of 3-(β-D-Glucopyranosyloxy)-1H-indol-2-yl 1-thio-β-D-arabinopyranoside (8e).

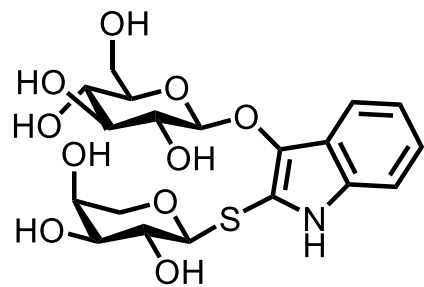

**8e**

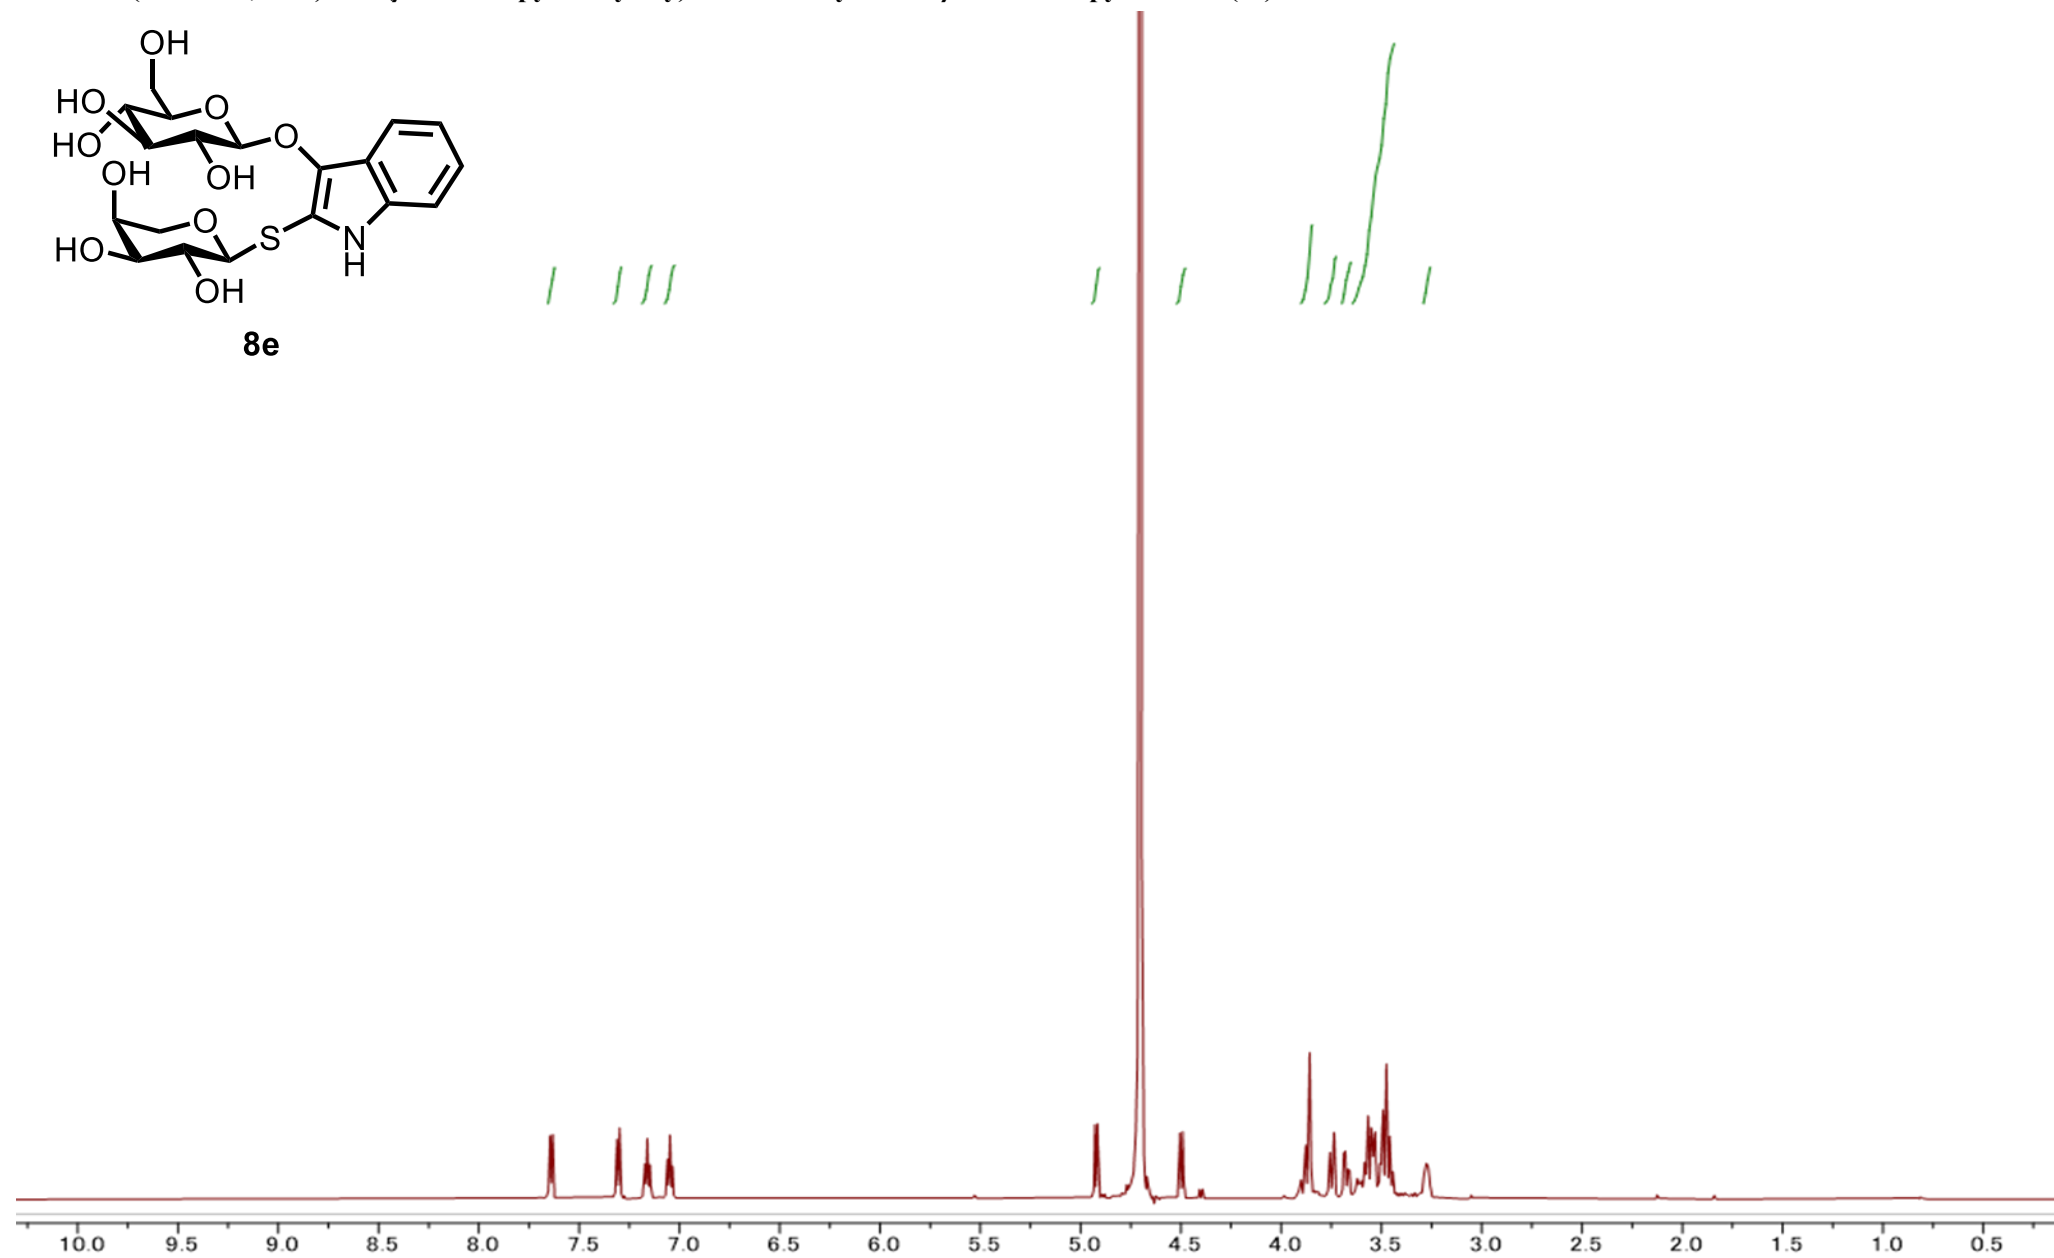

<sup>13</sup>C-NMR (200 MHz, D<sub>2</sub>O) of 3-(β-D-Glucopyranosyloxy)-1*H*-indol-2-yl 1-thio-β-D-arabinopyranoside (8e).

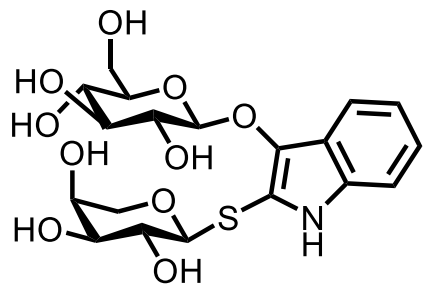

8e

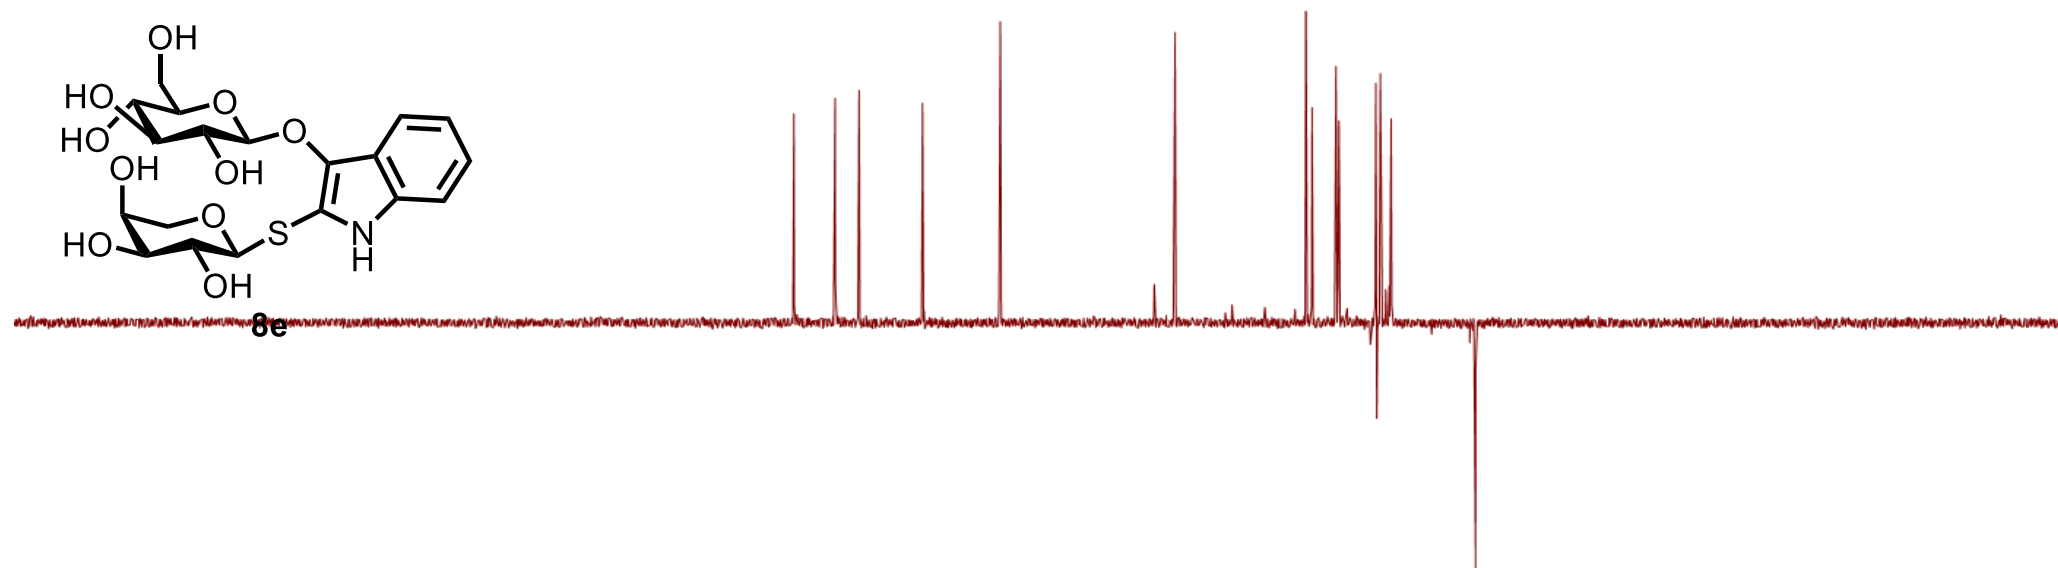

st27-2022.2.fid

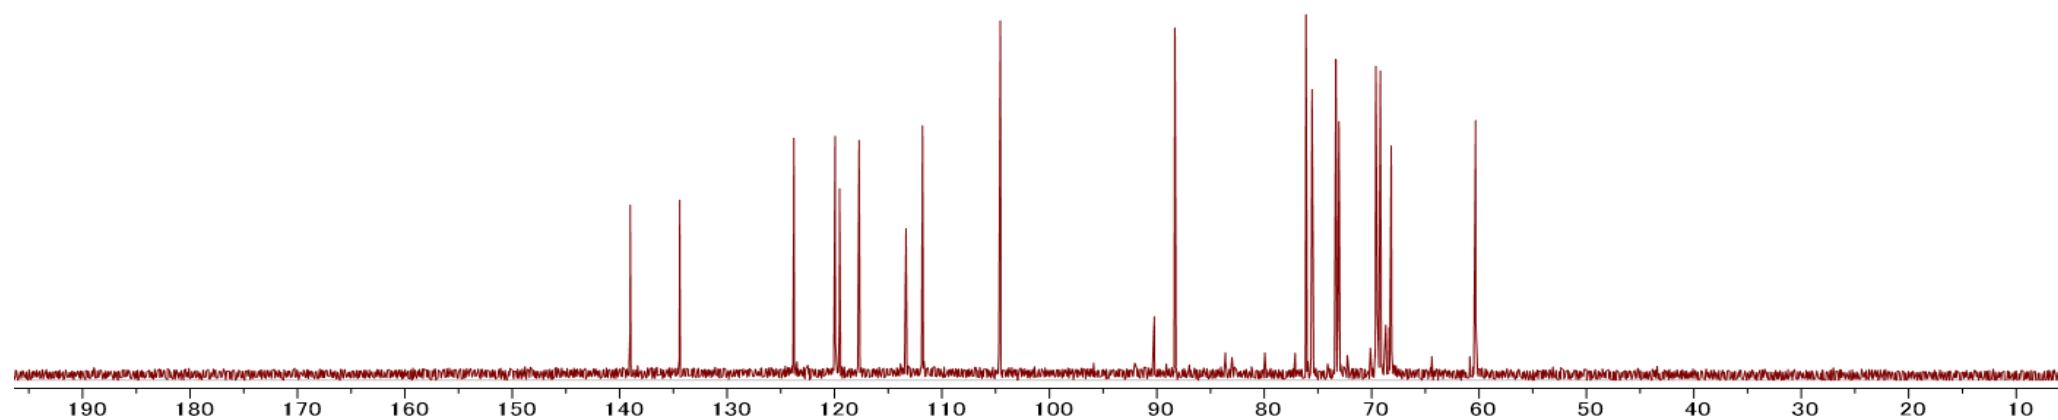

**<sup>1</sup>H-NMR (800 MHz, D<sub>2</sub>O) of 3-(β-D-Glucopyranosyloxy)-1*H*-indol-2-yl 1-thio-β-D-maltopyranoside (8f).**

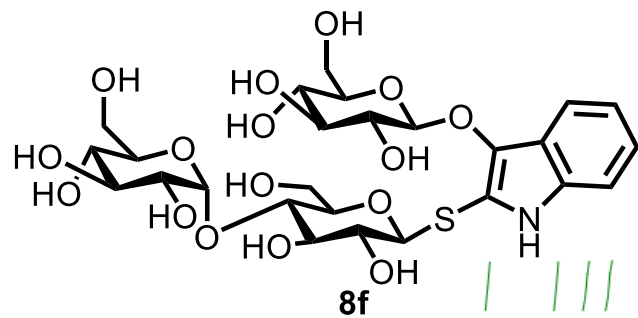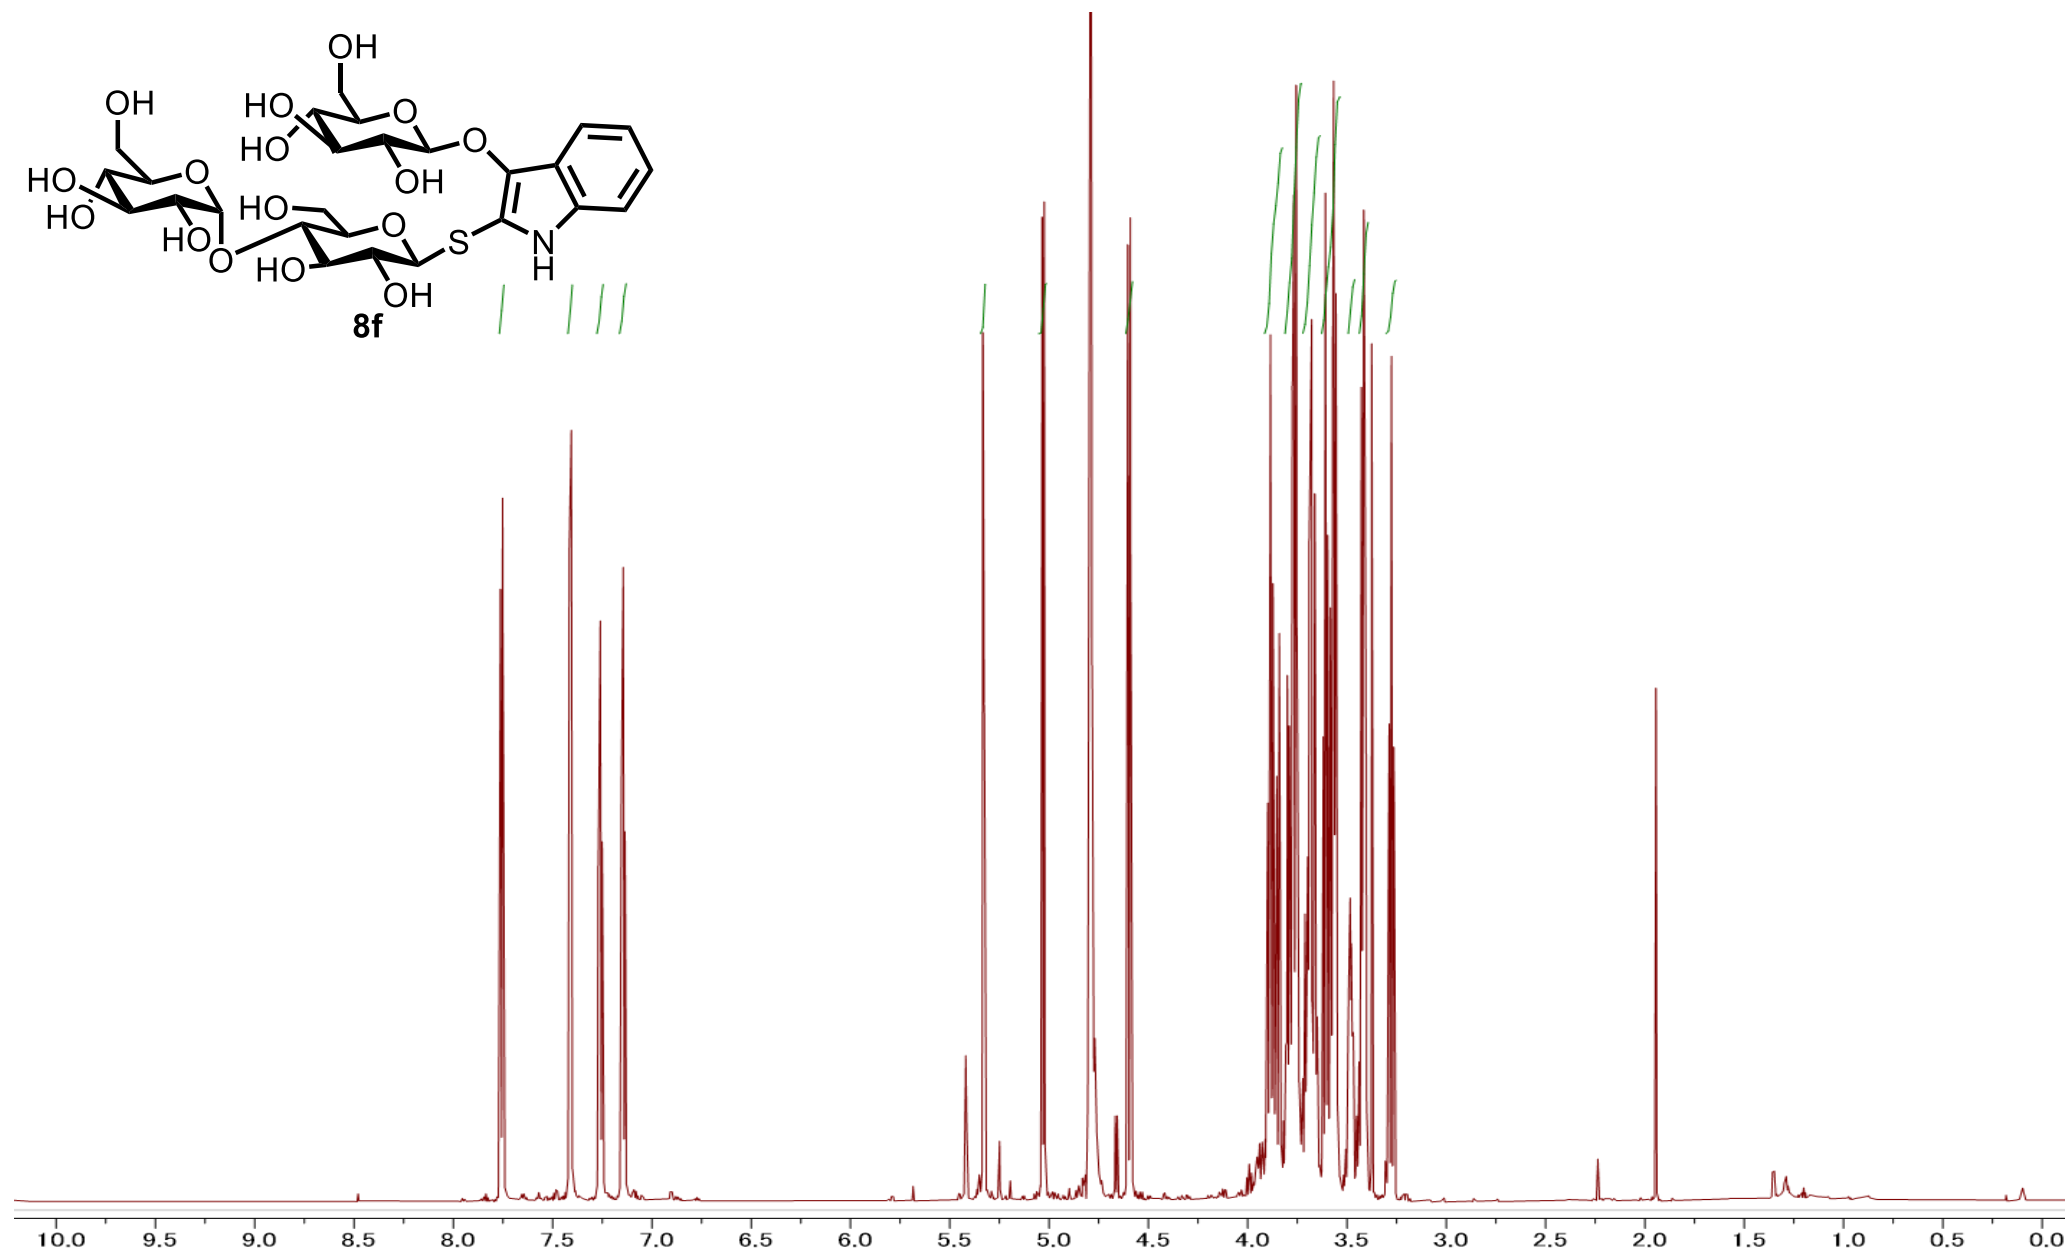

<sup>13</sup>C-NMR (200 MHz, D<sub>2</sub>O) of 3-(β-D-Glucopyranosyloxy)-1*H*-indol-2-yl 1-thio-β-D-maltopyranoside (8f).

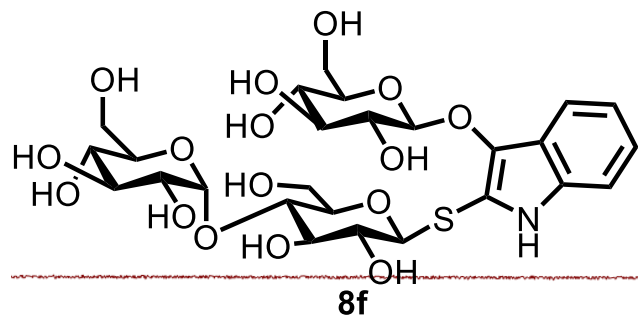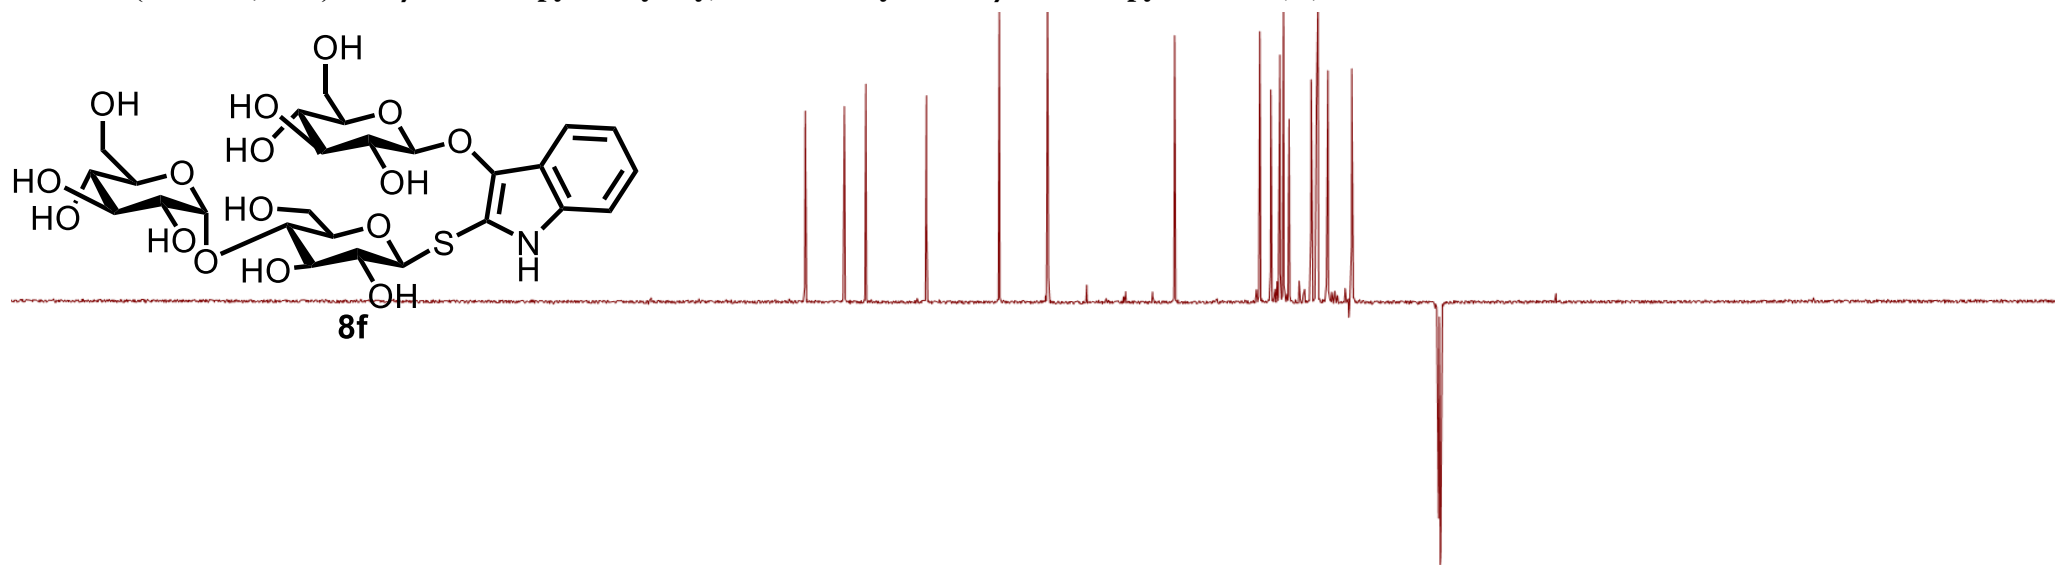

<sup>1</sup>GluSMal  
single pulse decoupled gated NOE

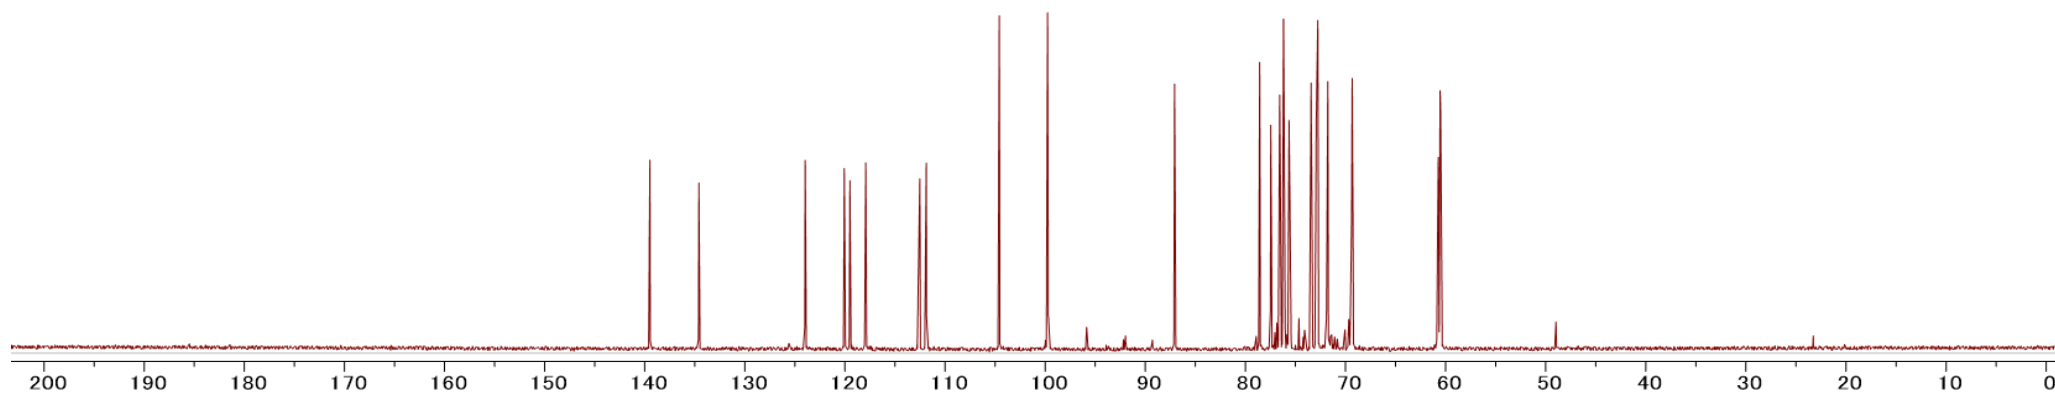

<sup>1</sup>H-NMR (800 MHz, CDCl<sub>3</sub>) of *N*-Acetyl-2-(ethylthio)-1*H*-indol-3-yl 2,3,4,6-tetra-*O*-propionyl-1-thio-β-*D*-glucopyranoside (15).

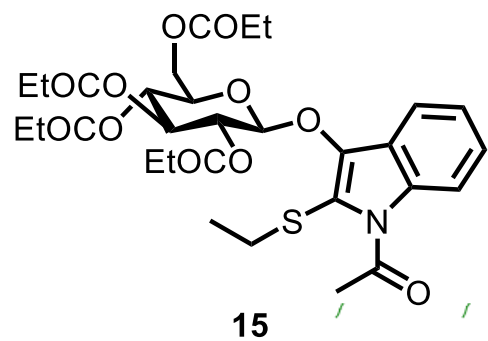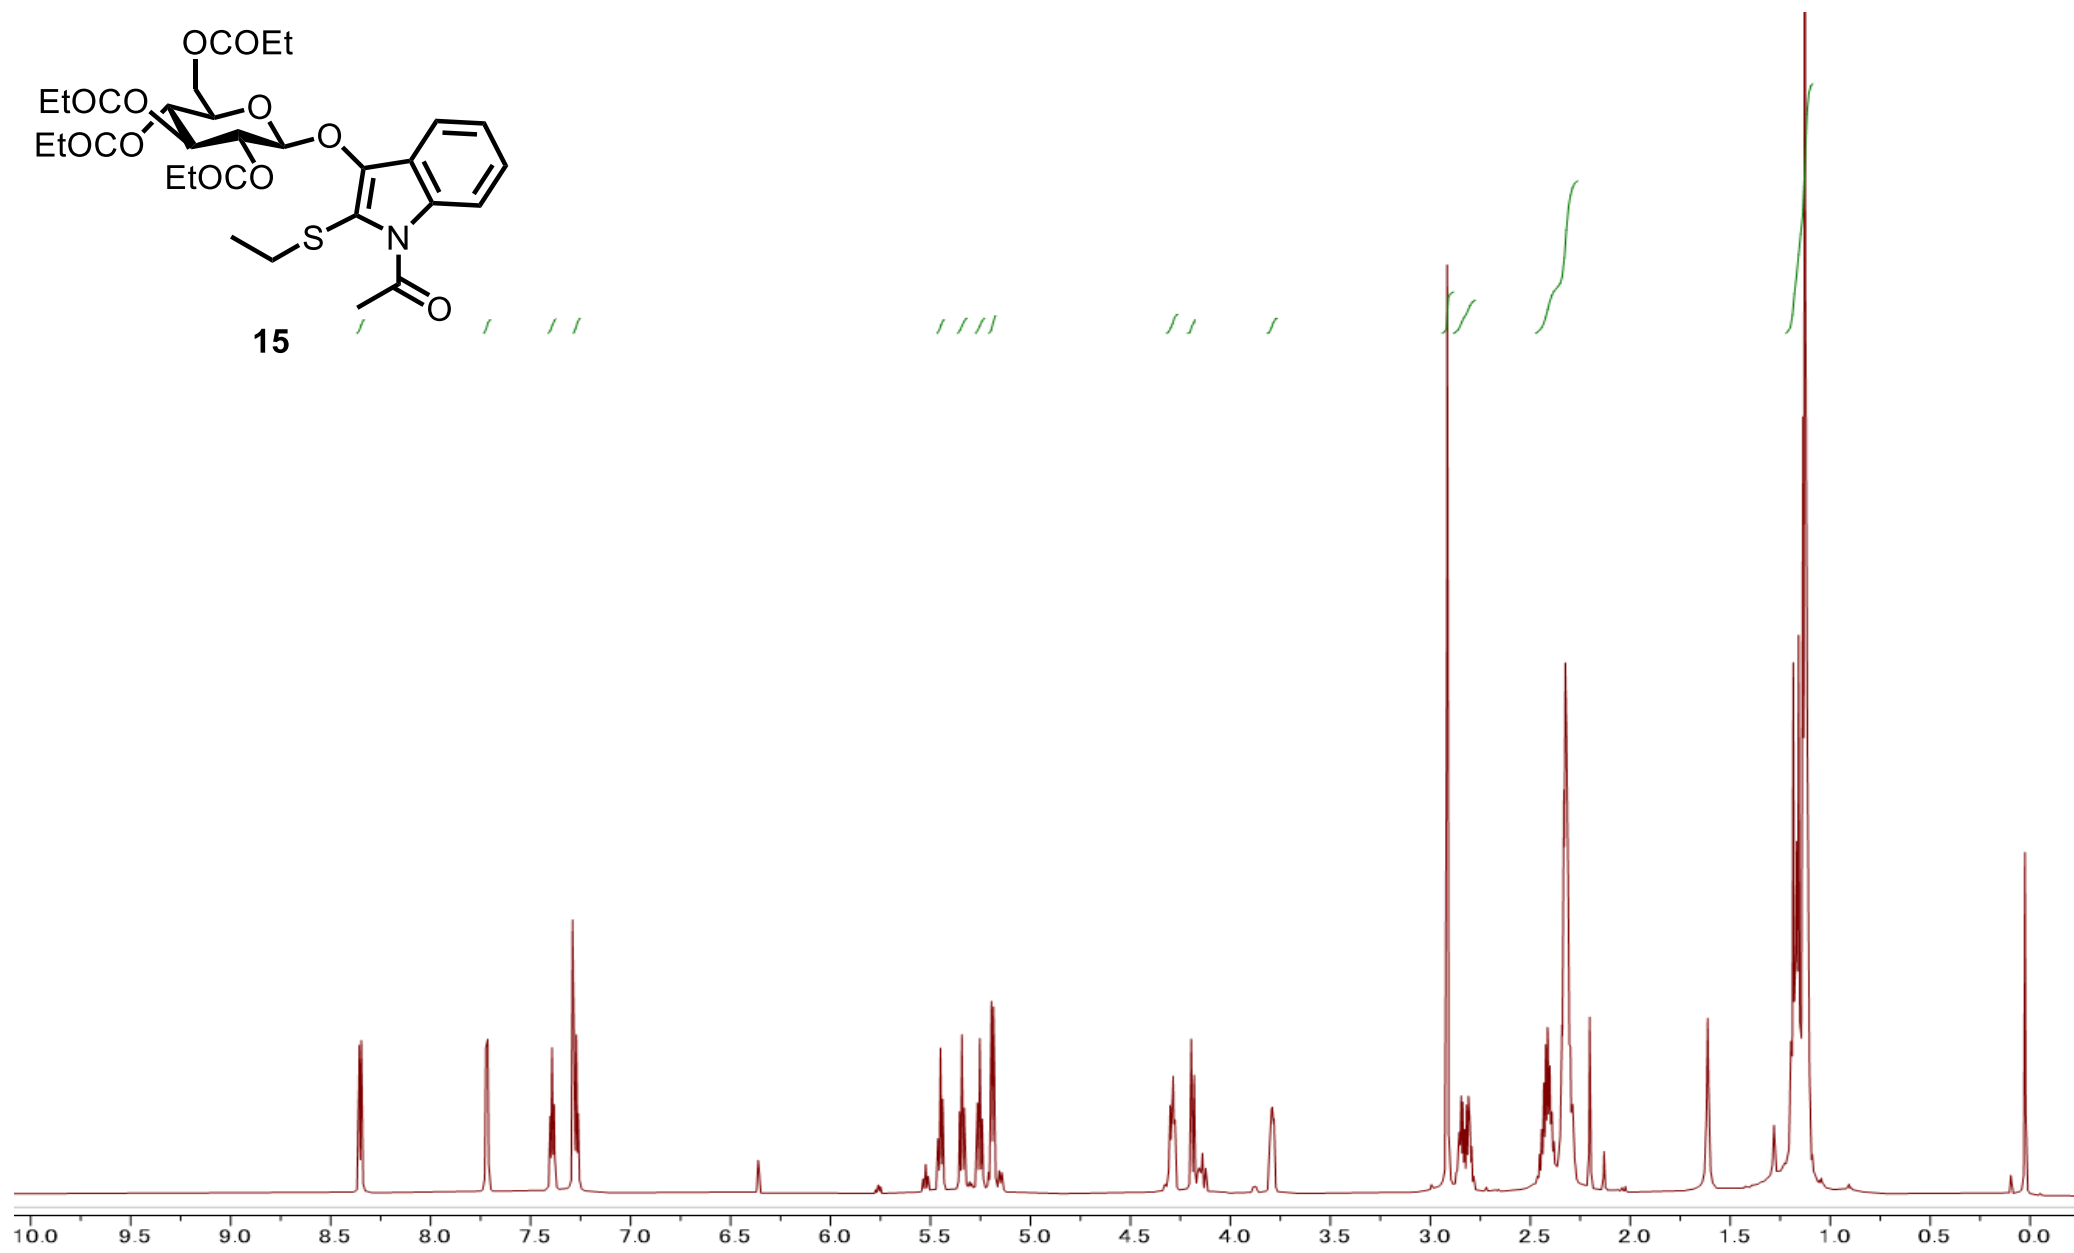

<sup>13</sup>C-NMR (200 MHz, CDCl<sub>3</sub>) of *N*-Acetyl-2-(ethylthio)-1*H*-indol-3-yl 2,3,4,6-tetra-*O*-propionyl-1-thio-β-*D*-glucopyranoside (15).

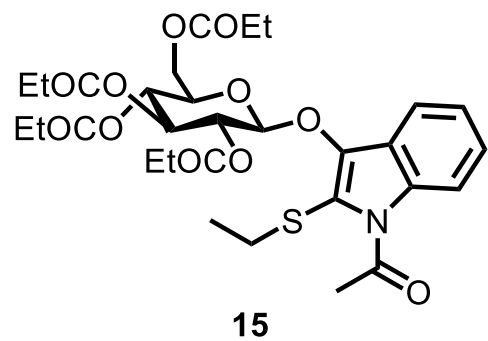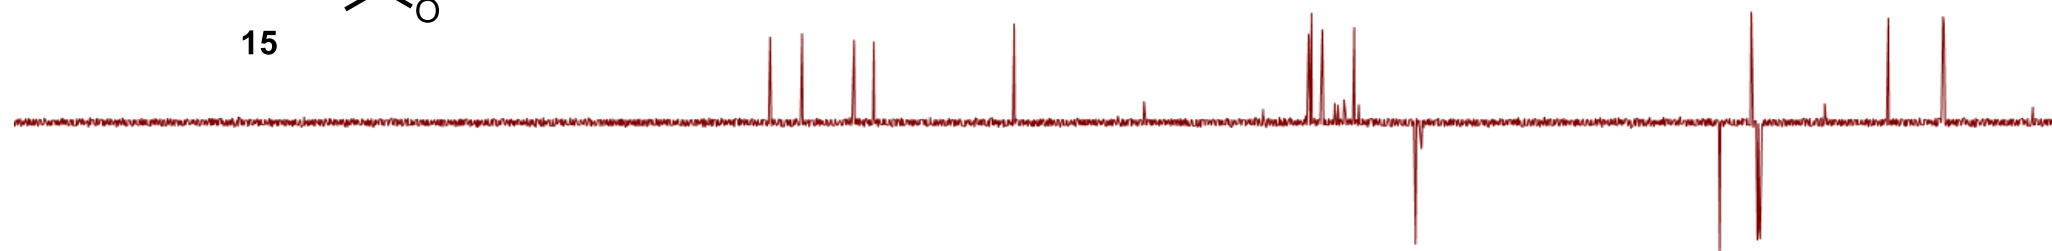

thoside OEt.11.fid

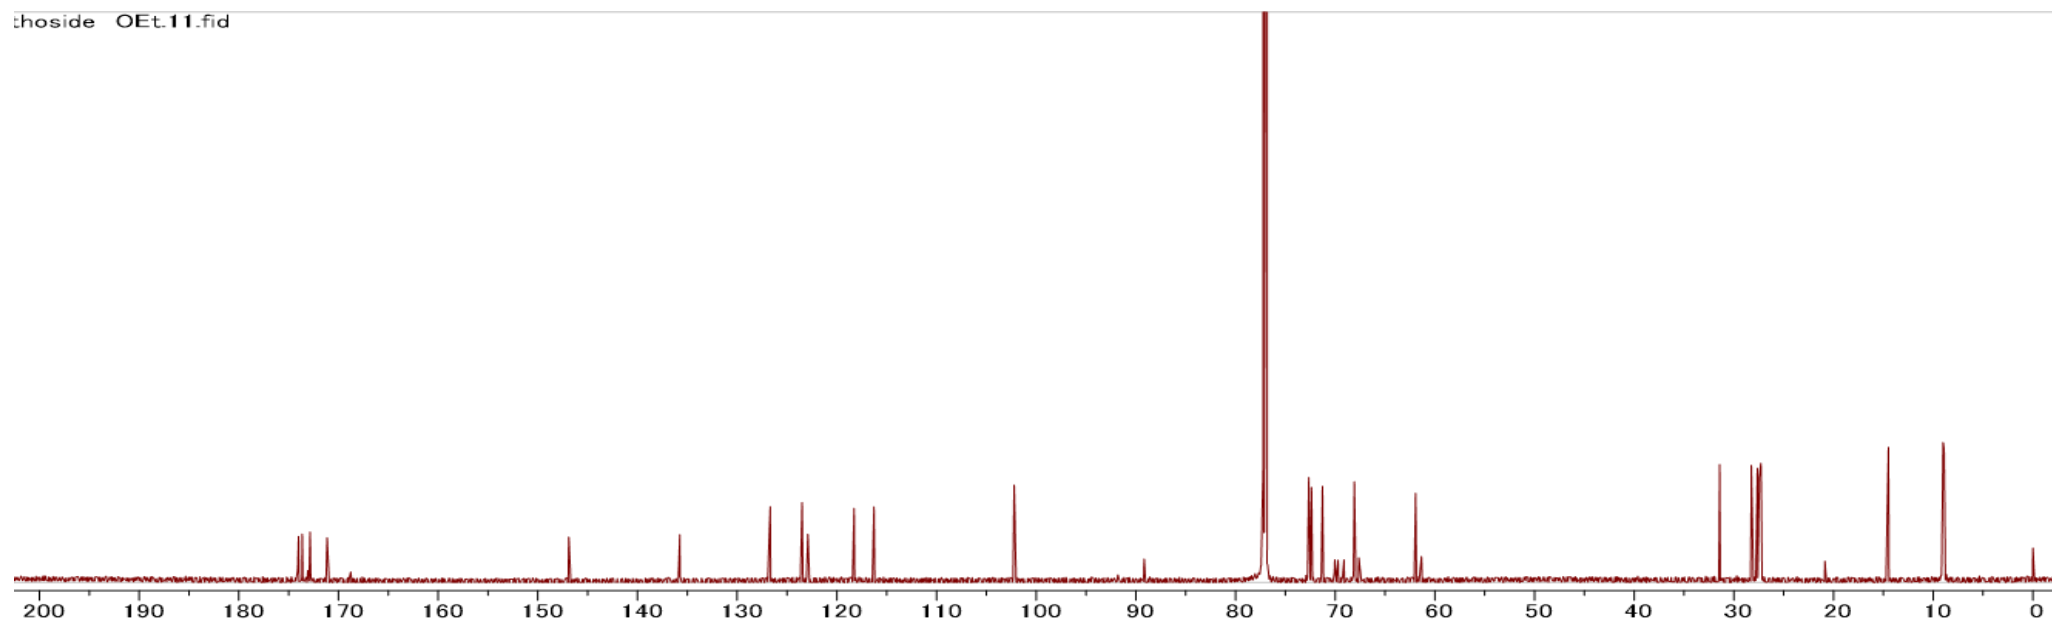

<sup>1</sup>H-NMR (800 MHz, CD<sub>3</sub>OD) of 2-(Ethylthio)-1*H*-indol-3-yl β-D-glucopyranoside (**8g**).

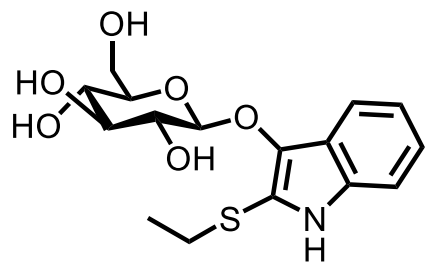

**8g**

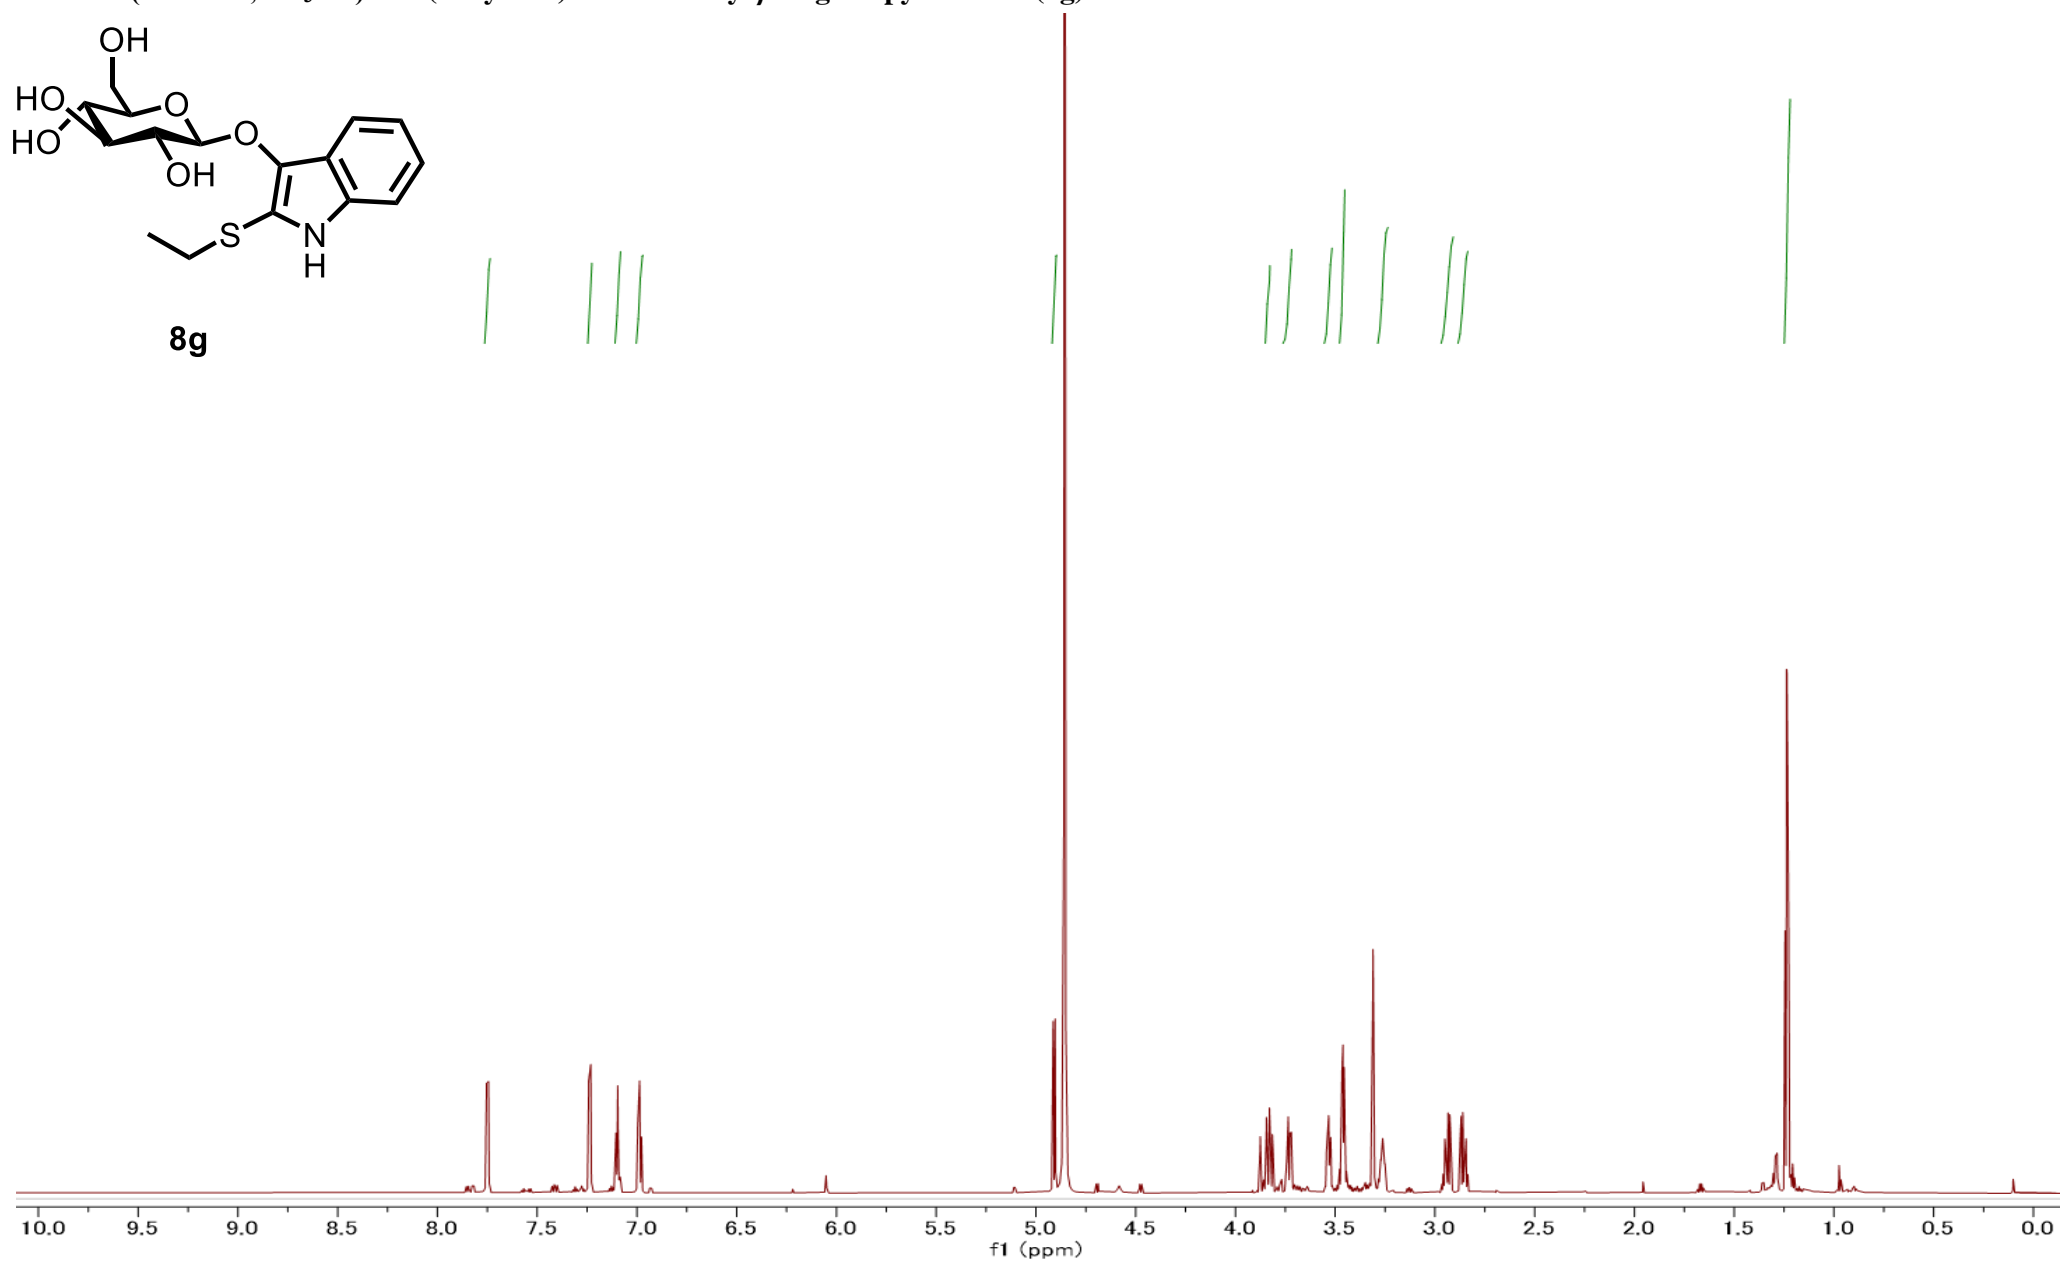

<sup>13</sup>C-NMR (200 MHz, CD<sub>3</sub>OD) of 2-(Ethylthio)-1*H*-indol-3-yl β-D-glucopyranoside (8g).

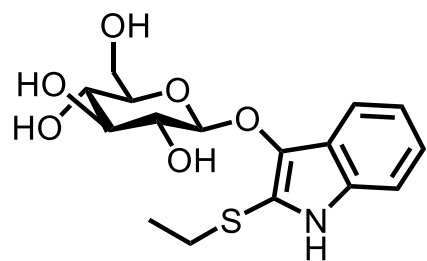

8g

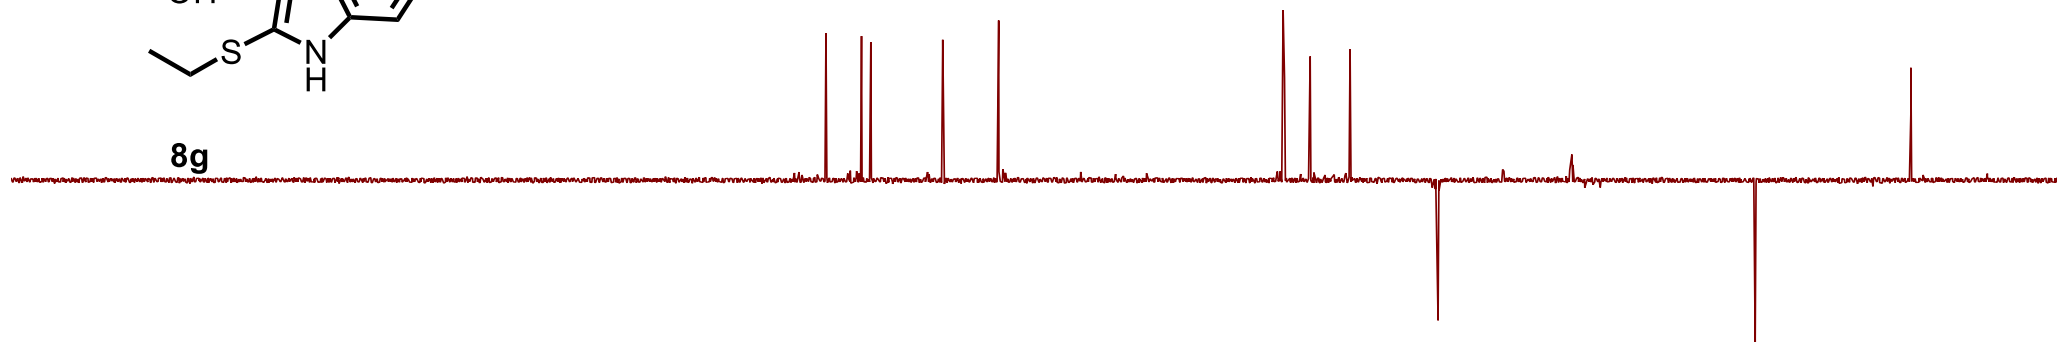

7-2025.2.fid

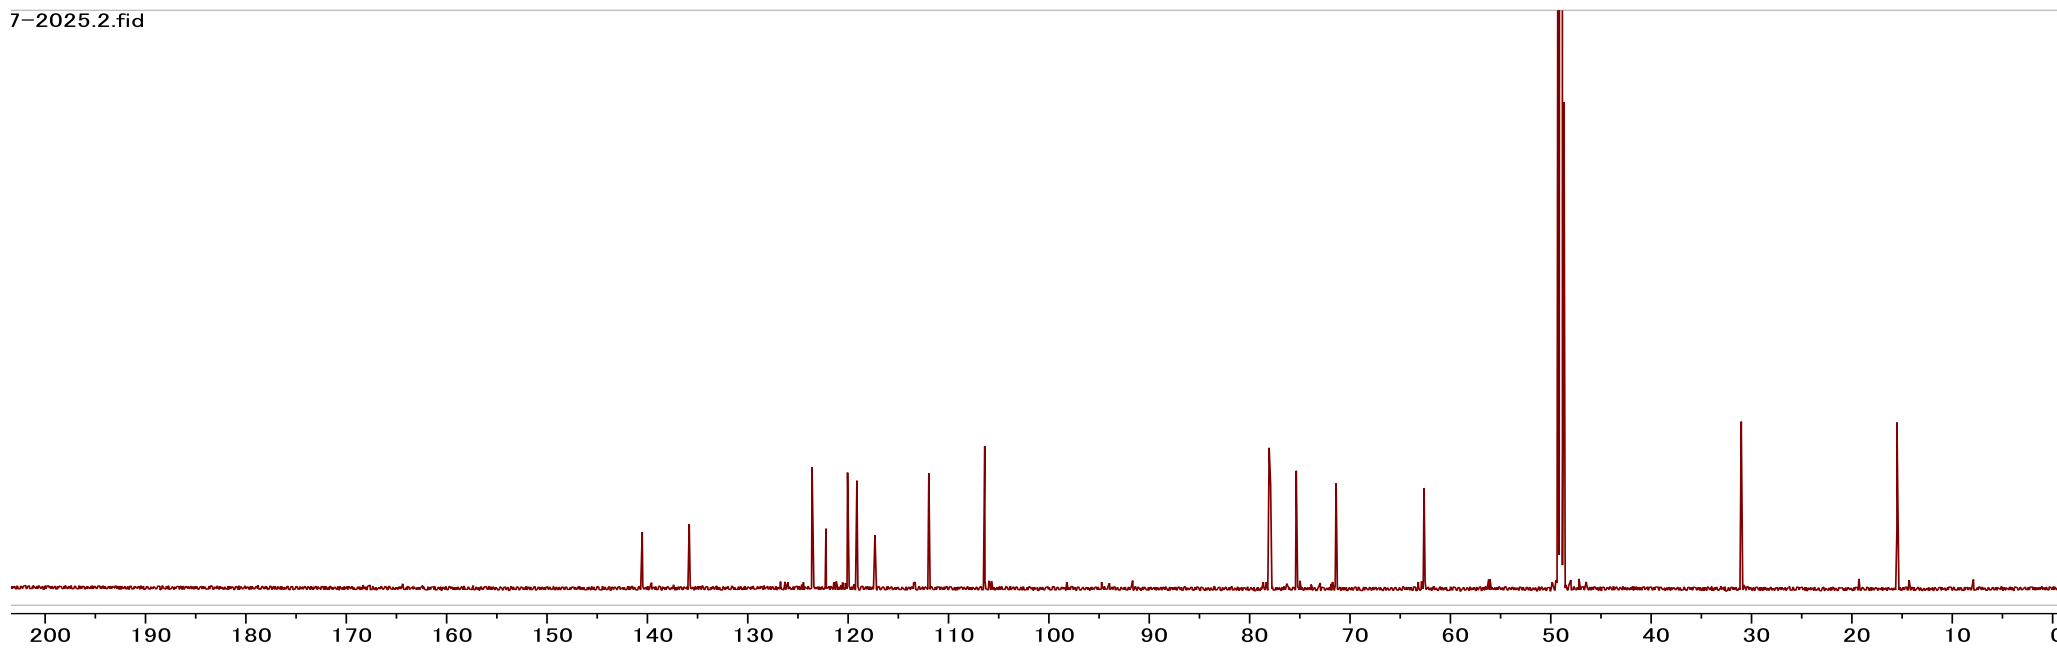

<sup>1</sup>H-NMR (800 MHz, CD<sub>3</sub>OD) of 3-(β-D-Glactopyranosyloxy)-1*H*-indol-2-yl 1-thio-β-D-glucopyranoside (**9b**).

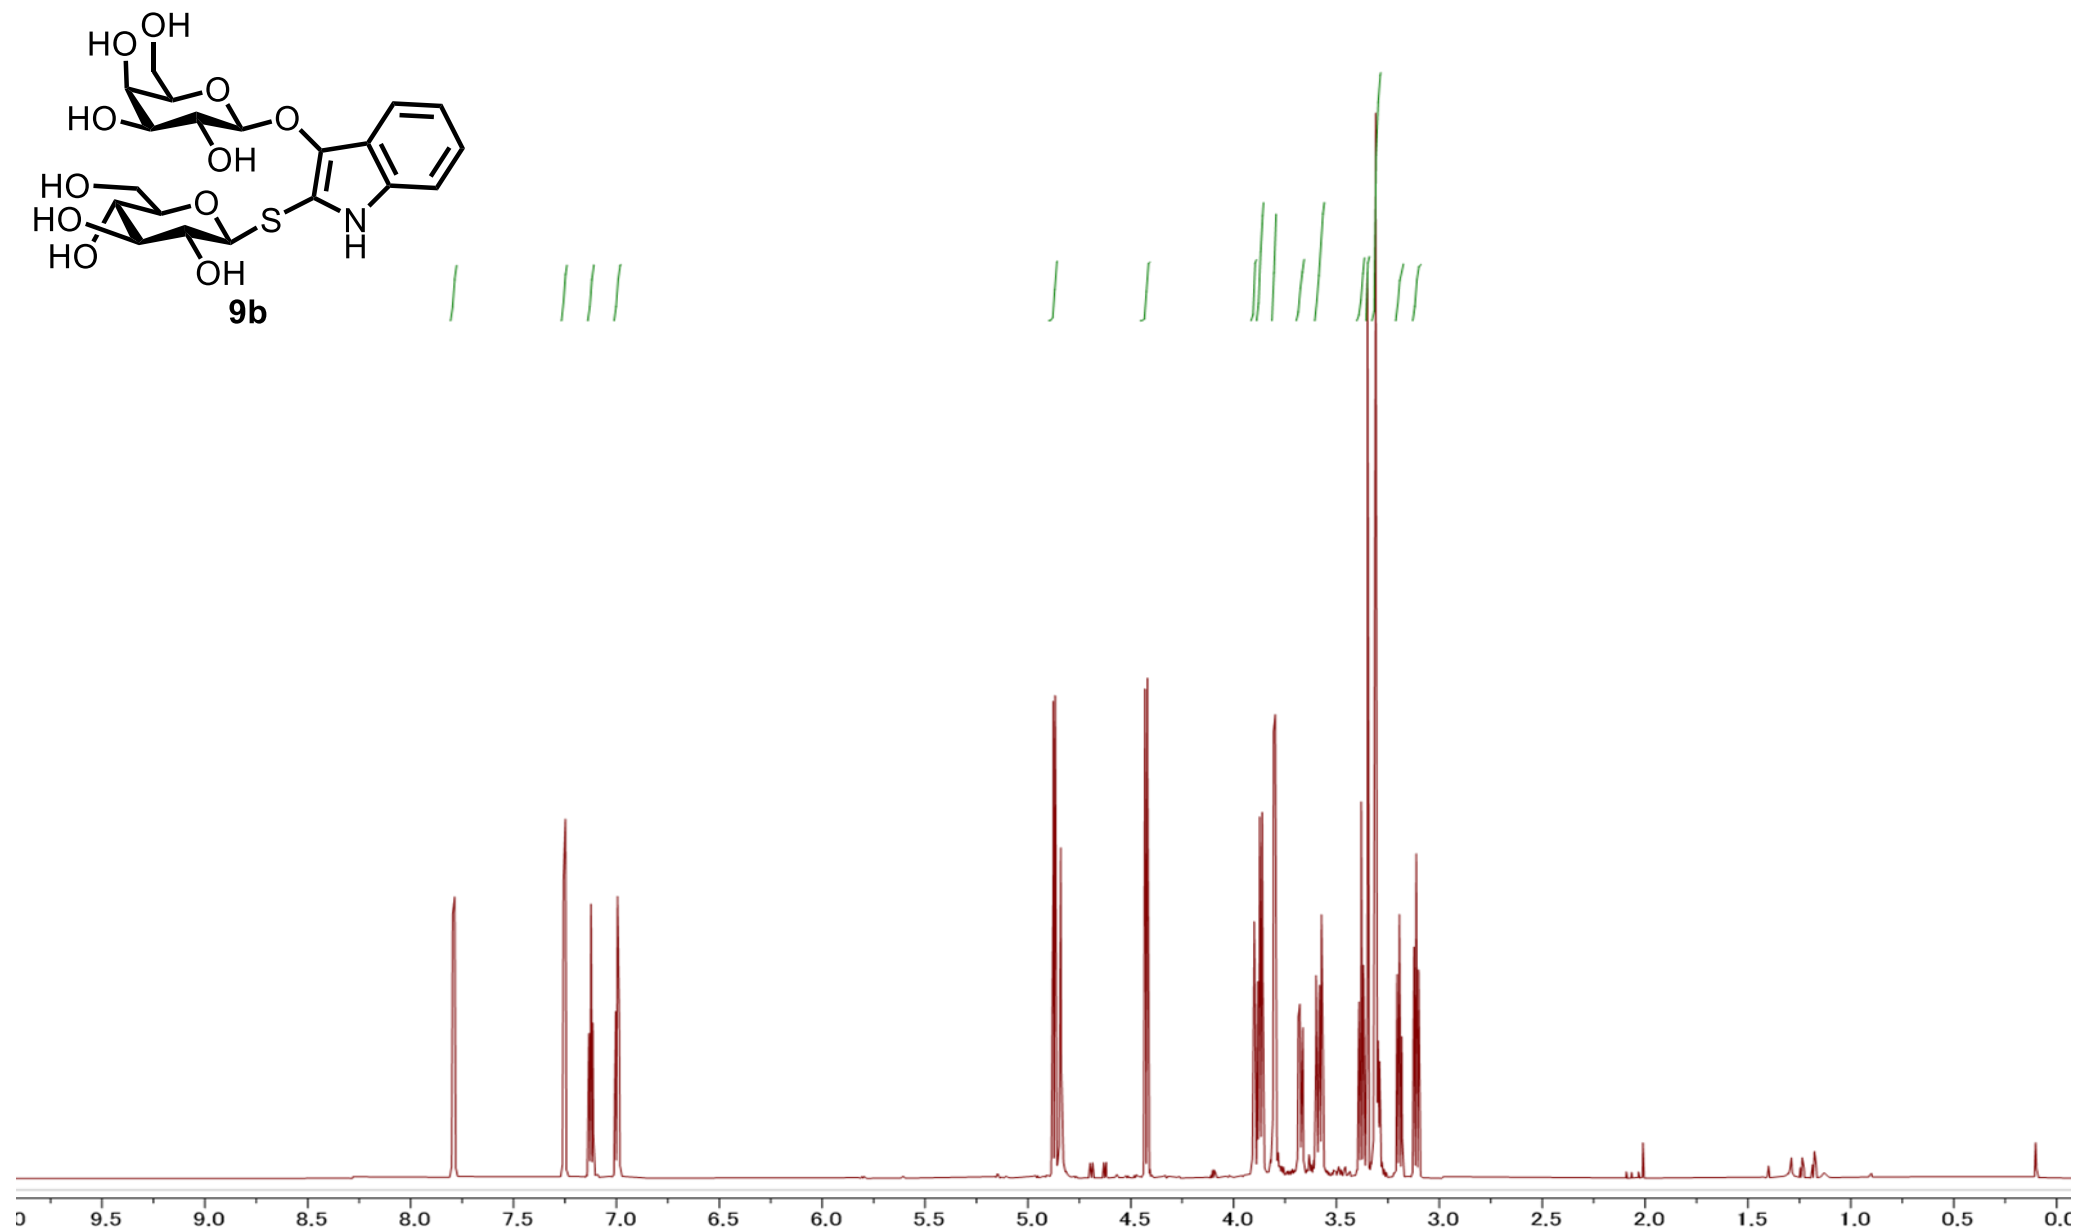

$^{13}\text{C}$ -NMR (200 MHz,  $\text{CD}_3\text{OD}$ ) of 3-( $\beta$ -D-Glactopyranosyloxy)-1*H*-indol-2-yl 1-thio- $\beta$ -D-glucopyranoside (**9b**).

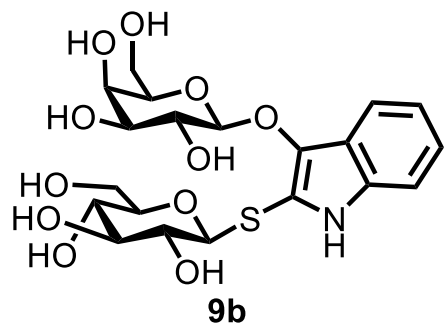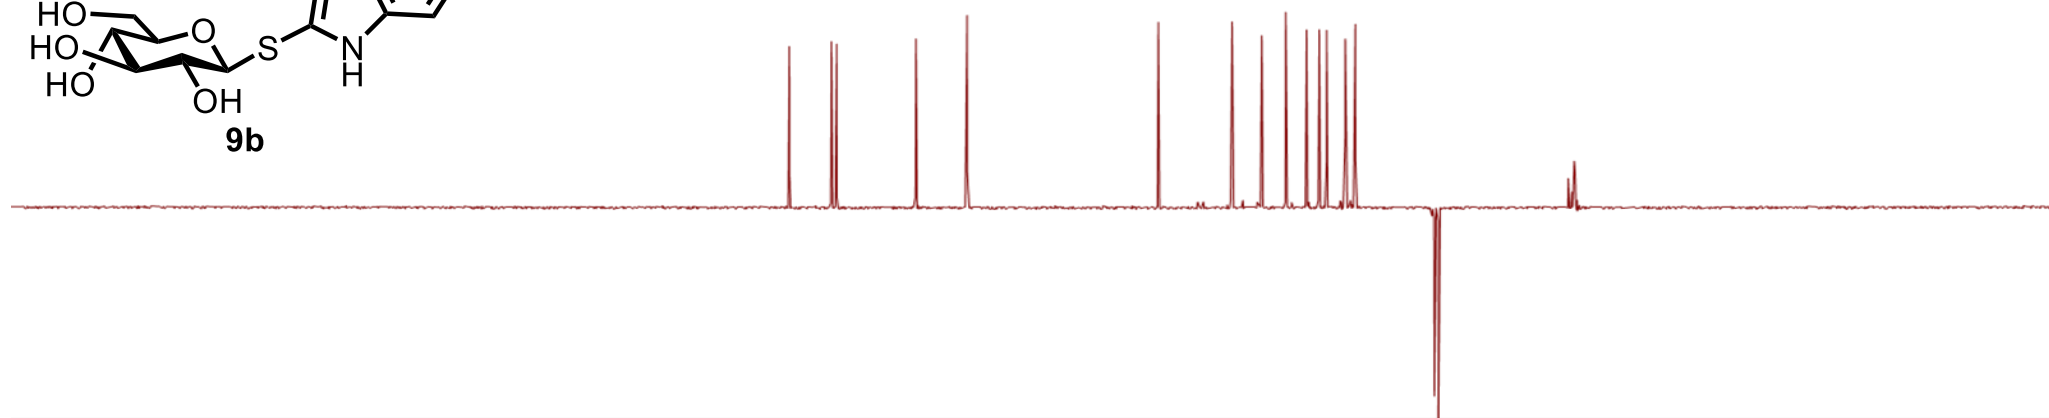

aliasGlu  
single pulse decoupled gated NOE

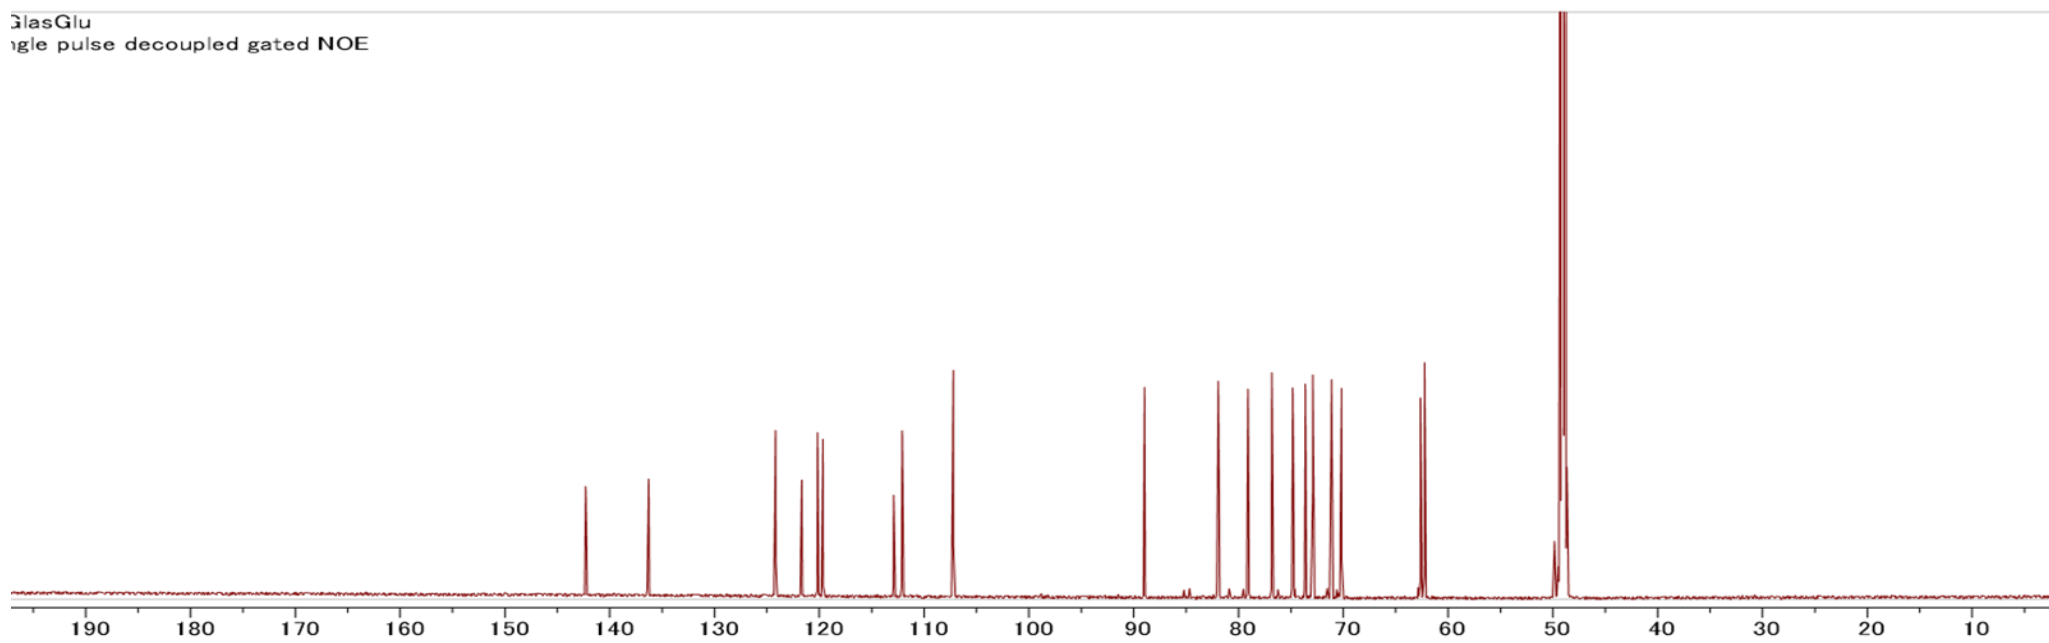

<sup>1</sup>H-NMR (800 MHz, CD<sub>3</sub>OD) of 3-(β-D-Xylopyranosyloxy)-1H-indol-2-yl 1-thio-β-D-gluco-*pyranoside* (9d).

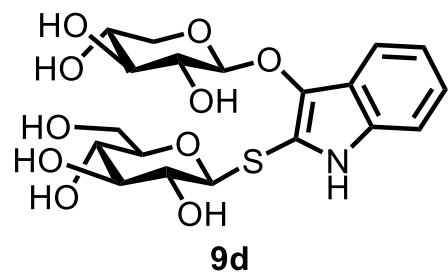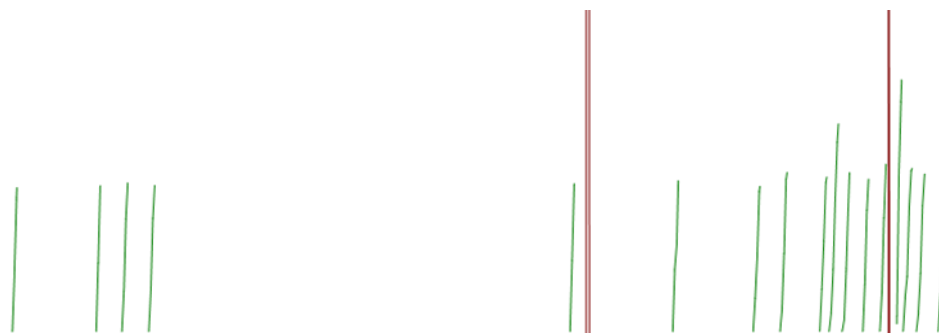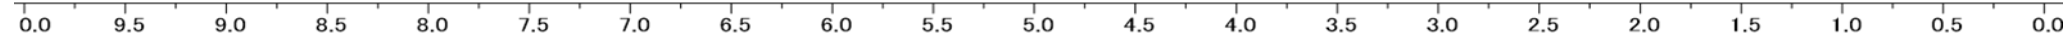

<sup>13</sup>C-NMR (200 MHz, CD<sub>3</sub>OD) of 3-(β-D-Xylopyranosyloxy)-1H-indol-2-yl 1-thio-β-D-glucopyranoside (9d).

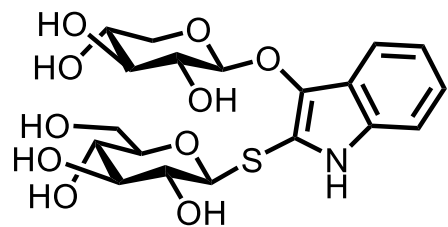

9d

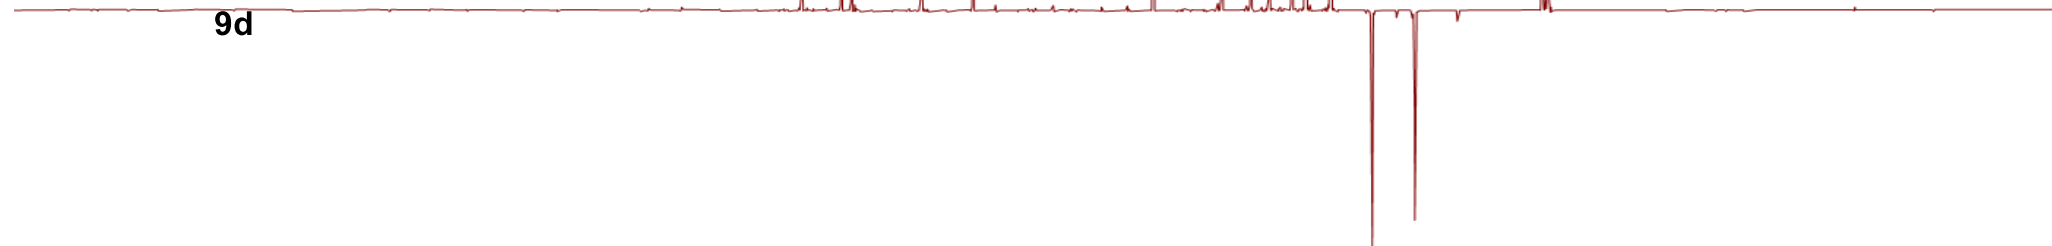

γ|S|Glu  
ngle pulse decoupled gated NOE

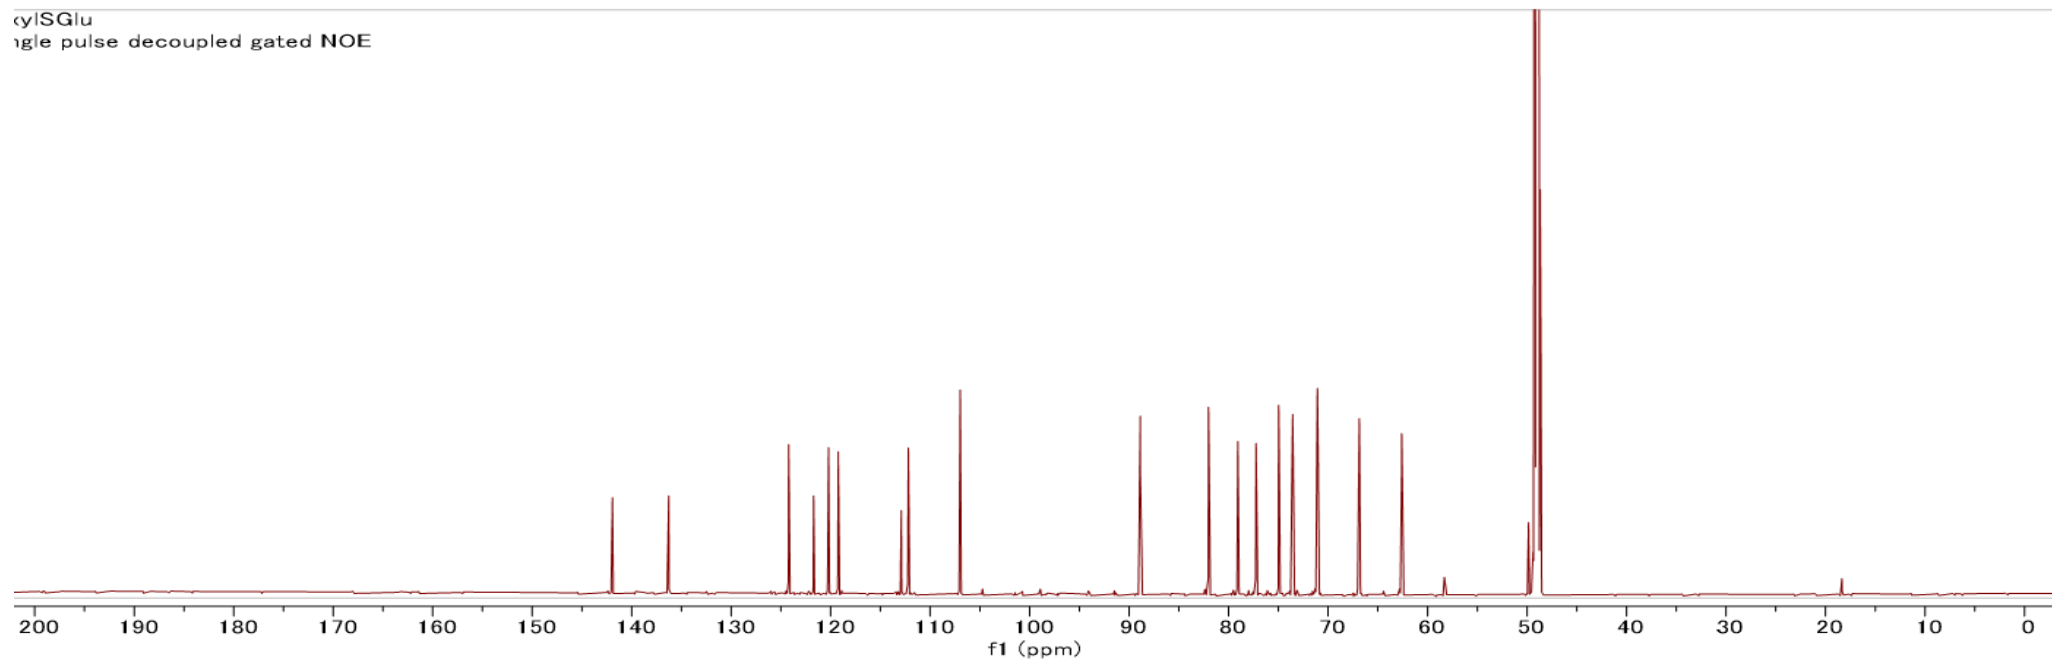

<sup>1</sup>H-NMR (800 MHz, D<sub>2</sub>O) of 3-(β-D-Arabinopyranosyloxy)-1*H*-indol-2-yl 1-thio-β-D-glucopyranoside (9e).

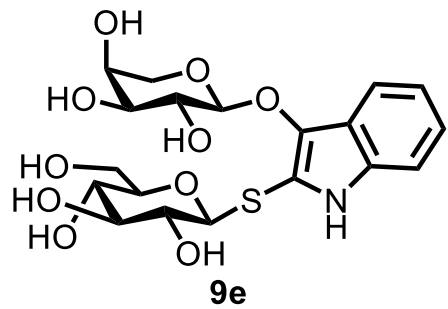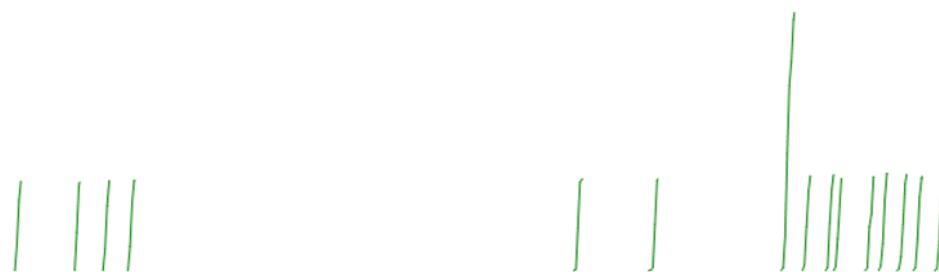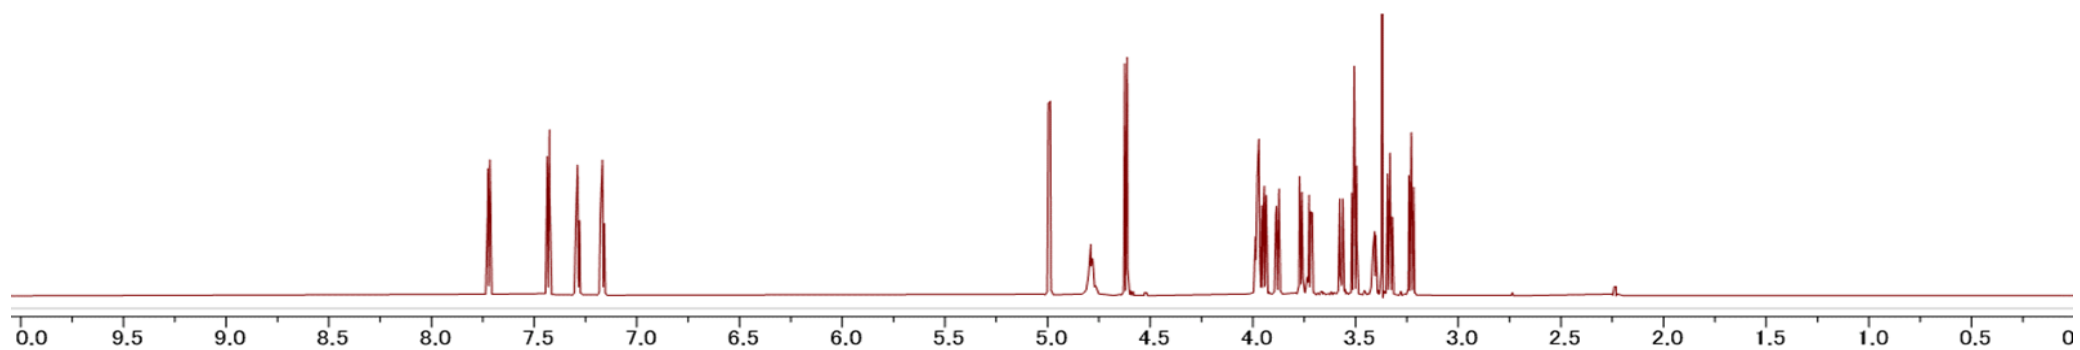

<sup>13</sup>C-NMR (200 MHz, D<sub>2</sub>O) of 3-(β-D-Arabinopyranosyloxy)-1H-indol-2-yl 1-thio-β-D-gluco-*pyranoside* (**9e**).

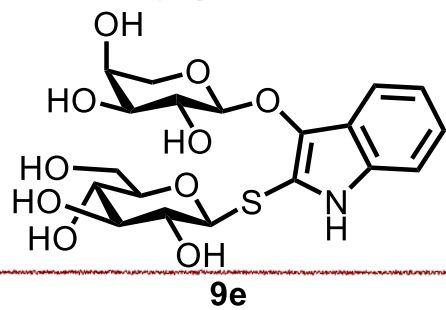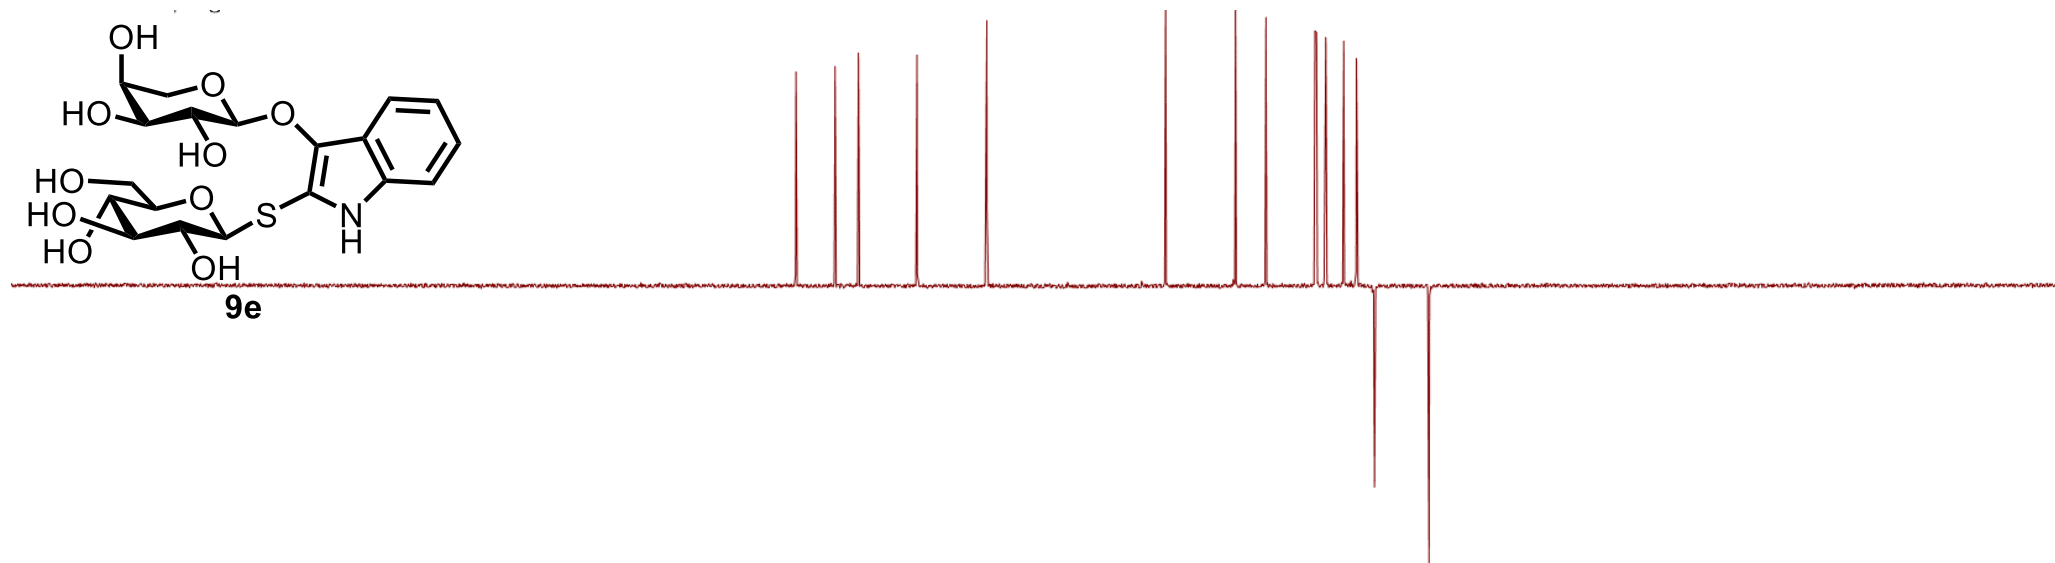

ArabSGlu  
1g pulse decoupled gated NOE

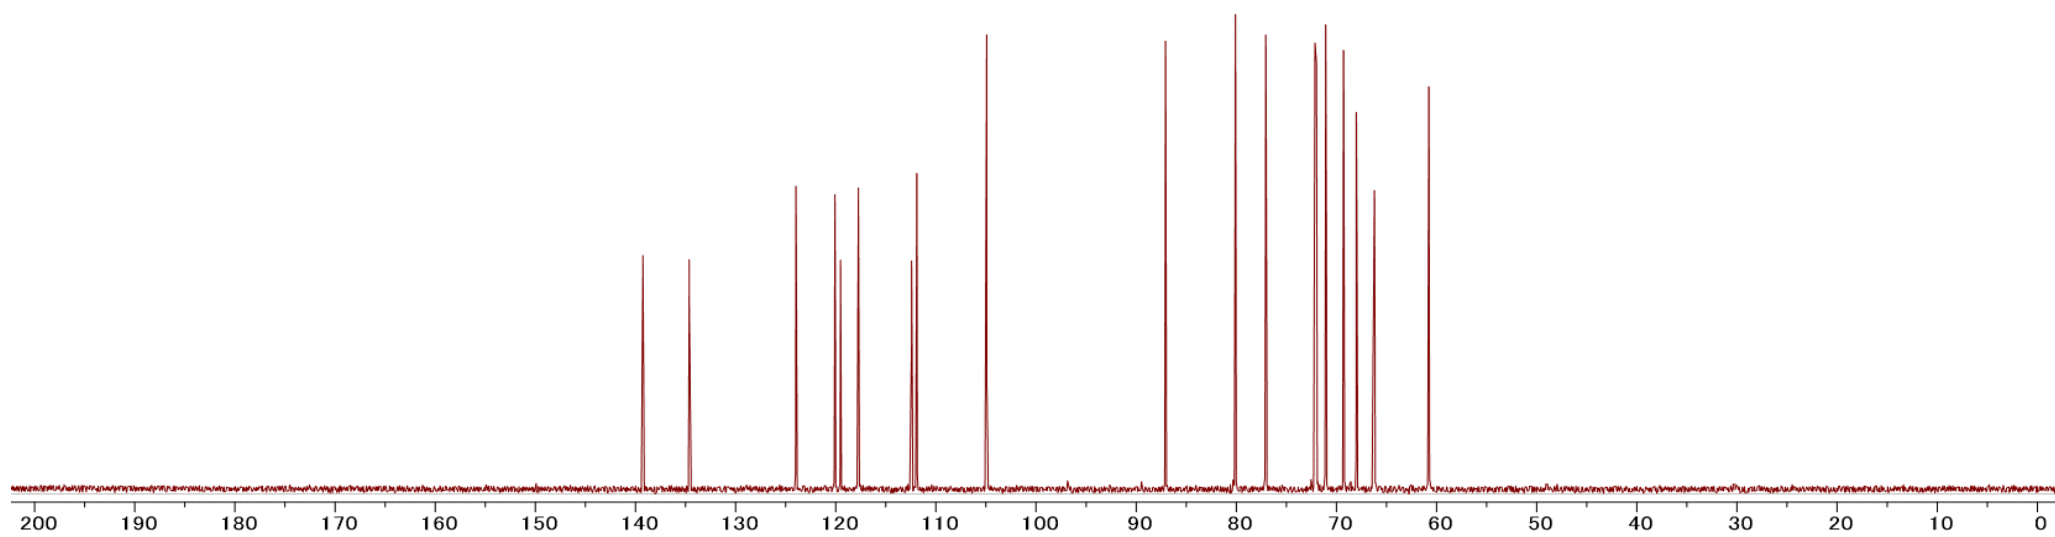

<sup>1</sup>H-NMR (800 MHz, D<sub>2</sub>O) of 3-(β-D-Maltopyranosyloxy)-1*H*-indol-2-yl 1-thio-β-D-glucopyranoside (9f).

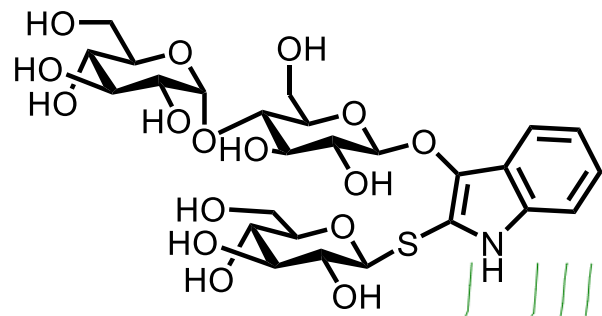

9f

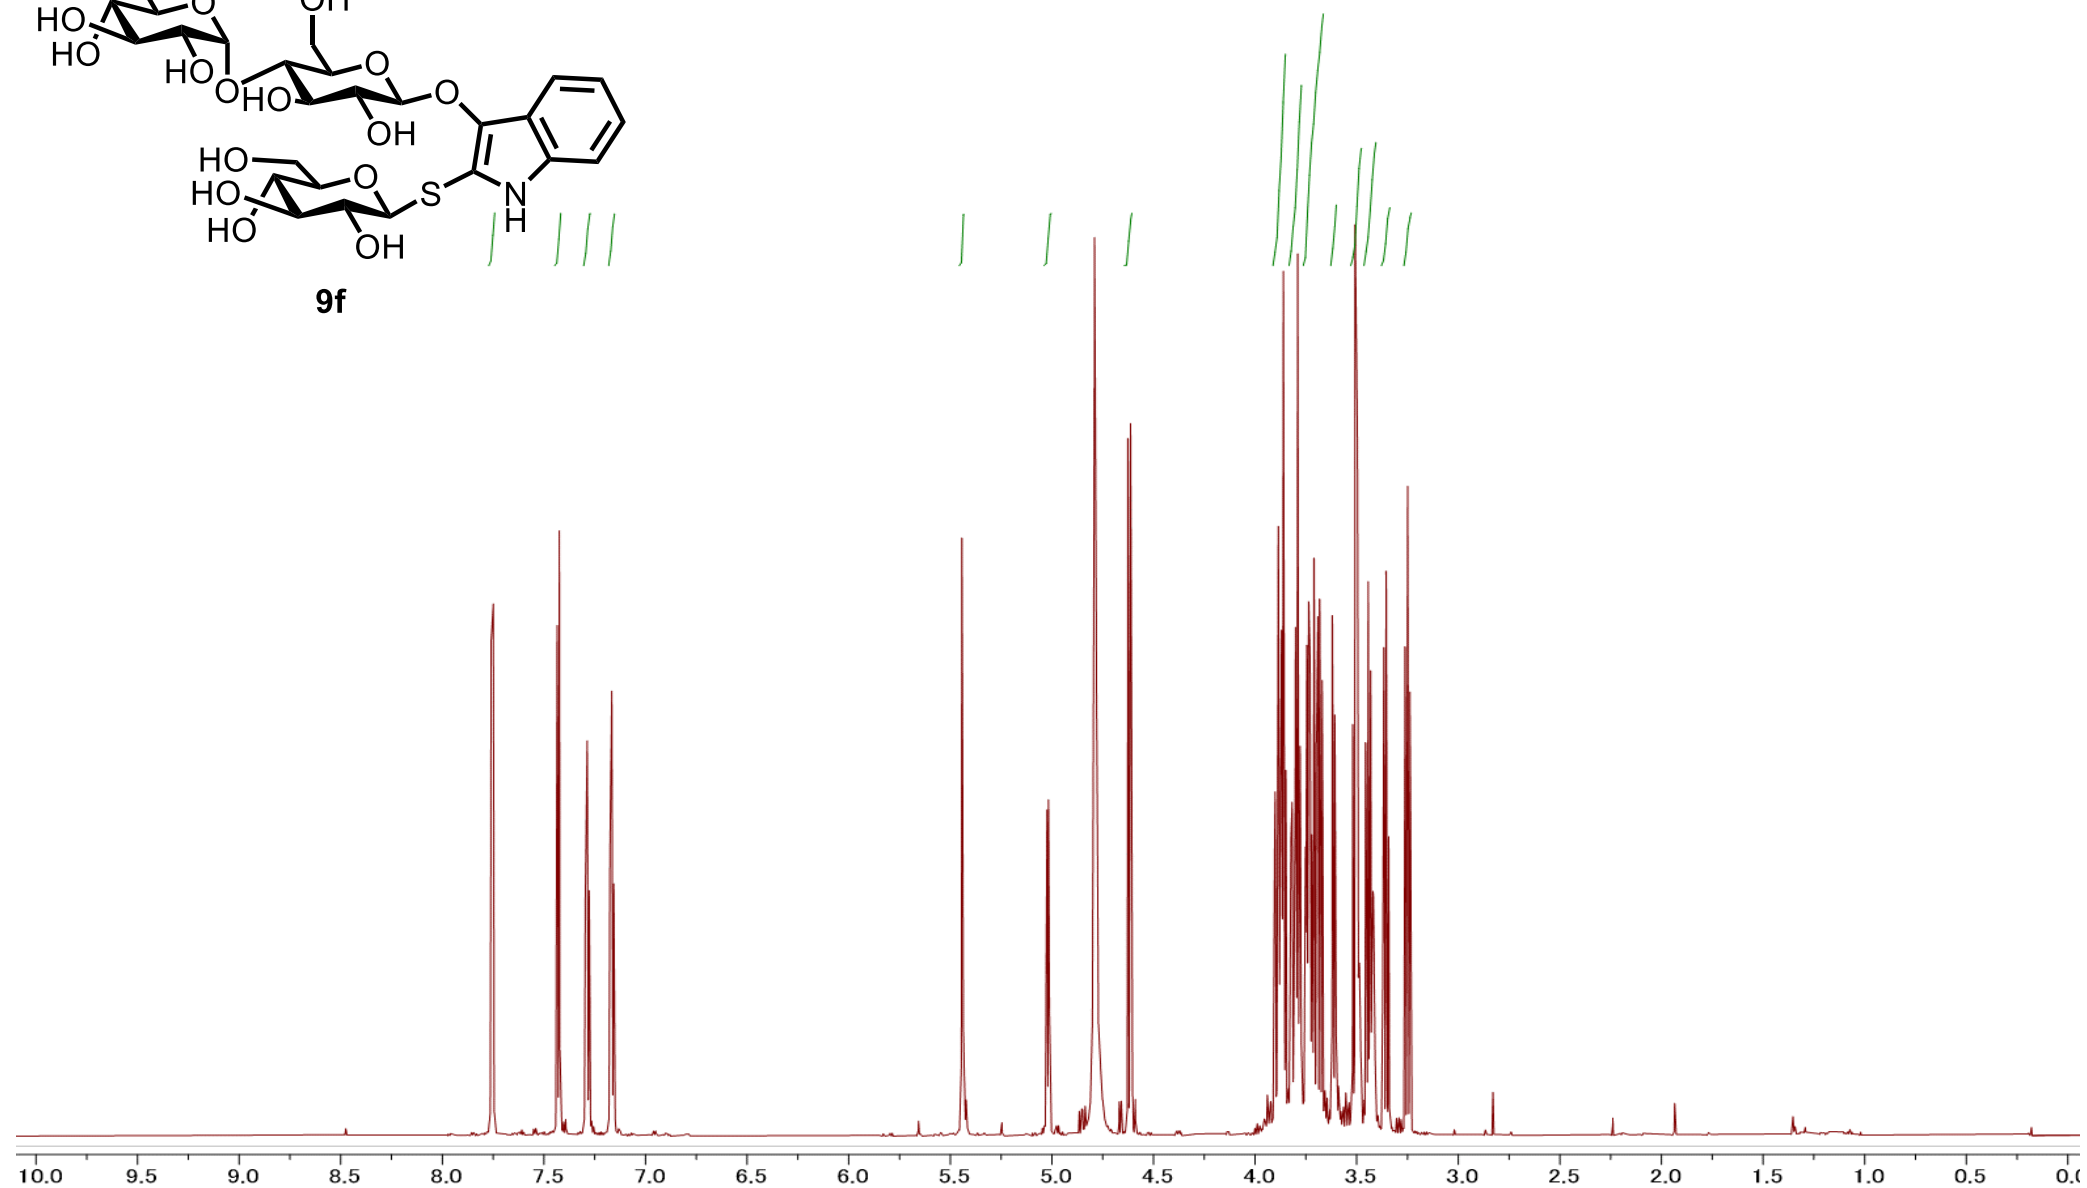

<sup>13</sup>C-NMR (200 MHz, D<sub>2</sub>O) of 3-(β-D-Maltopyranosyloxy)-1*H*-indol-2-yl 1-thio-β-D-glucopyranoside (9f).

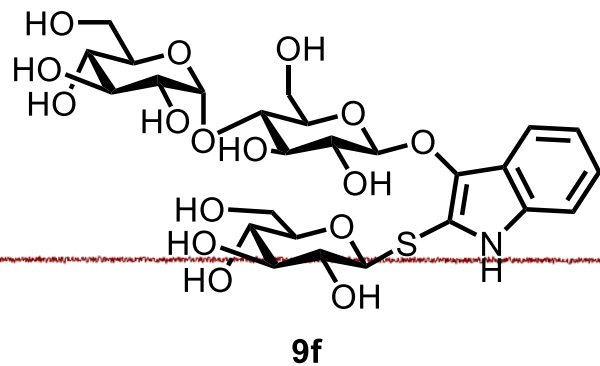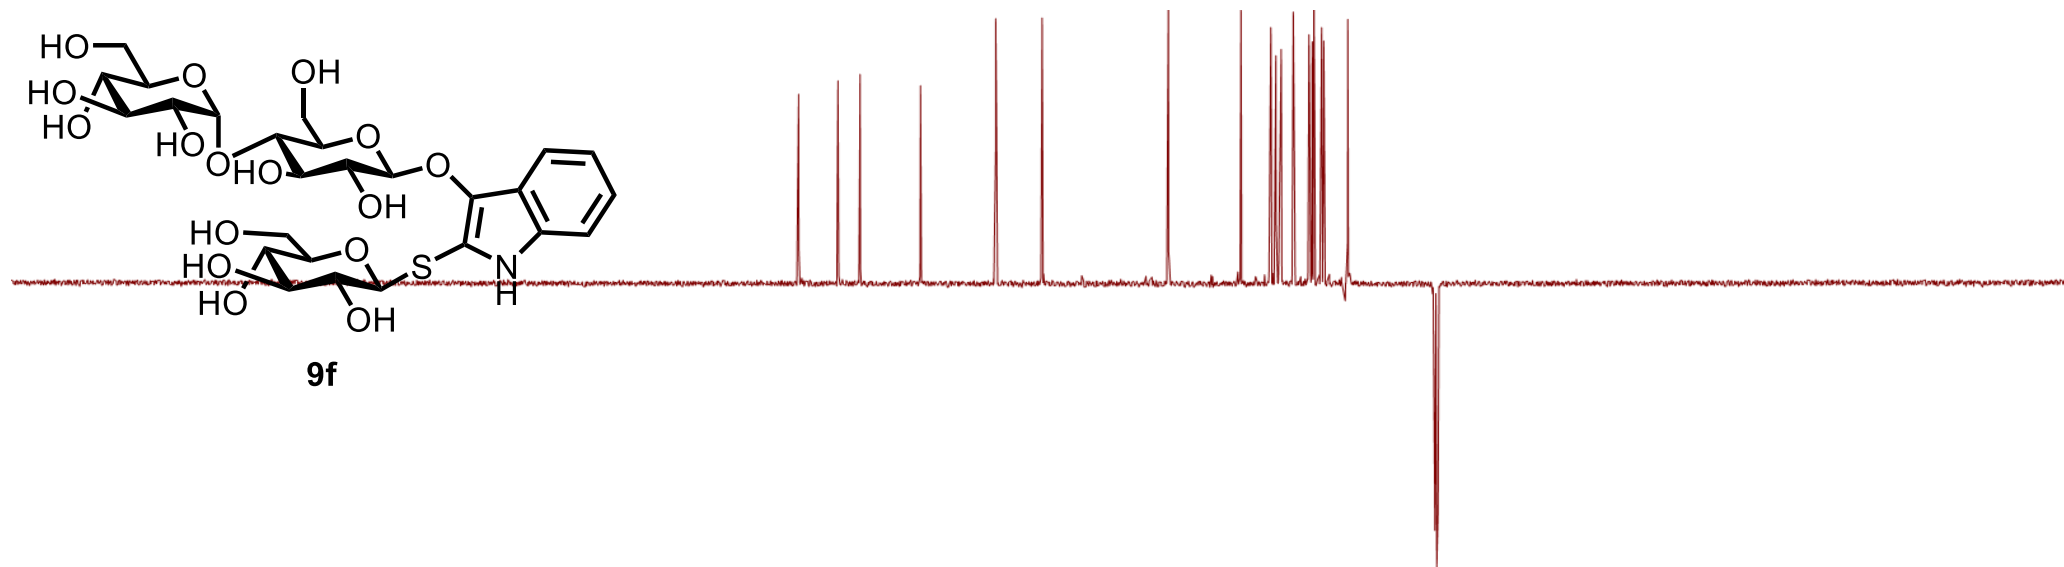

Glu  
pulse decoupled gated NOE

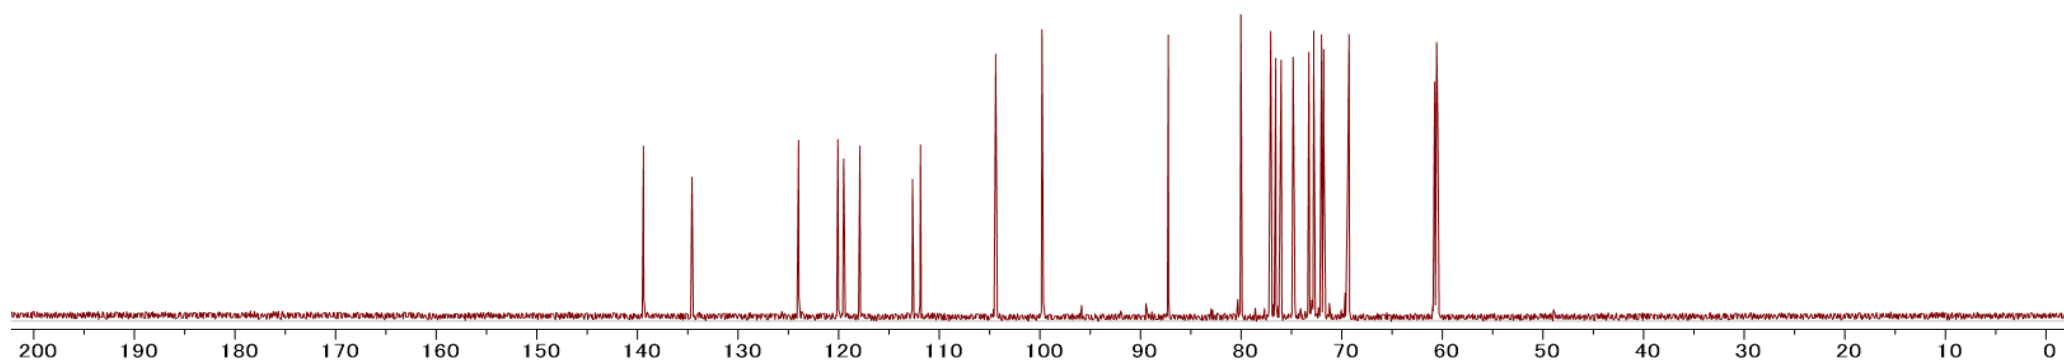

<sup>1</sup>H-NMR (800 MHz, CDCl<sub>3</sub>) of 3-(2,3,4,6-tetra-*O*-acetyl-β-D-glucopyranosyloxy)-1*H*-indol-2-yl 2,3,4,6-tetra-*O*-acetyl-1-thio-β-D-glucopyranoside (10a).

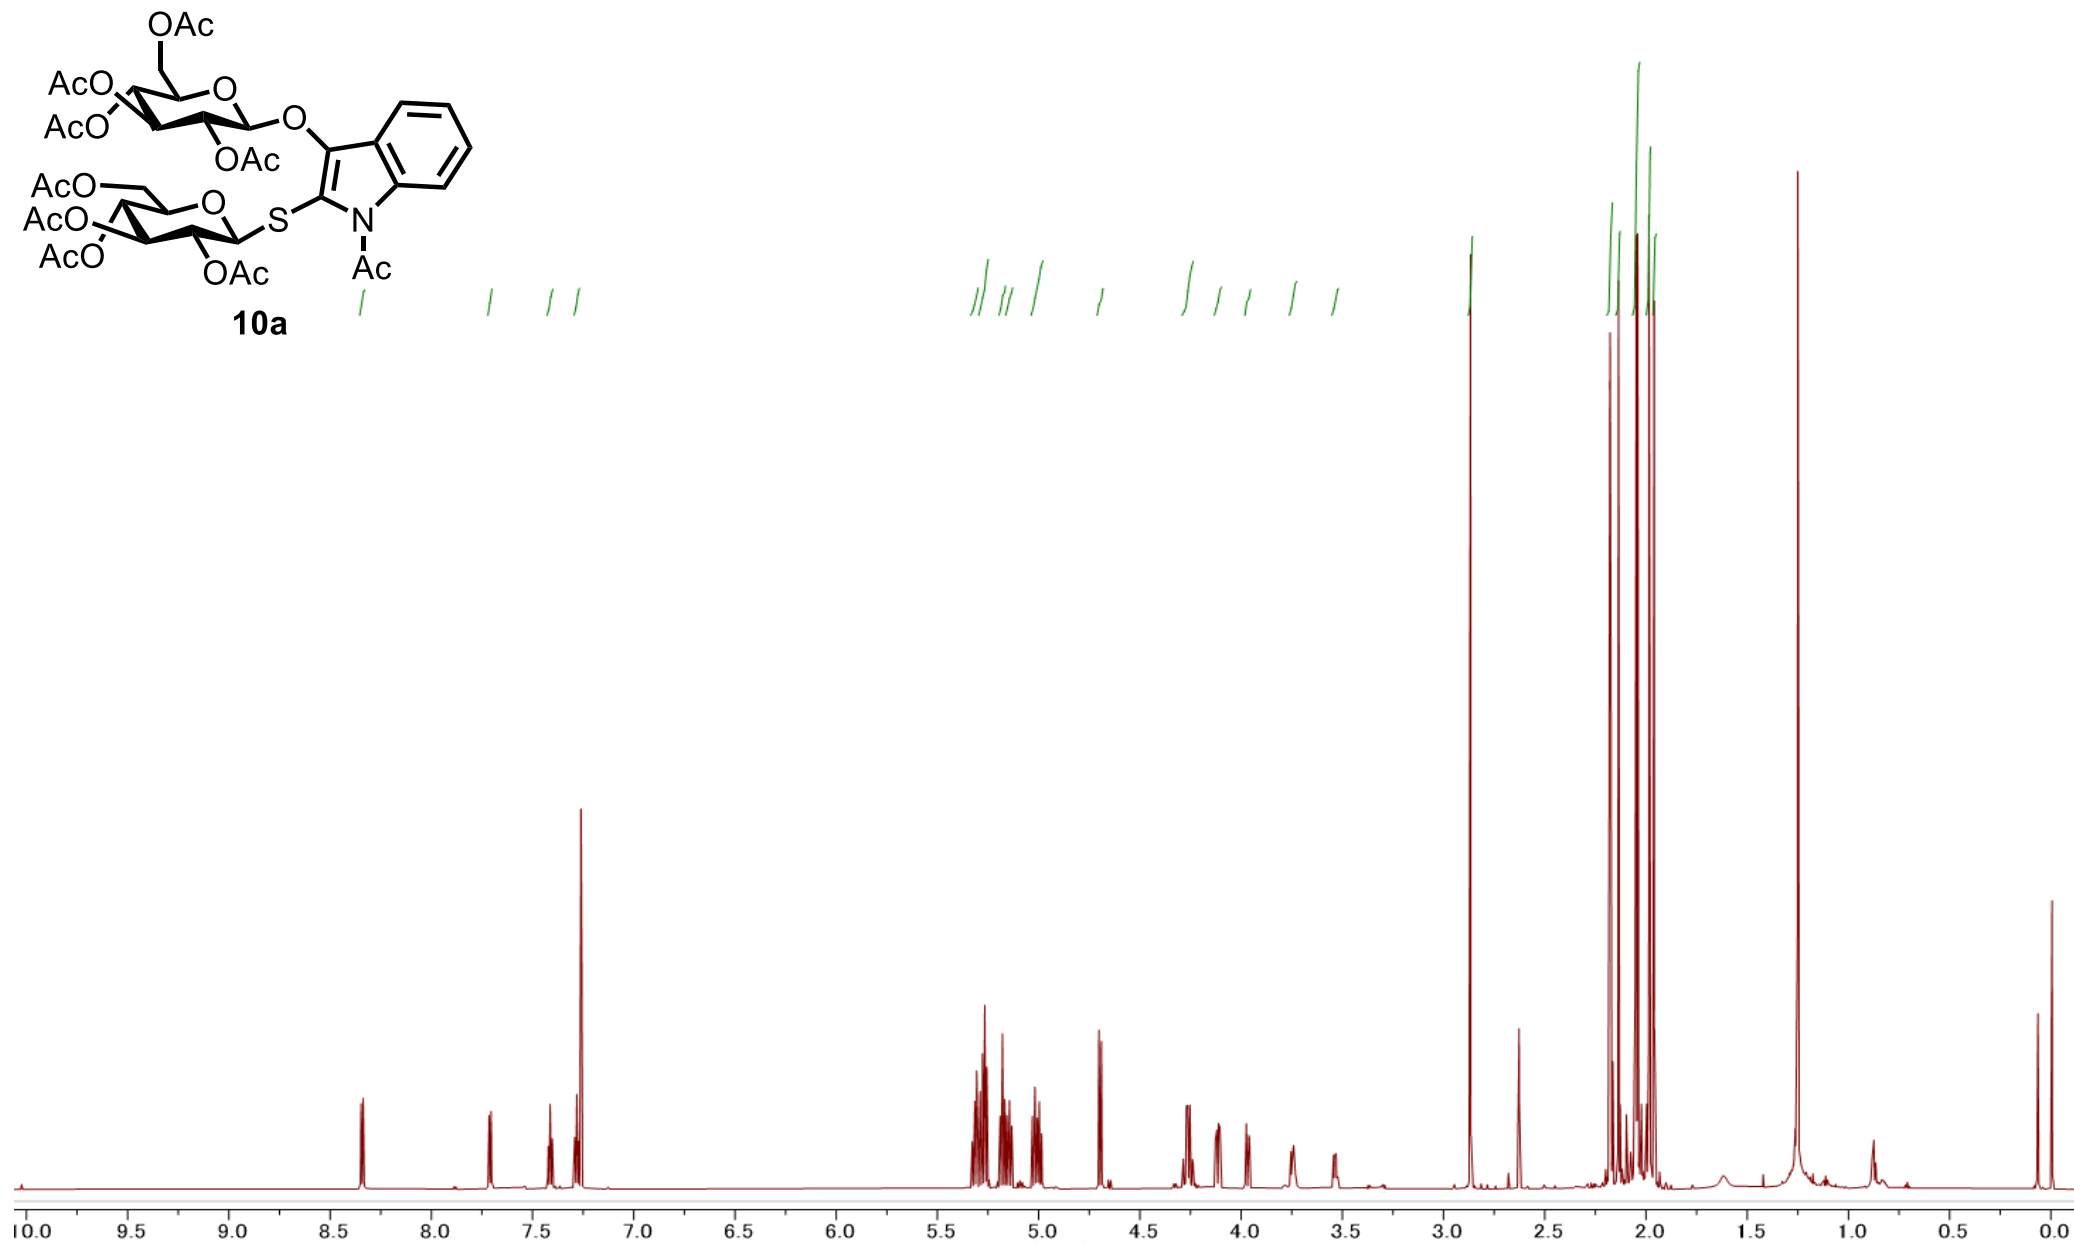

$^{13}\text{C}$ -NMR (200 MHz,  $\text{CDCl}_3$ ) of 3-(2,3,4,6-tetra-*O*-acetyl- $\beta$ -D-glucopyranosyloxy)-1*H*-indol-2-yl 2,3,4,6-tetra-*O*-acetyl-1-thio- $\beta$ -D-glucopyranoside (10a).

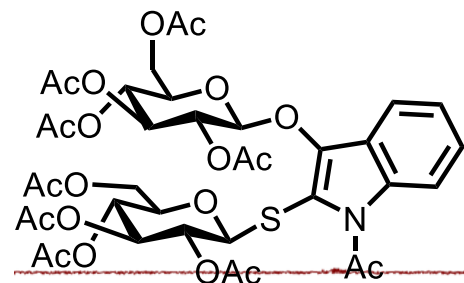

10a

oct16-2025.2.fid

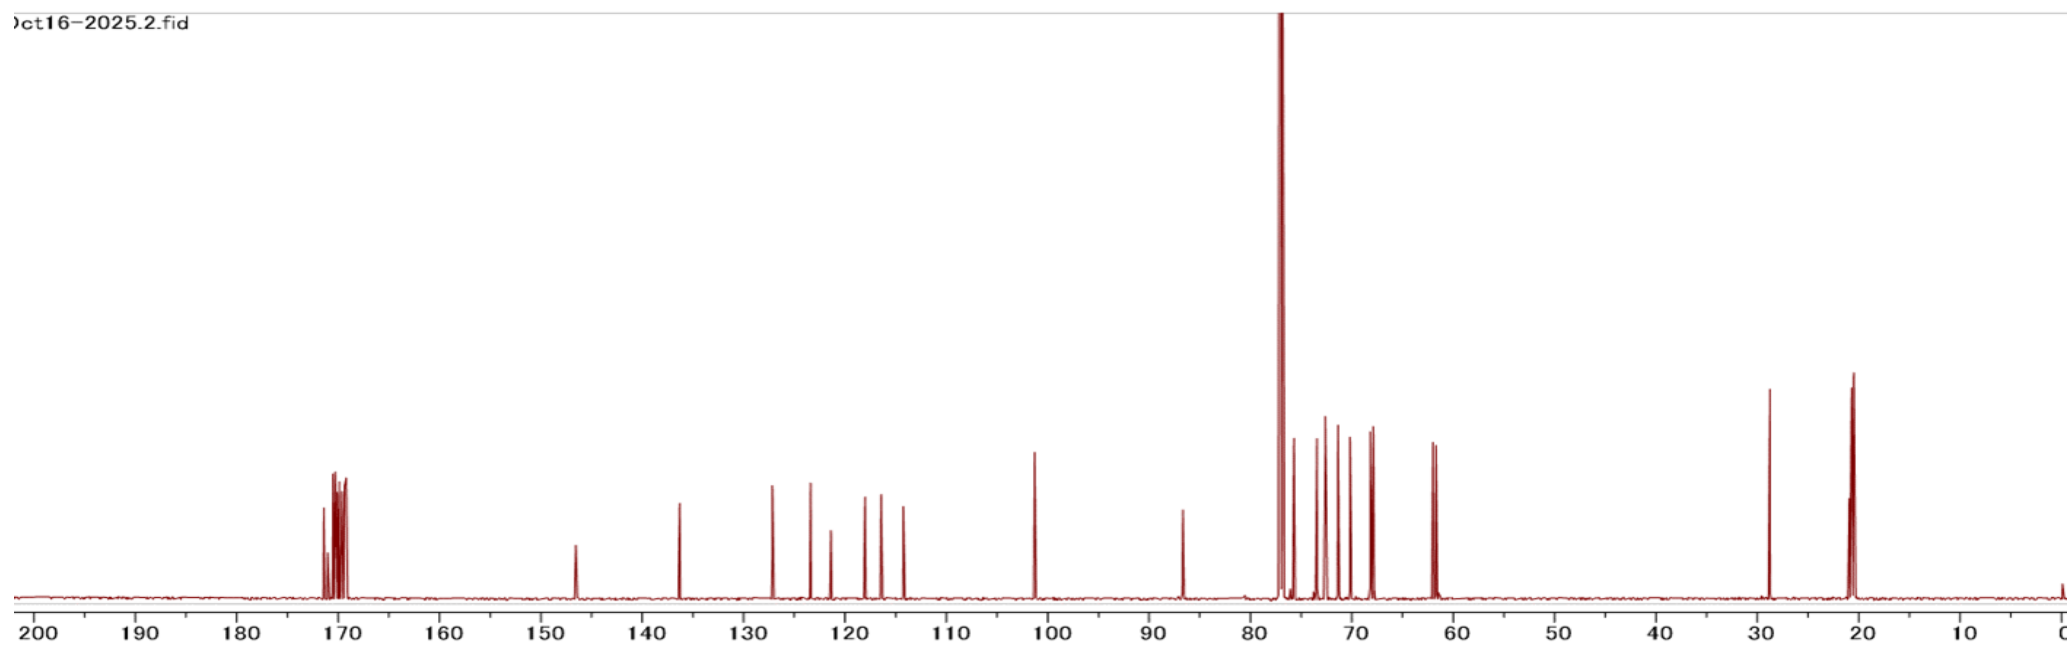

<sup>1</sup>H-NMR (800 MHz, CDCl<sub>3</sub>) of 3-(2,3,4,6-Tetra-*O*-propionyl-β-D-glucopyranosyloxy)-1*H*-5-indol-2-yl 2,3,4,6-tetra-*O*-propionyl-1-thio-β-D-glucopyranoside (10b).

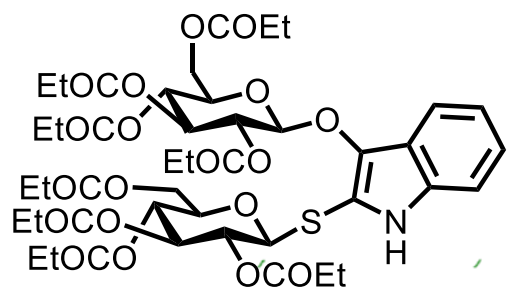

**10b**

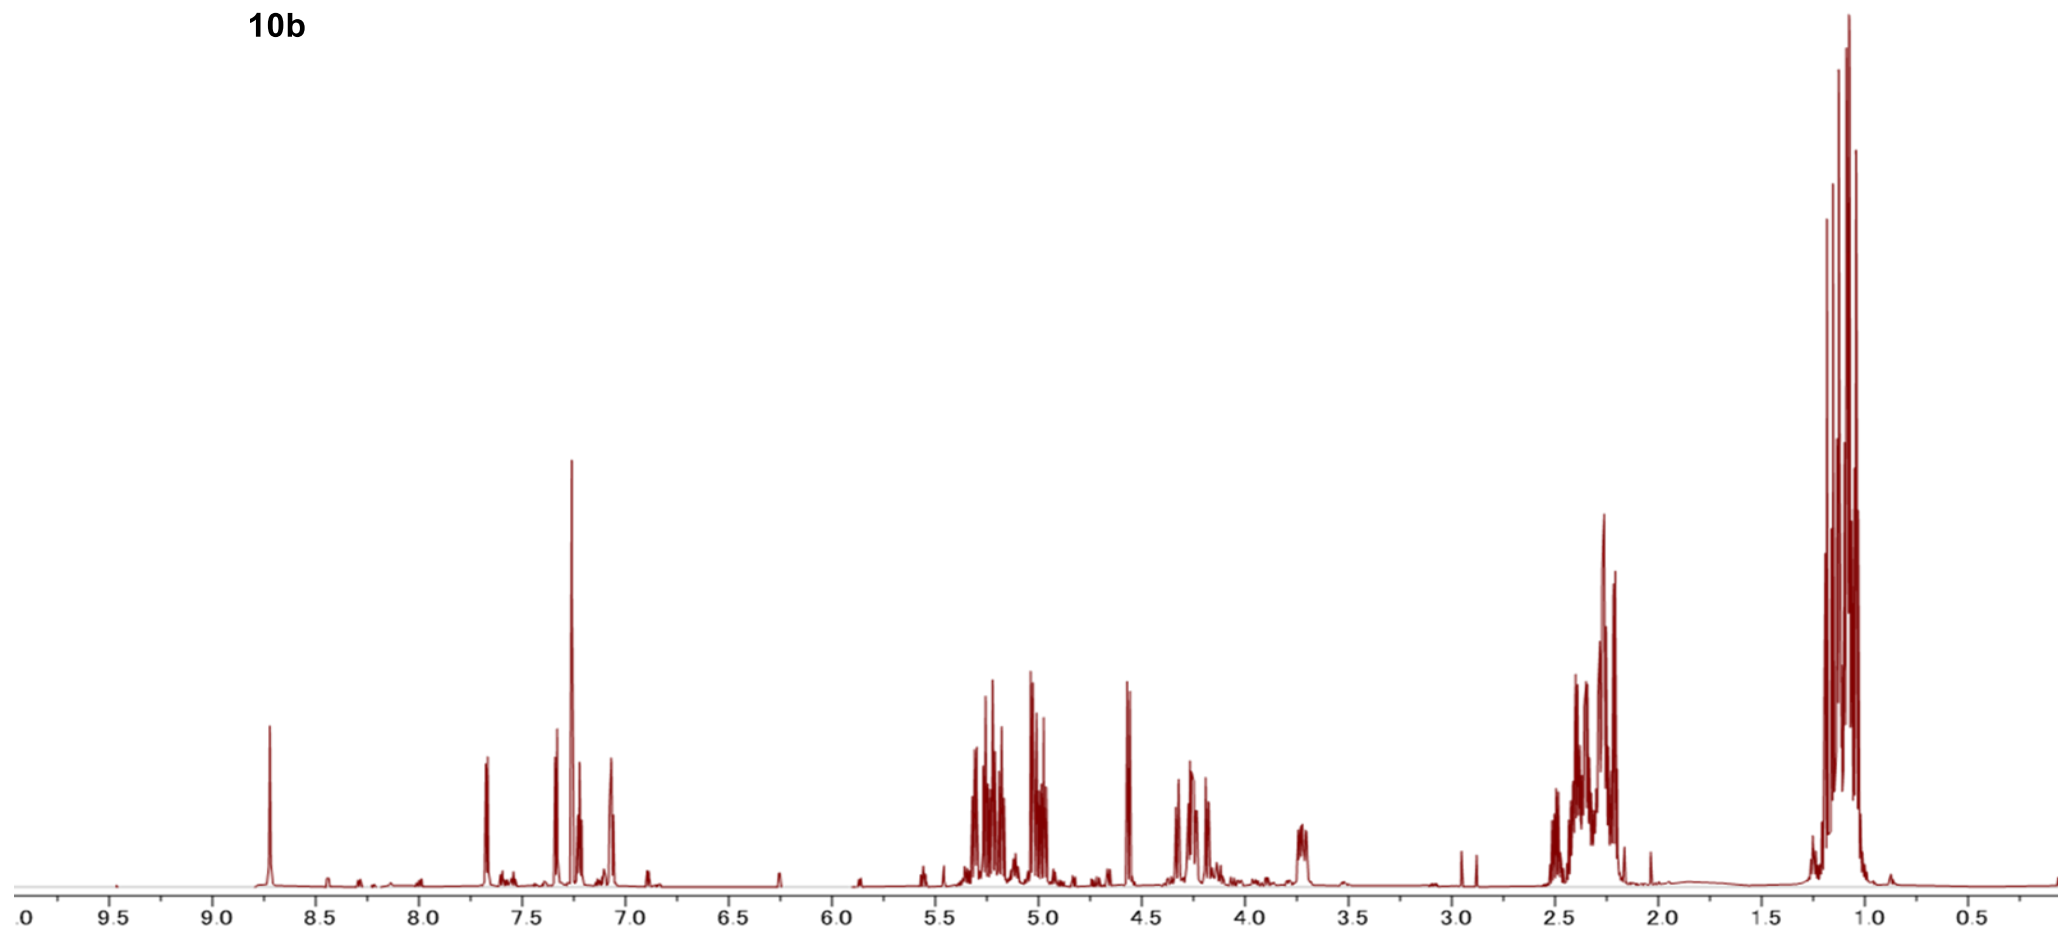

$^{13}\text{C}$ -NMR (200 MHz,  $\text{CDCl}_3$ ) of 3-(2,3,4,6-Tetra-*O*-propionyl- $\beta$ -D-glucopyranosyloxy)-1*H*-5-indol-2-yl 2,3,4,6-tetra-*O*-propionyl-1-thio- $\beta$ -D-glucopyranoside (10b).

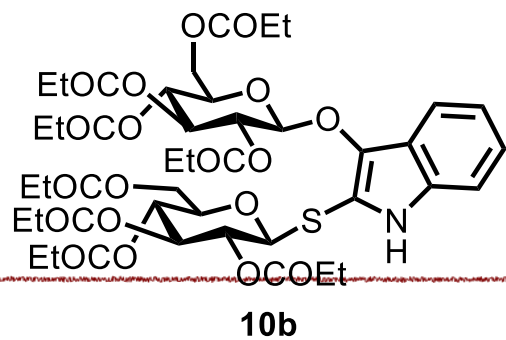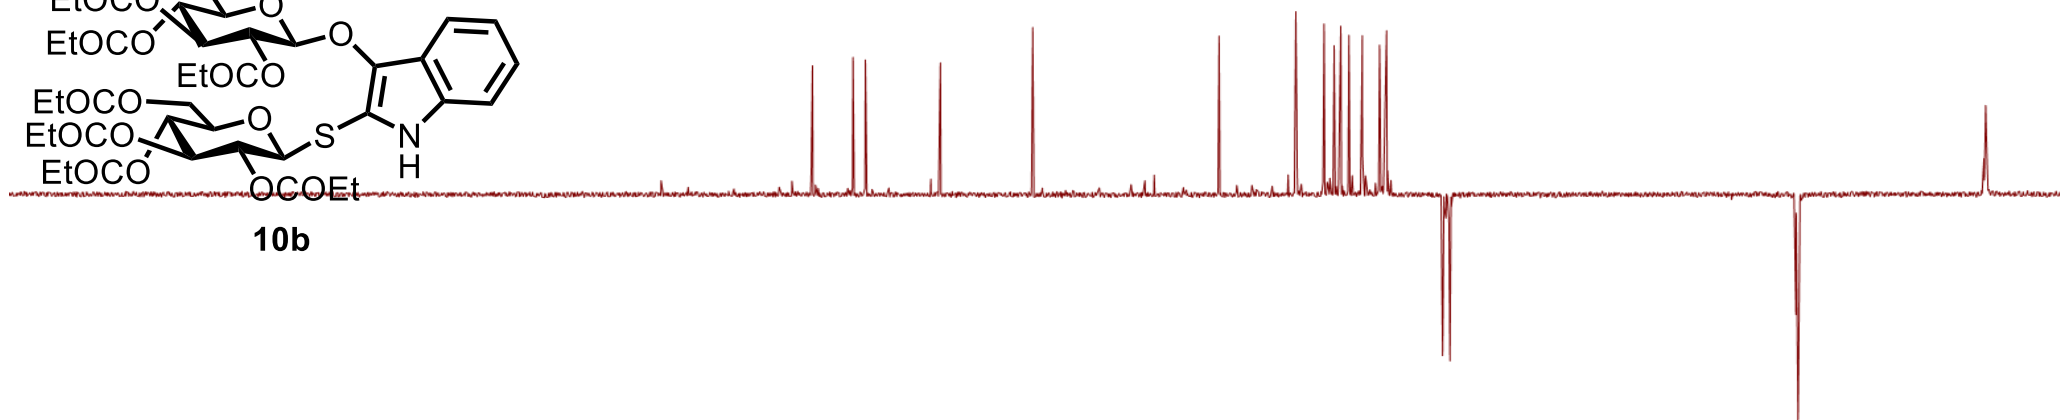

ProGluOProGlu  
angle pulse decoupled gated NOE

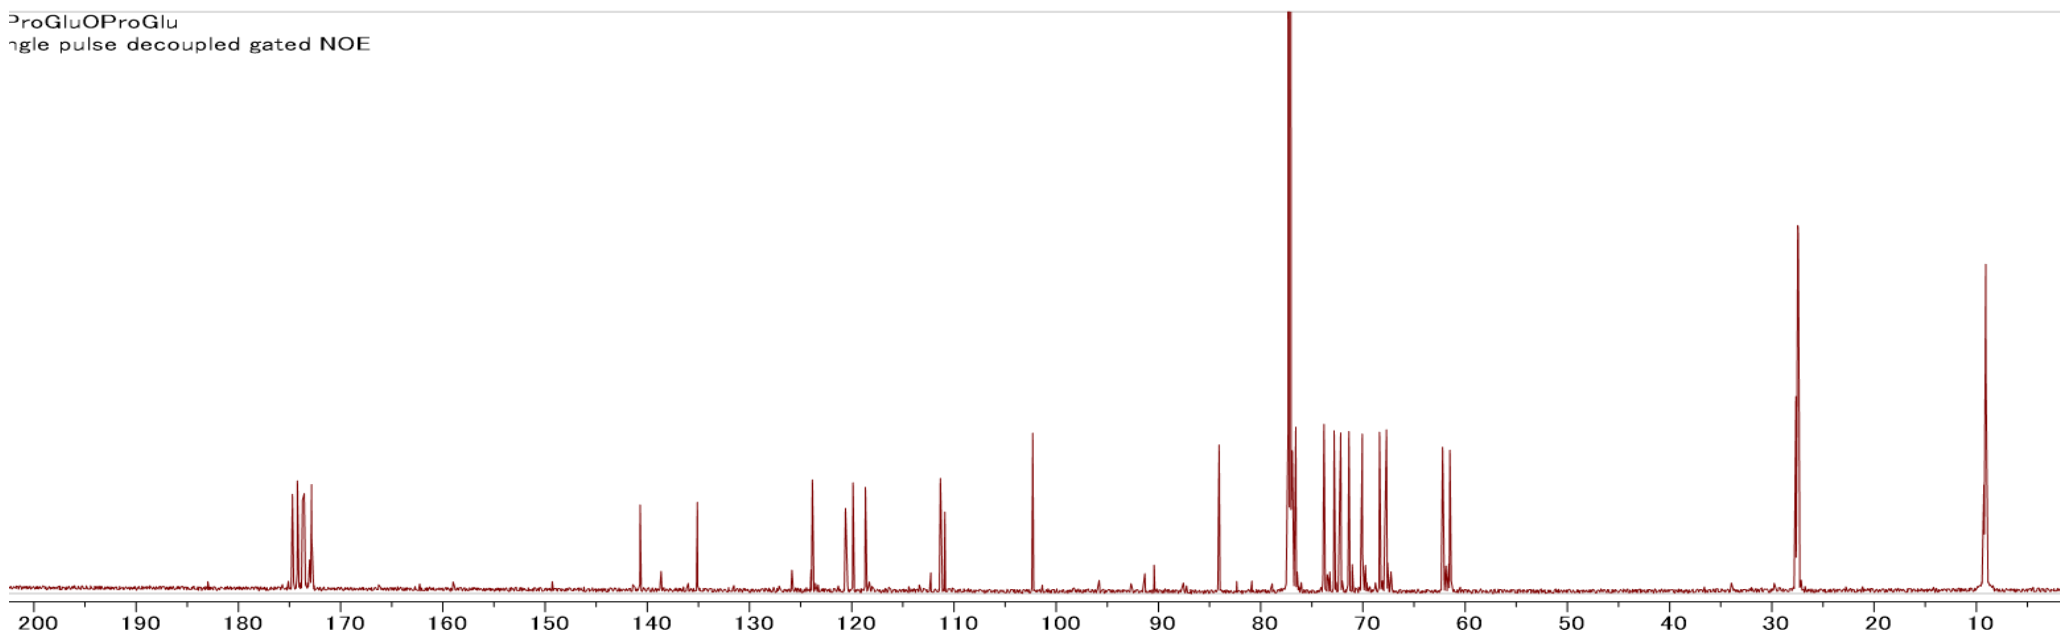

<sup>1</sup>H-NMR (800 MHz, CDCl<sub>3</sub>) of 2-Acetyloxy-2,3-dihydro-1-benzofuran-3-one (16a).

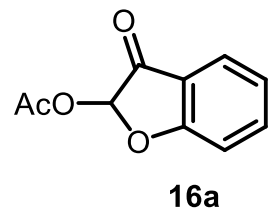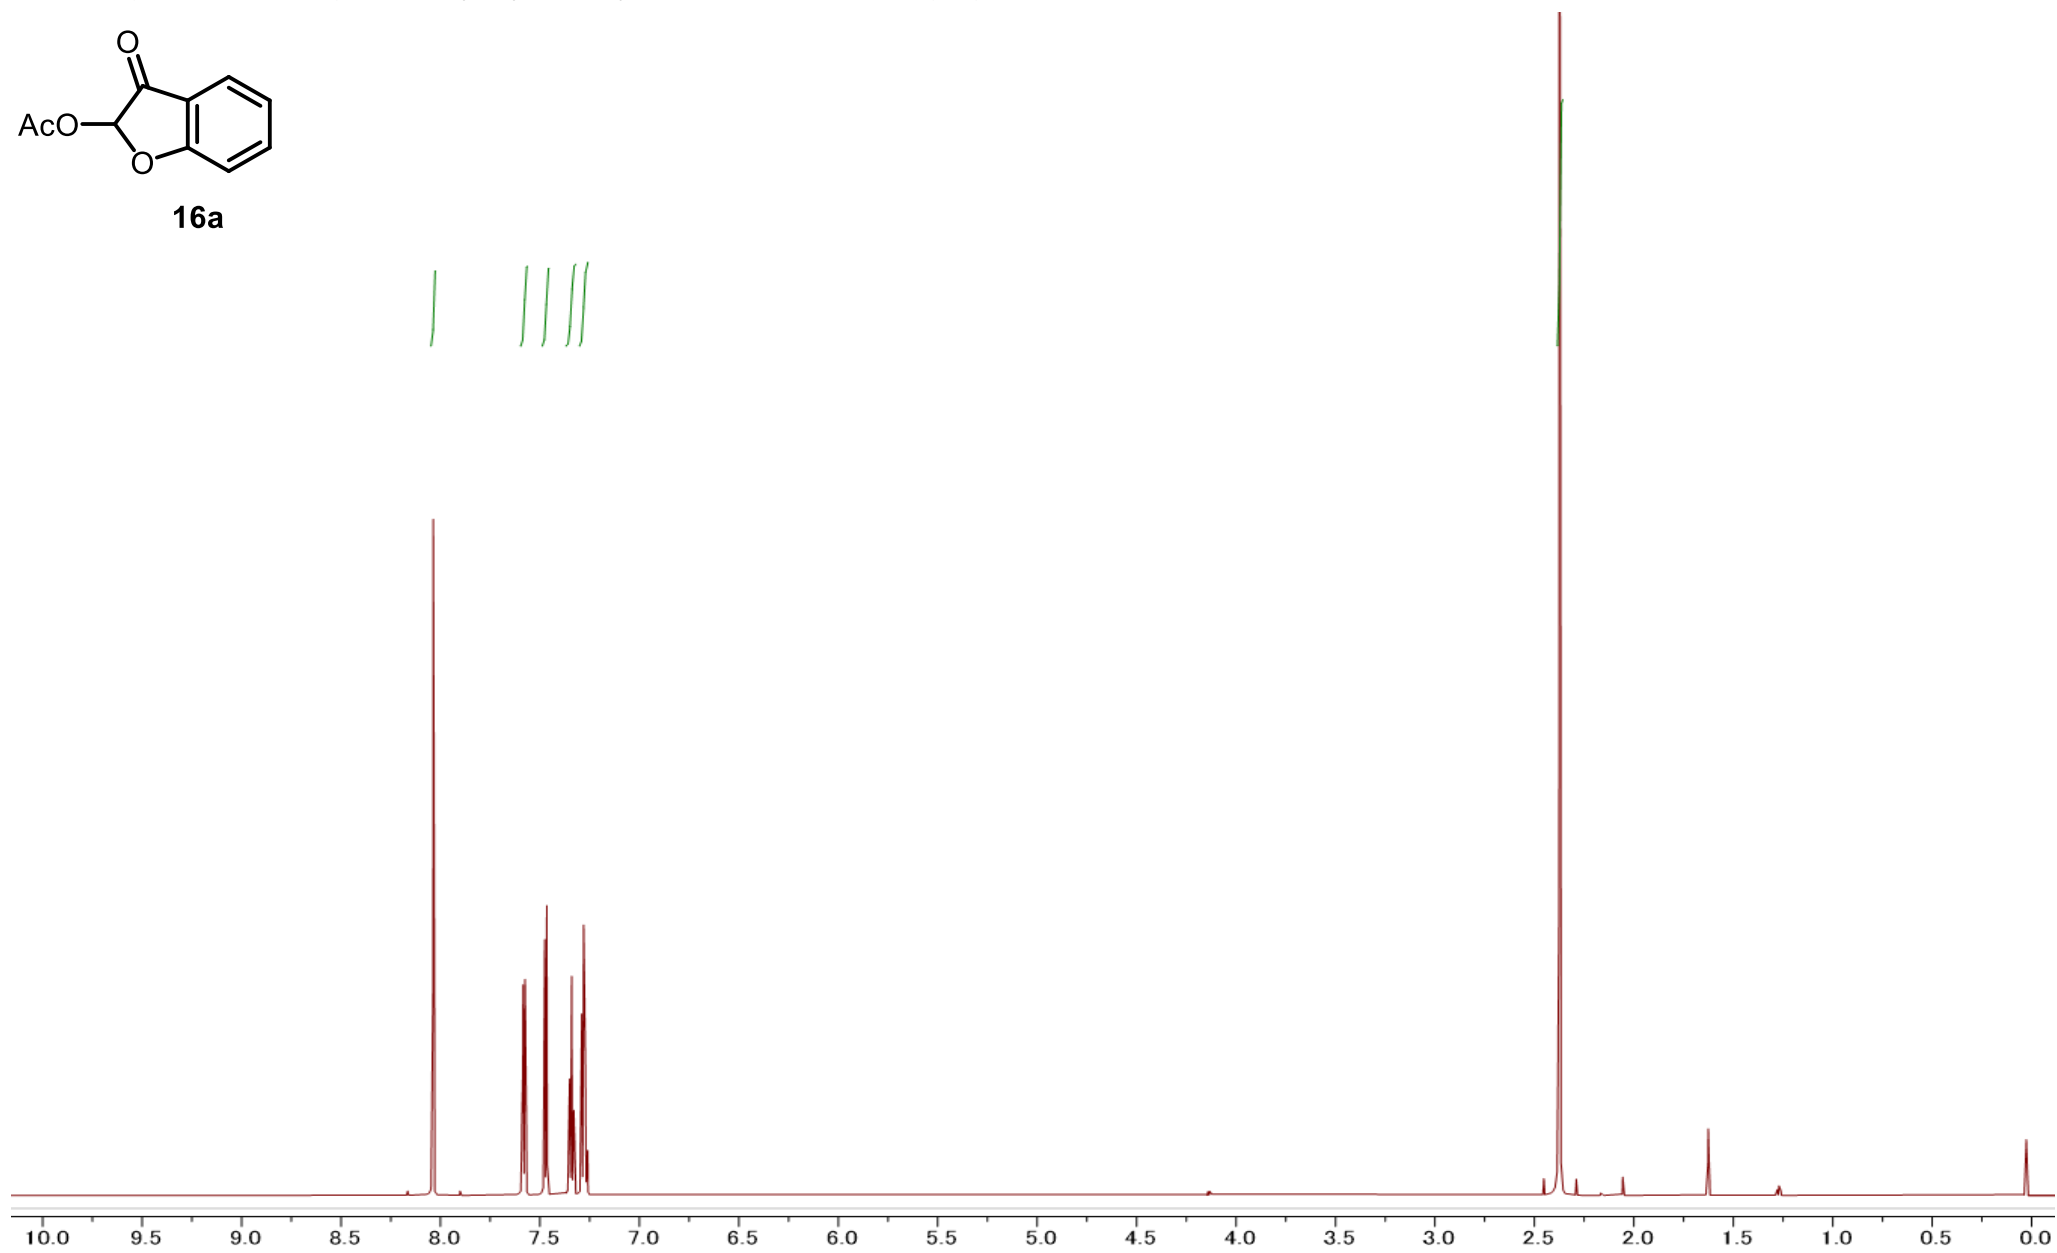

<sup>13</sup>C-NMR (200 MHz, CDCl<sub>3</sub>) of 2-Acetyloxy-2,3-dihydro-1-benzofuran-3-one (16a).

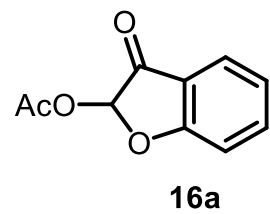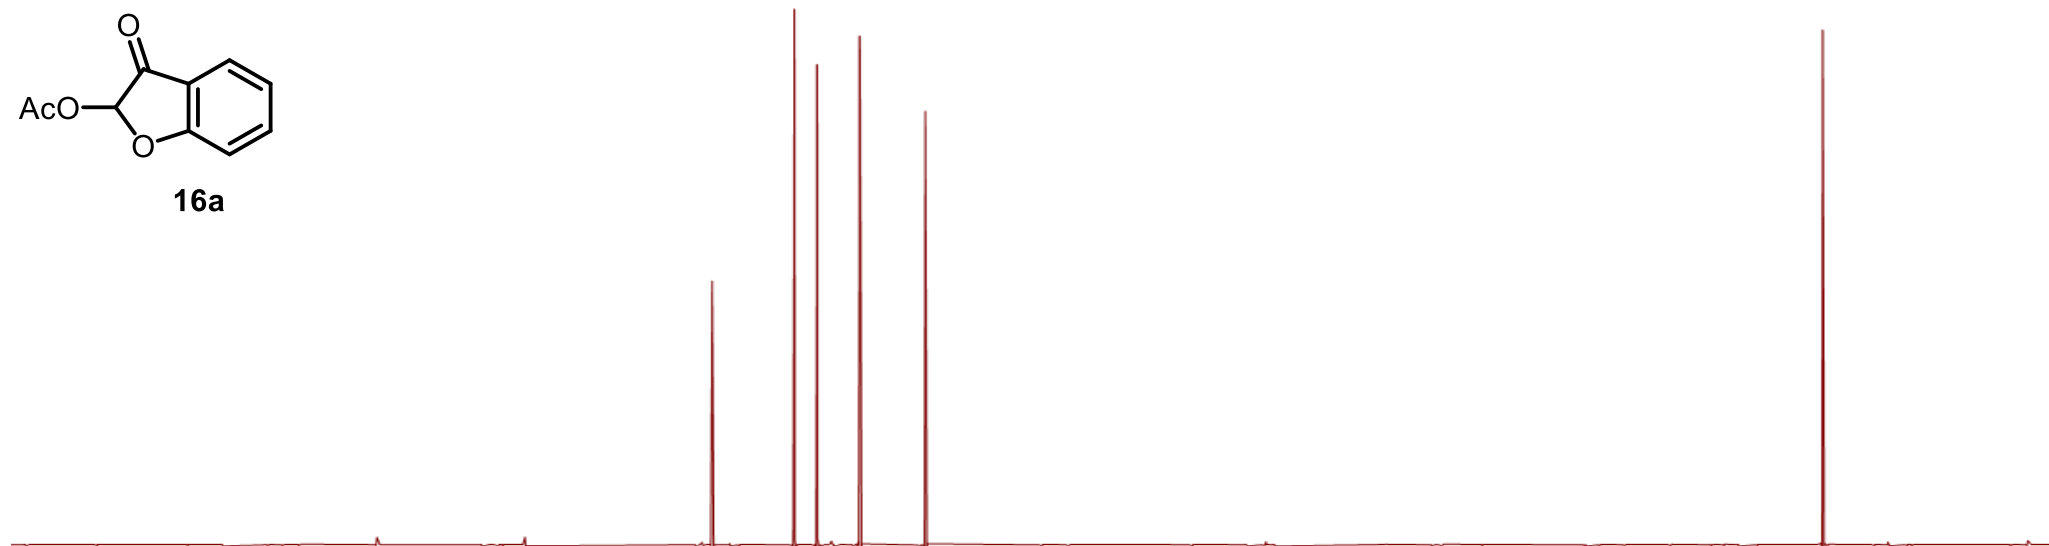

ide upper アセトキシ体.11.fid

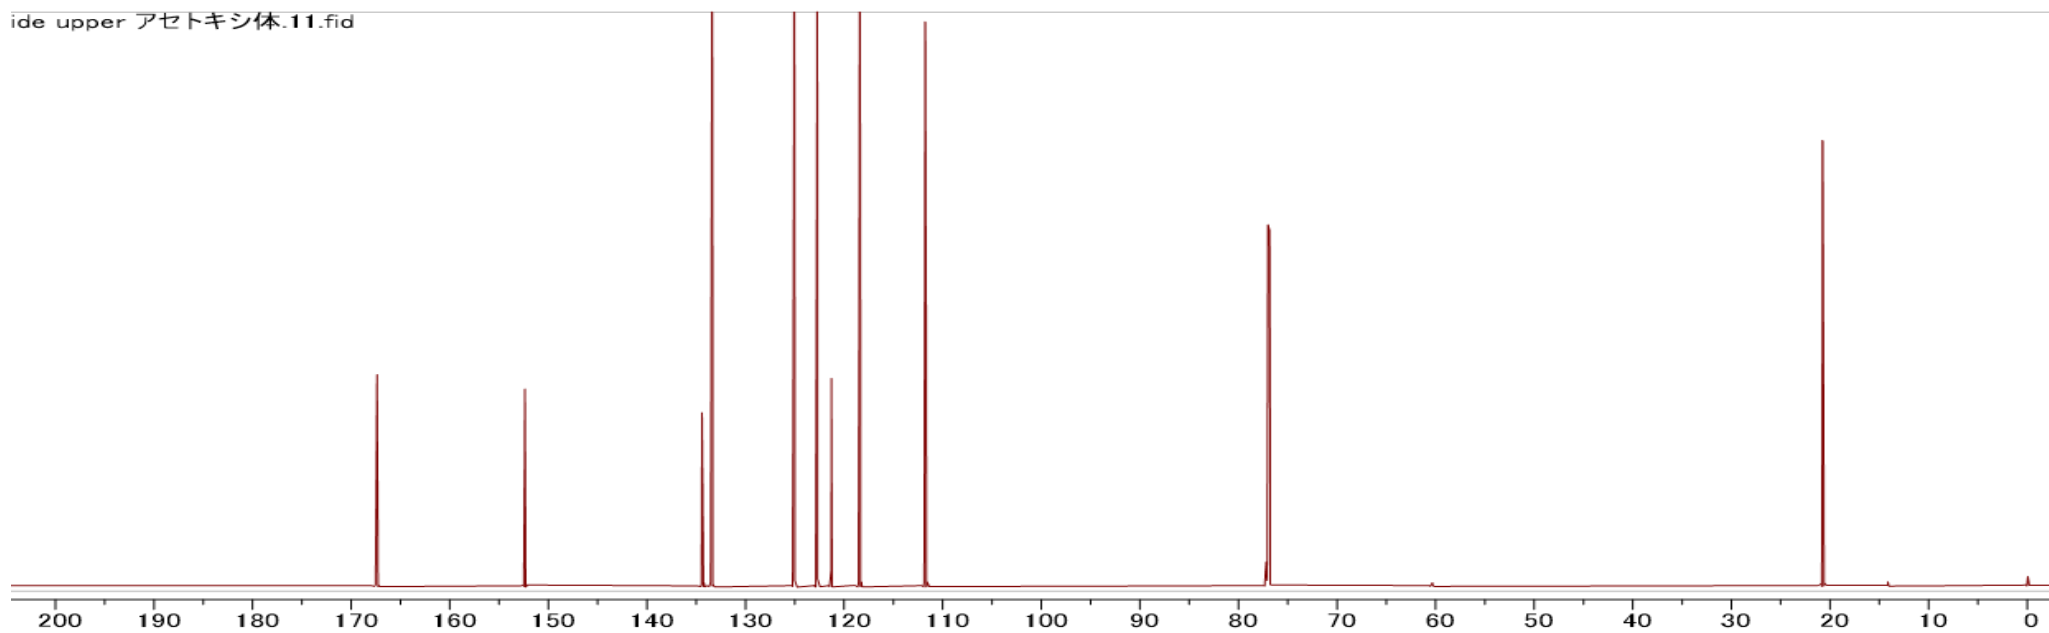

<sup>1</sup>H-NMR (800 MHz, CDCl<sub>3</sub>) of 2,3-Dihydro-1-benzofuran-3-one (18).

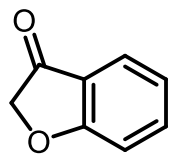

18

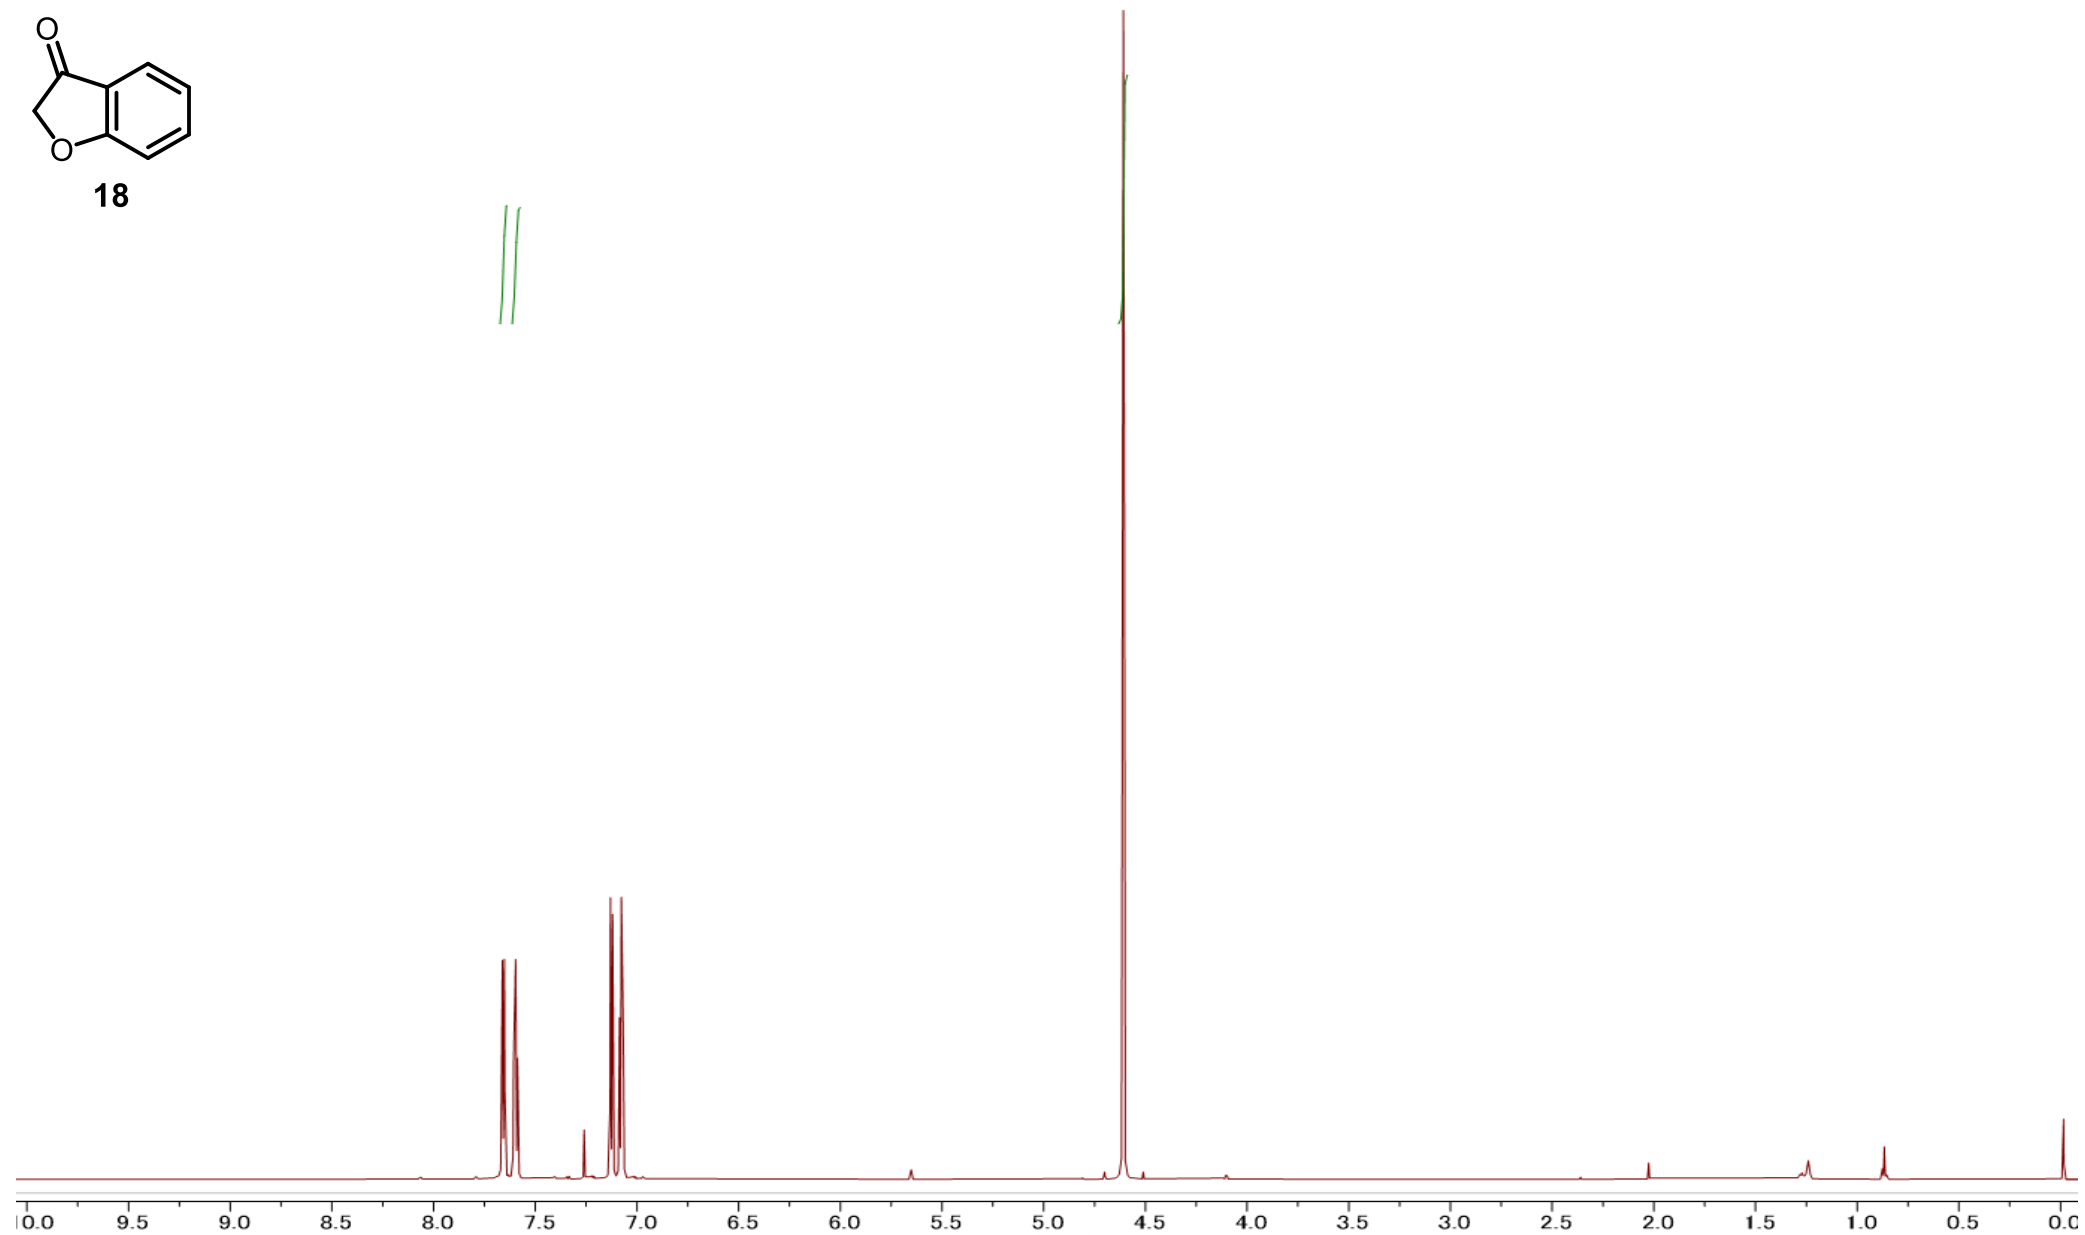

<sup>13</sup>C-NMR (200 MHz, CDCl<sub>3</sub>) of 2,3-Dihydro-1-benzofuran-3-one (18).

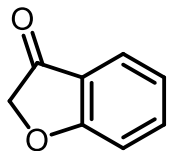

18

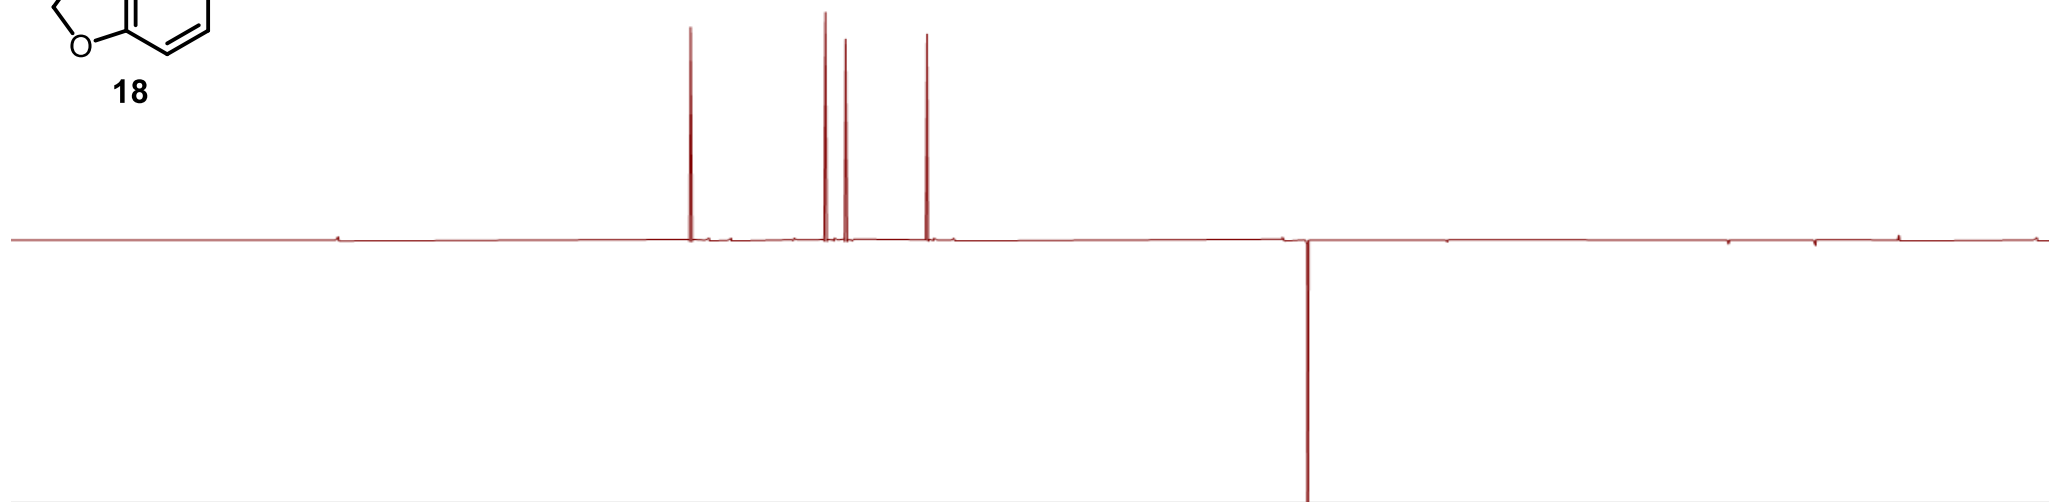

凡体.21.fid

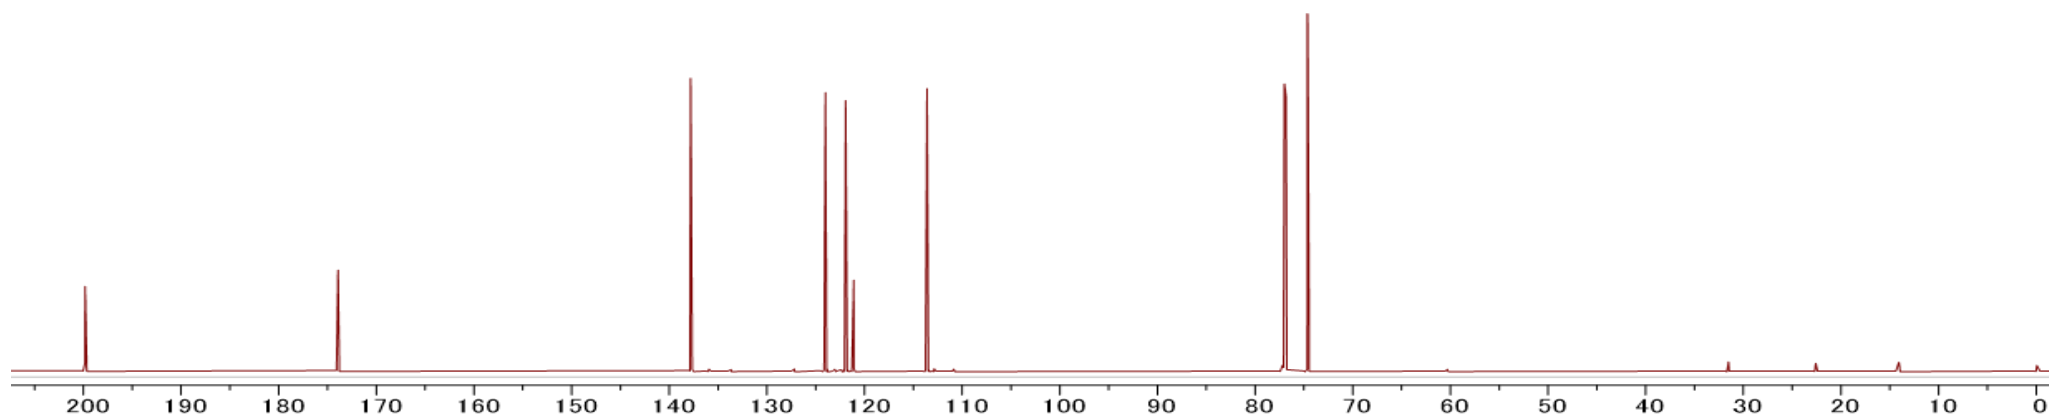

<sup>1</sup>H-NMR (800 MHz, CDCl<sub>3</sub>) of 2-Bromo-2,3-dihydro-1-benzofuran-3-one (16b).

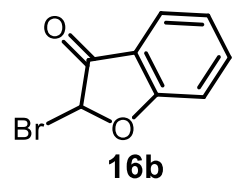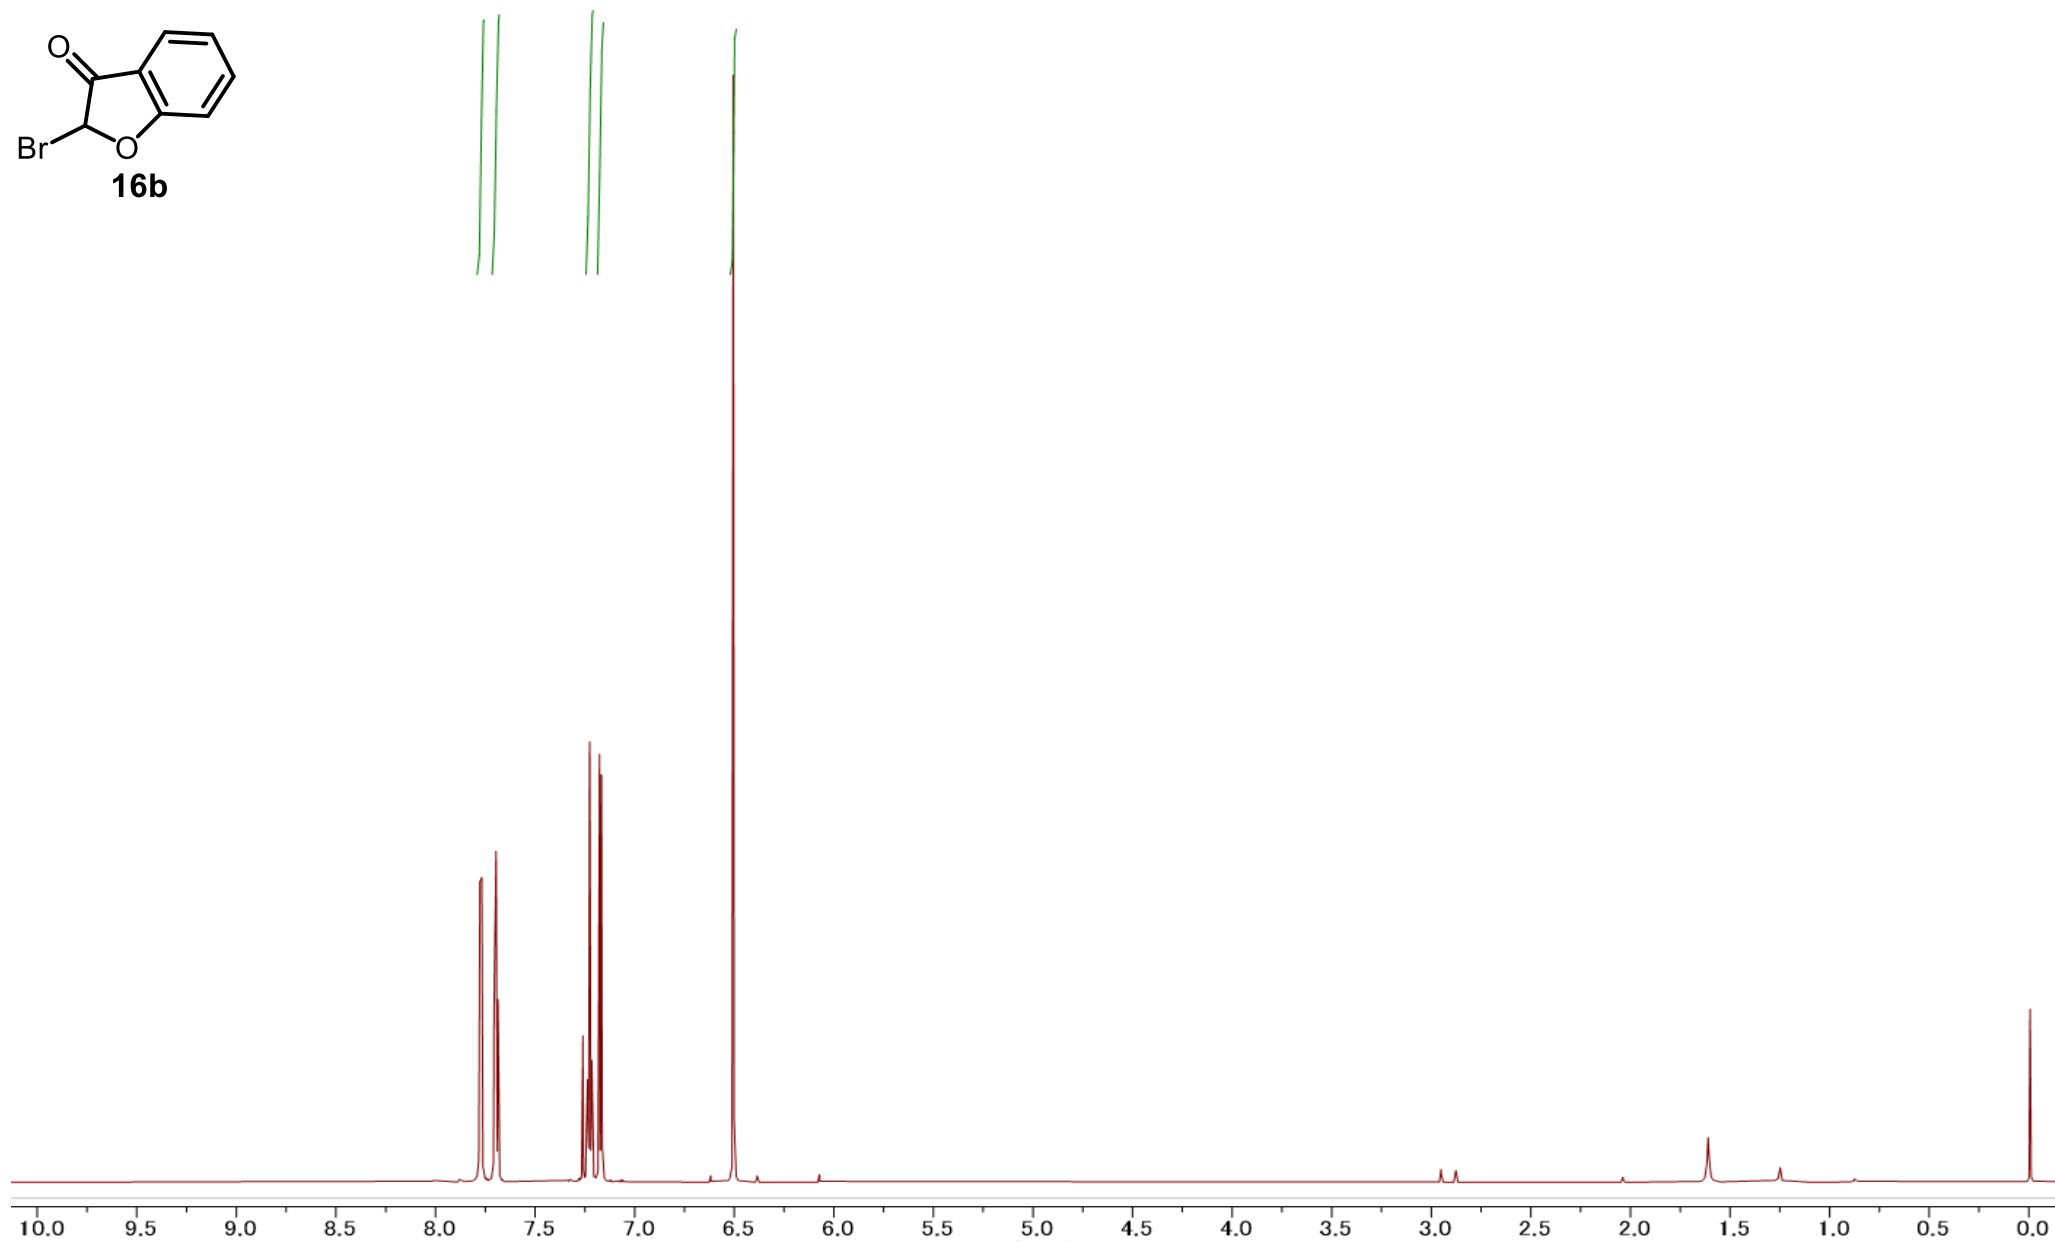

<sup>13</sup>C-NMR (200 MHz, CDCl<sub>3</sub>) of 2-Bromo-2,3-dihydro-1-benzofuran-3-one (16b).

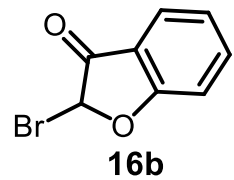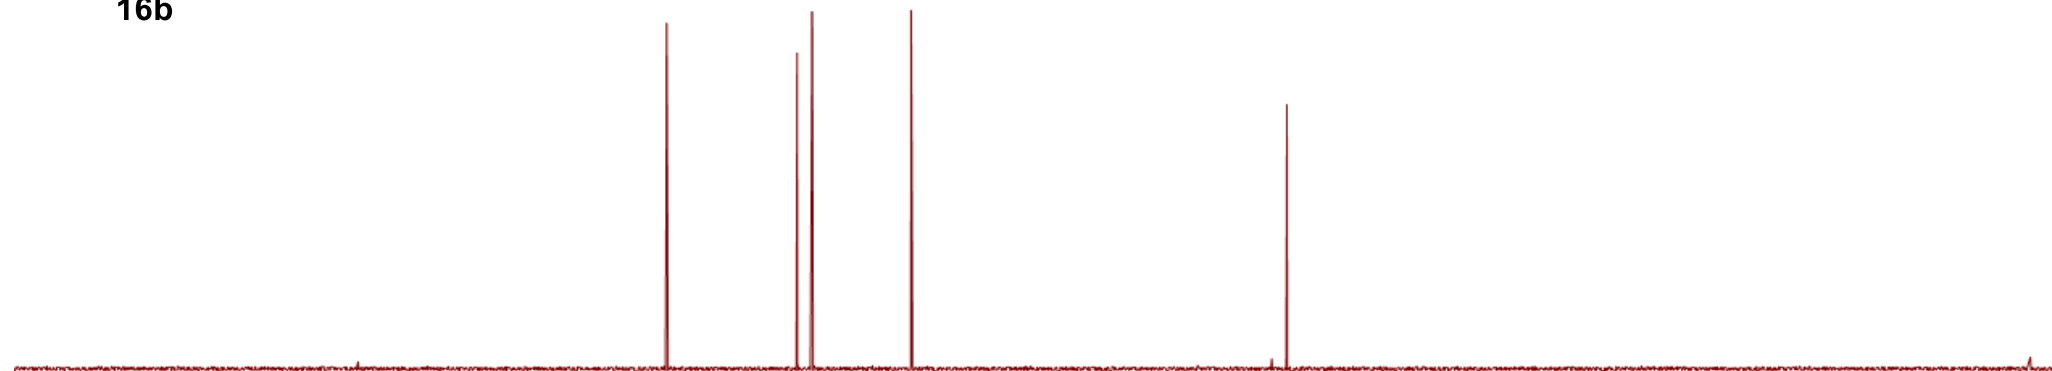

side Br体.41.fid

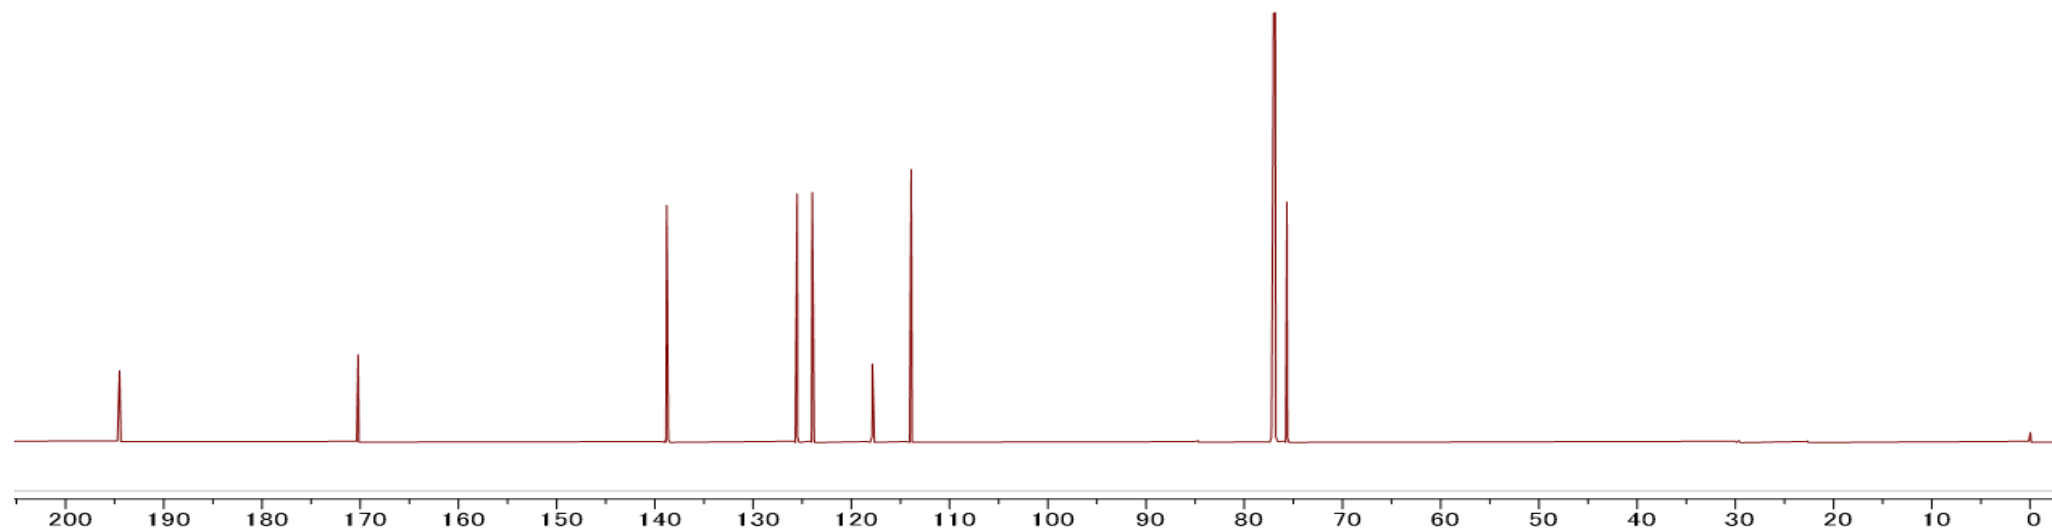

<sup>1</sup>H-NMR (800 MHz, CDCl<sub>3</sub>) of 3-(2,3,4,6-Tetra-*O*-propionyl-β-D-glucopyranosyloxy)-benzofura-2-yl 2,3,4,6-tetra-*O*-acetyl-1-thio-β-D-glucopyranoside (**20**).

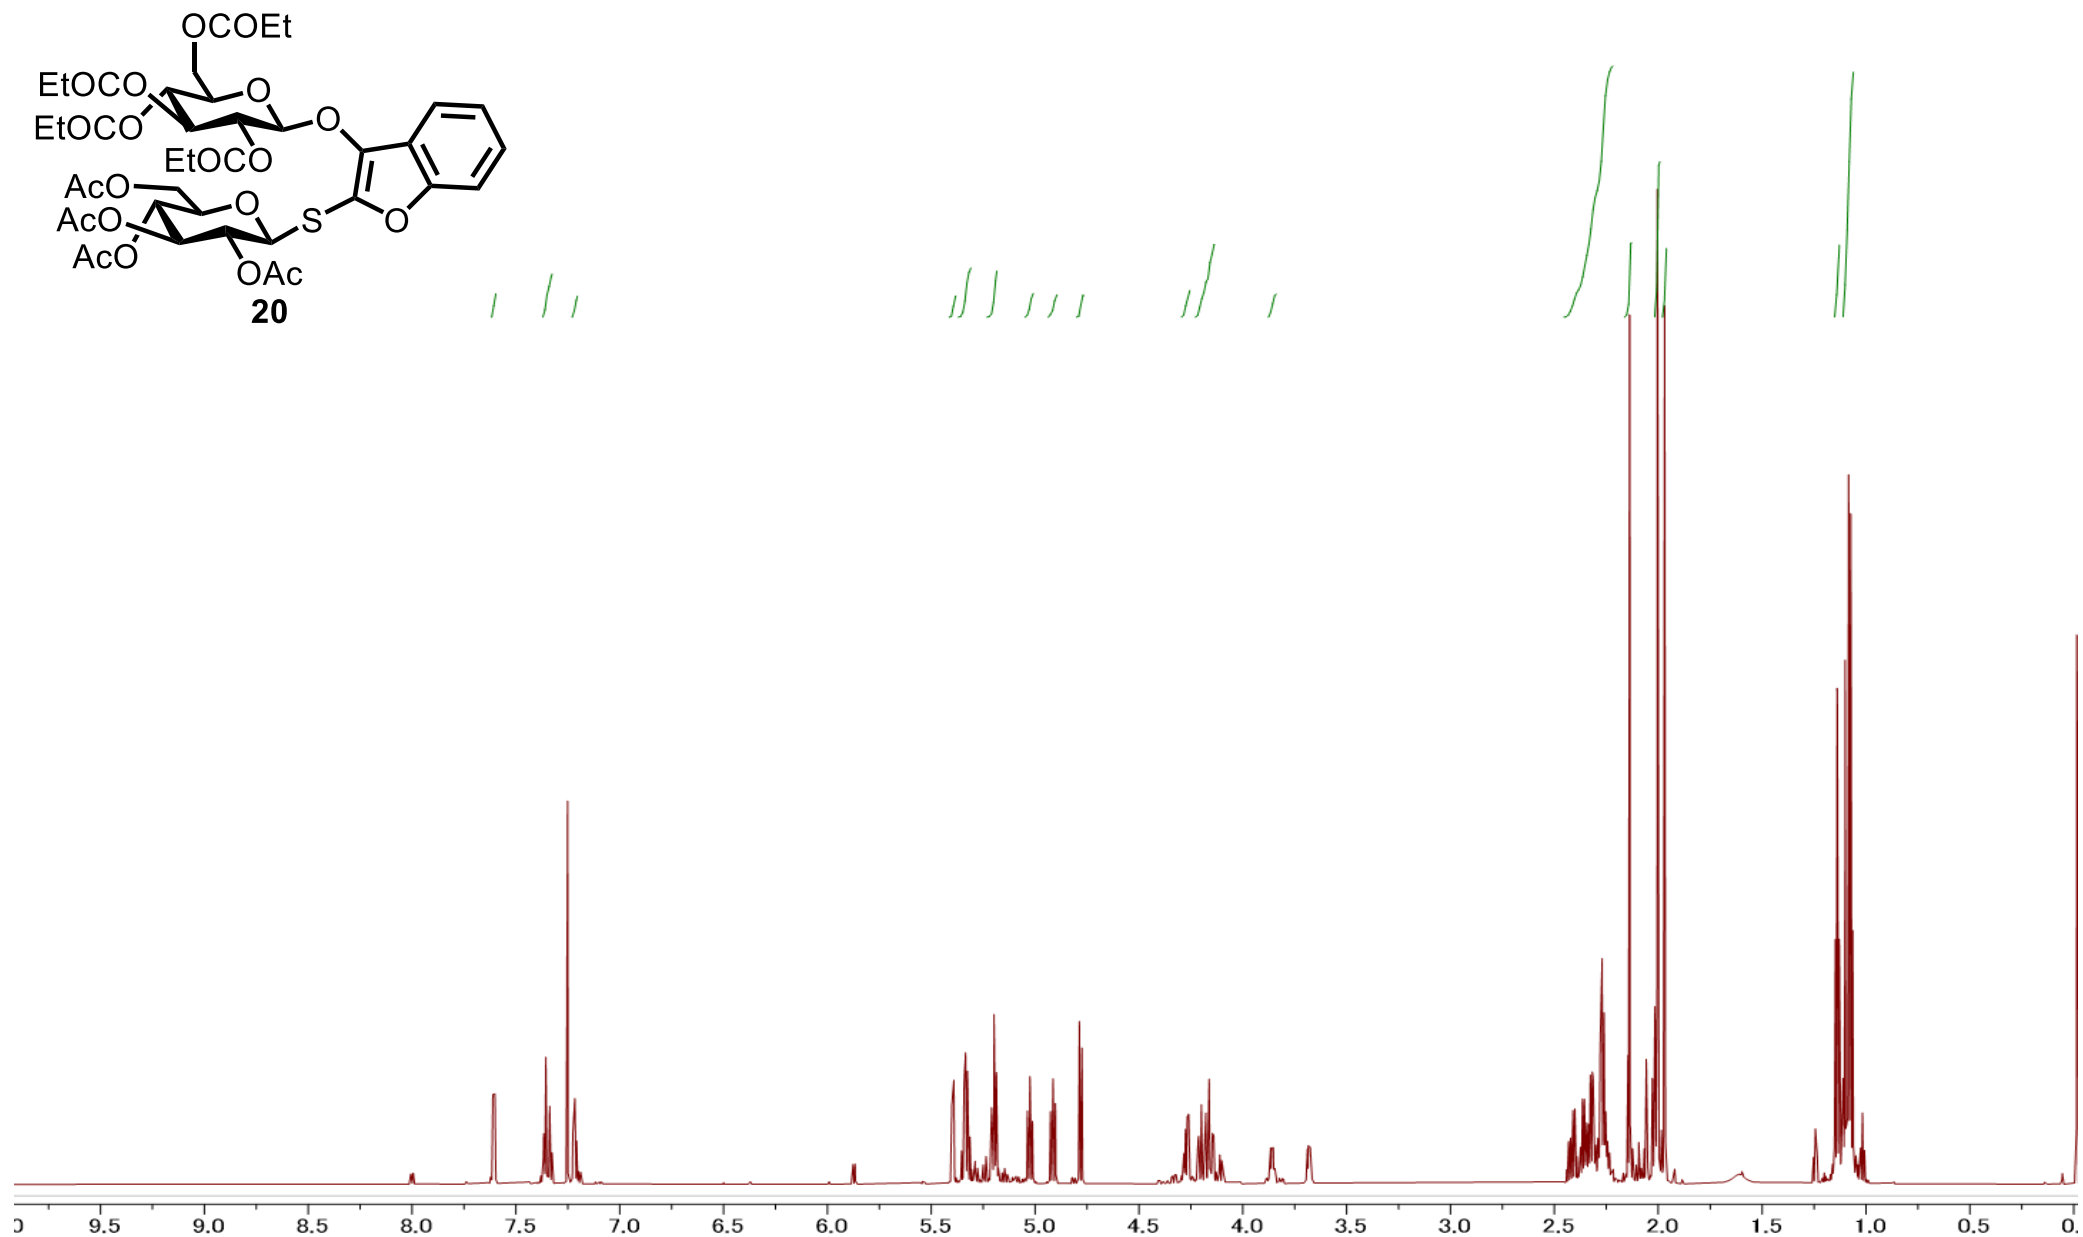

$^{13}\text{C}$ -NMR (200 MHz,  $\text{CDCl}_3$ ) of 3-(2,3,4,6-Tetra-*O*-propionyl- $\beta$ -D-glucopyranosyloxy)-benzofura-2-yl 2,3,4,6-tetra-*O*-acetyl-1-thio- $\beta$ -D-glucopyranoside (20).

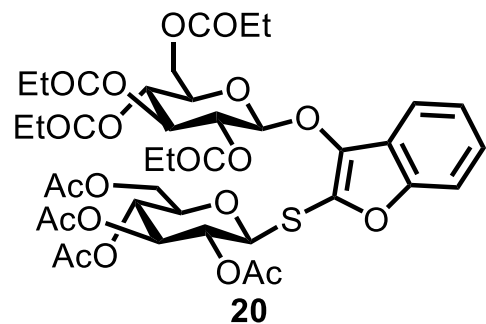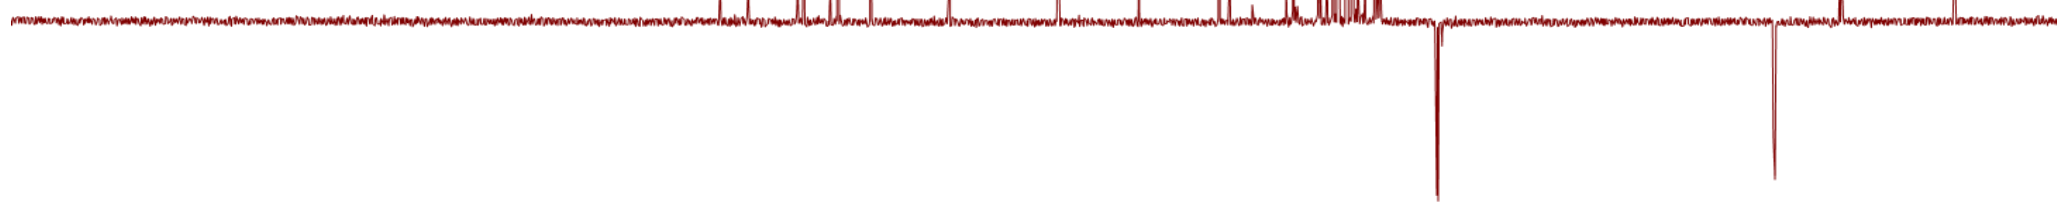

-OProGluSAcGlu  
ngle pulse decoupled gated NOE

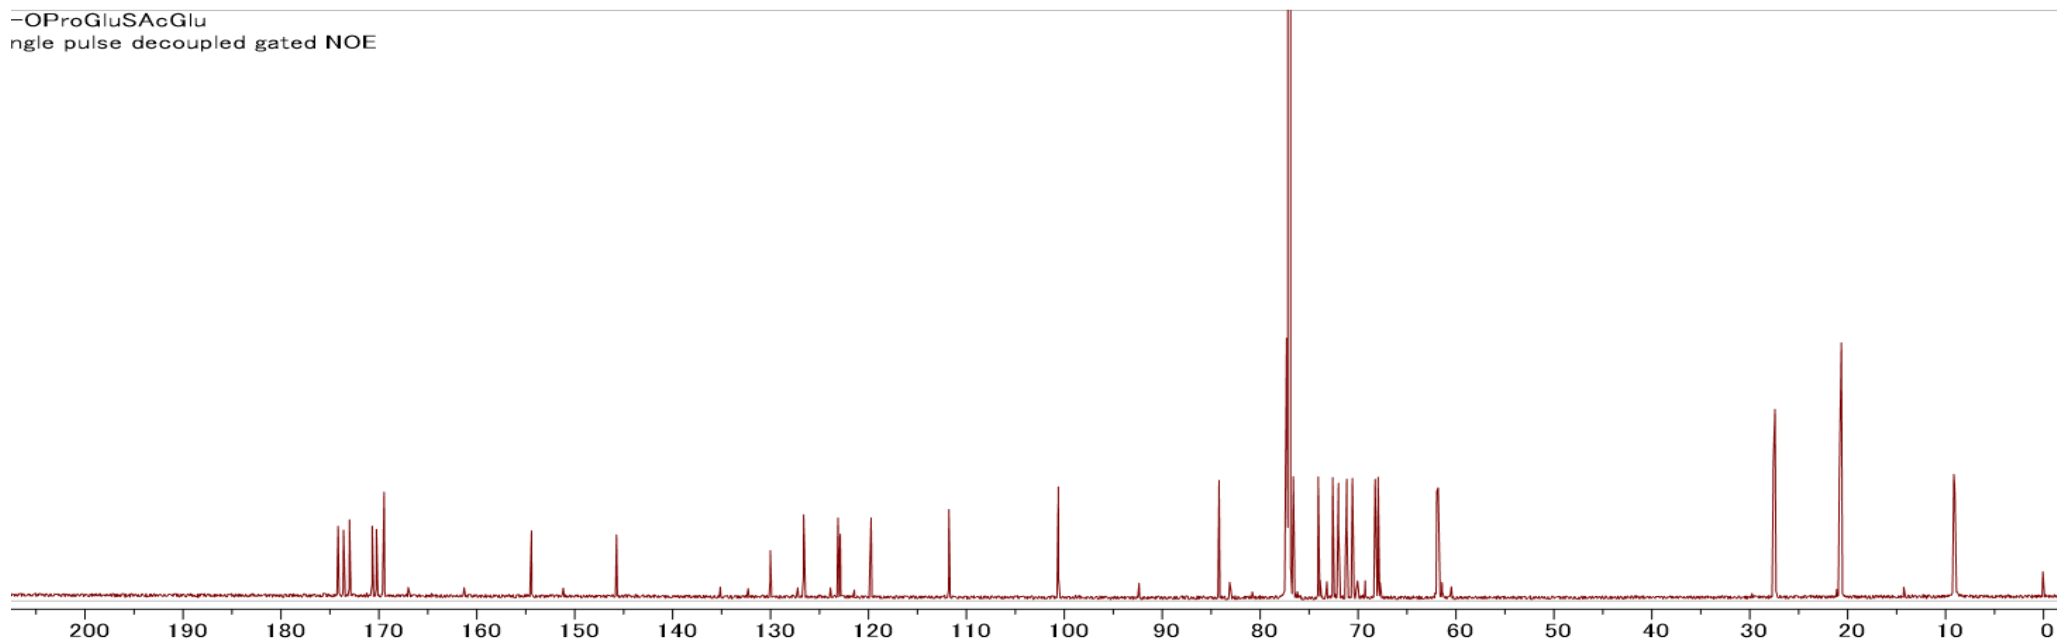

<sup>1</sup>H-NMR (800 MHz, DMSO-*d*<sub>6</sub>) of 3-(β-D-Glucopyranosyloxy)benzofuran-2-yl 1-thio-β-D-glucopyranoside (11).

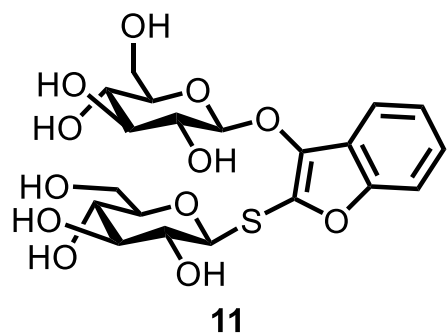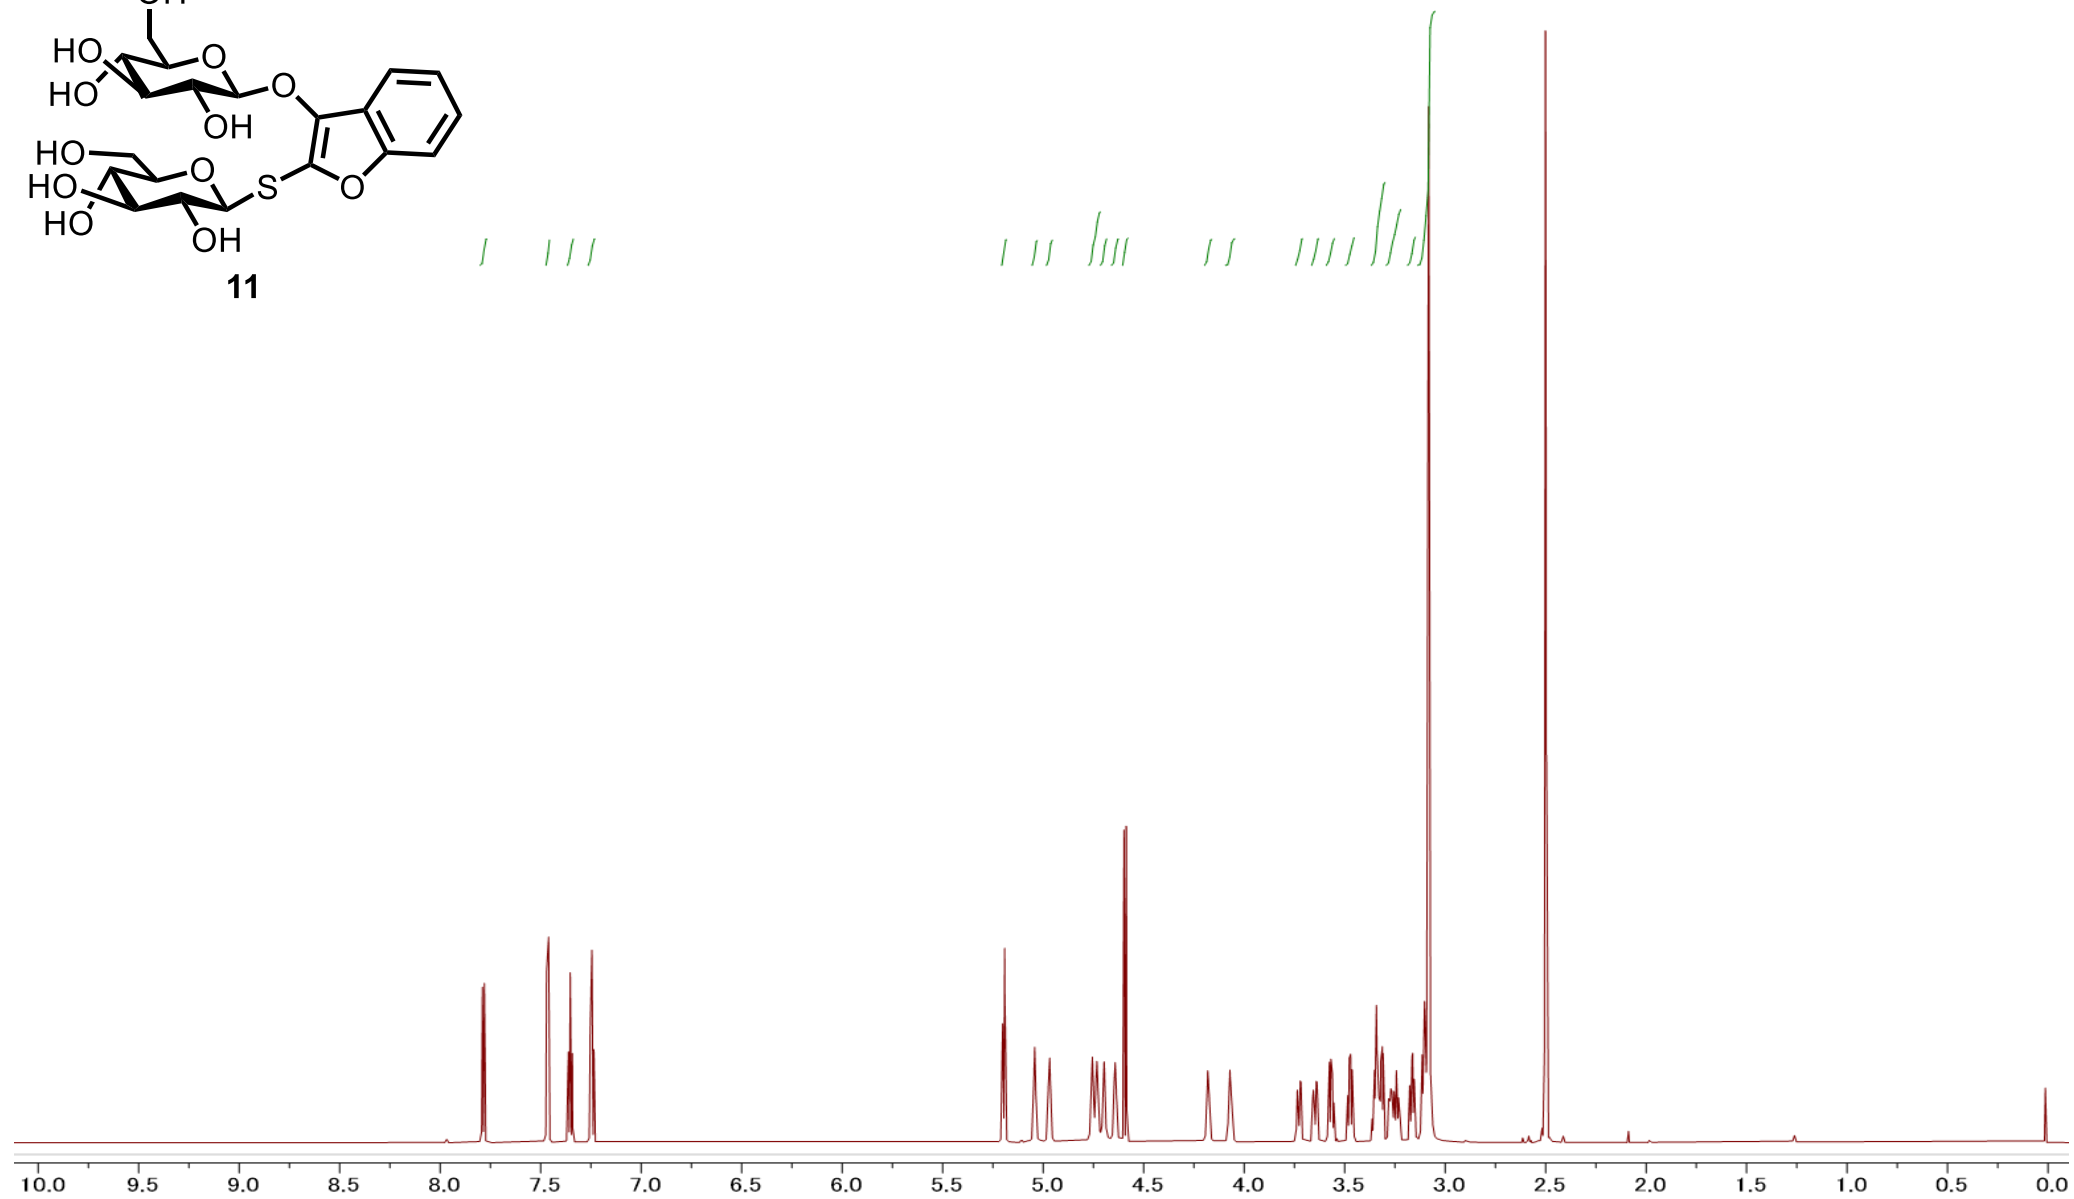

<sup>13</sup>C-NMR (200 MHz, DMSO-*d*<sub>6</sub>) of 3-(β-D-Glucopyranosyloxy)benzofuran-2-yl 1-thio-β-D-glucopyranoside (11).

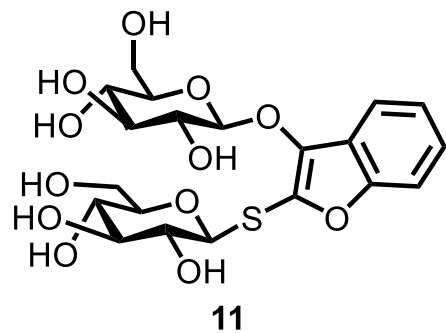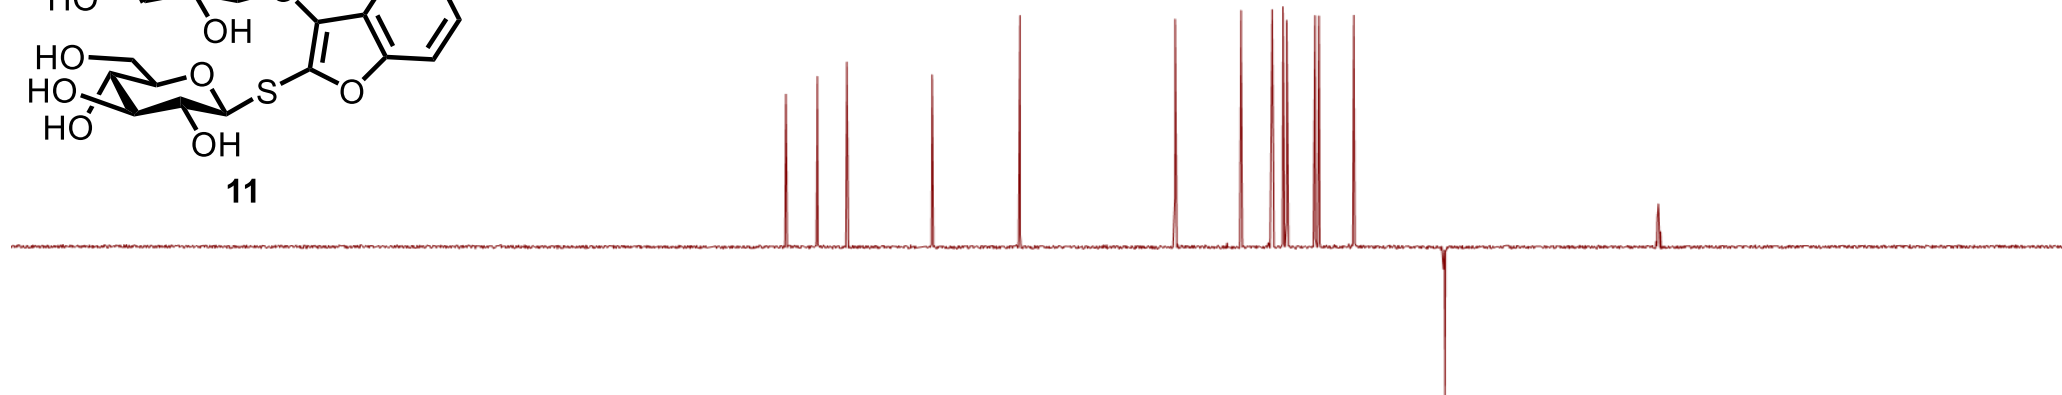

-GluSGlu  
ngle pulse decoupled gated NOE

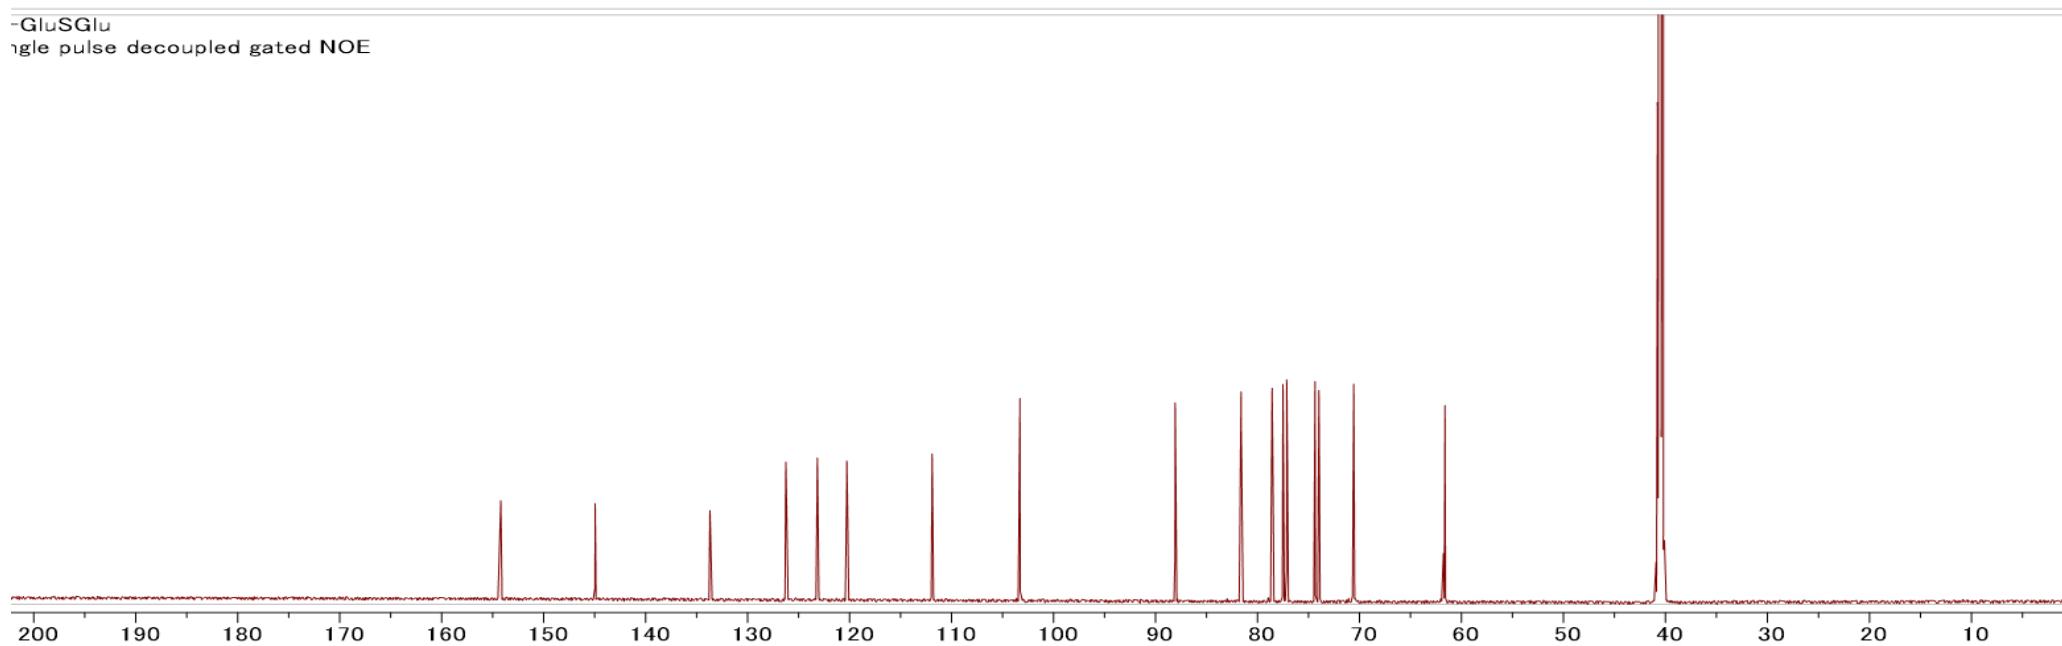

Supplement: d6md00273k1.pdf [file d6md00273k1.pdf]
